# Supplementary material for: Charcoal morphologies and morphometrics of a Eurasian grass-dominated system for robust interpretation of past fuel and fire type
Source: Copernicus journal article supplement (doi:10.5194/egusphere-2023-1266), 2023-06-14
Supplement: Supplementary file 3 [file File_S1_20230613.xlsx]

## Sheet: 250 degrees C
Graminoids	Area	Perimetre	Lenght	Width	A/P	L/W	W/L		Area	Perimetre	Lenght	Width	A/P	L/W	W/L	Area	Perimetre	Lenght	Width	A/P	L/W	W/L	Area	Perimetre	Lenght	Width	A/P	L/W	W/L		Area	Perimetre	Lenght	Width	A/P	L/W	W/L	Area	Perimetre	Lenght	Width	A/P	L/W	W/L	Area	Perimetre	Lenght	Width	A/P
	Agropyron repens -S &L	Agropyron repens -S &L	Agropyron repens -S &L	Agropyron repens -S &L	Agropyron repens -S &L	Agropyron repens -S &L	Agropyron repens -S &L		Agropyron cristatum	Agropyron cristatum	Agropyron cristatum	Graminee 7 steam	Agropyron cristatum	Agropyron cristatum	Agropyron cristatum	Agropyron sp.	Agropyron sp.	Agropyron sp.	Agropyron sp.	Agropyron sp.	Agropyron sp.	Agropyron sp.	Agropyron cristatum -I	Agropyron cristatum -I	Agropyron cristatum -I	Agropyron cristatum -I	Agropyron cristatum -I	Agropyron cristatum -I	Agropyron cristatum -I		Bromus sterilis	Bromus sterilis	Bromus sterilis	Bromus sterilis	Bromus sterilis	Bromus sterilis	Bromus sterilis	Festuca sp.	Festuca sp.	Festuca sp.	Festuca sp.	Festuca sp.	Festuca sp.	Festuca sp.	Agropyron repens-I	Agropyron repens-I	Agropyron repens-I	Agropyron repens-I	Agropyron repens-I
	414914	3590	1364.2	412.2	115.575	3.30956	0.302155		191154	2405.4	793.8	326.7	79.4685	2.42975	0.411565	1.04903e+06	8543.8	2775.7	629.3	122.783	4.41077	0.226718	518366	7576.7	2603.5	506.9	68.4158	5.13612	0.194699		336540	4553.7	1226.2	483.2	73.9047	2.53767	0.394063	197546	4050.6	1233.6	292.5	48.7696	4.21744	0.237111	382018	4576.5	1329.4	391.5	83.4738
	221028	3122.3	1106.4	277.6	70.79	3.98559	0.250904		686043	7710.3	3308.5	285.7	88.9774	11.5803	0.0863533	11543.1	576.5	233.3	66.4	20.0227	3.51355	0.284612	301201	4499.1	1611.6	288.9	66.9469	5.5784	0.179263		219030	3251.4	928	454.4	67.3649	2.04225	0.489655	26351	931.1	380.3	93.8	28.3009	4.05437	0.246647	102996	2727.2	1156.7	137.8	37.7662
	682413	5908.1	1566.3	716.9	115.505	2.18482	0.457703		94443.7	1815.9	772	164.3	52.0093	4.69872	0.212824	39313.5	1016.8	335.9	173	38.6639	1.94162	0.515034	192162	3476.7	1053.6	298.9	55.2715	3.52492	0.283694		175423	1968.1	703.4	335.7	89.1332	2.09532	0.477253	282383	5535.1	1992.4	264.7	51.0168	7.52701	0.132855	24485.4	788.3	257.2	131	31.061
	92568	1437	520.7	237	64.4175	2.19705	0.455157		66749.4	1523	660.4	138.6	43.8276	4.76479	0.209873	17778.5	1102.6	479.6	66.9	16.1242	7.16891	0.139491	170840	4211.1	1671.9	233.9	40.569	7.14793	0.139901		21301.8	1087.6	476.5	63.5	19.5861	7.50394	0.133263	532925	5608.4	2284.2	371.8	95.0227	6.14363	0.16277	556437	7524.6	3033.6	291.6	73.9491
	117479	2486.1	917.5	182.5	47.2545	5.0274	0.19891		355419	2920.5	1196.5	390.2	121.698	3.06638	0.326118	8724.5	552.7	246.5	49.8	15.7852	4.9498	0.202028	61745.8	1549.8	678.8	126.5	39.8411	5.36601	0.186358		679518	5426.7	2116.4	472	125.218	4.4839	0.22302	12820.6	723.5	299.5	65.7	17.7202	4.5586	0.219366	139775	2345.7	778.8	245.1	59.5876
	18113.1	777.2	274.6	93.4	23.3056	2.94004	0.340131		81166.8	2765.4	1187.6	169.8	29.3508	6.99411	0.142977	741244	8640.2	2068.7	654.9	85.7901	3.1588	0.316576	159546	2032.2	733.8	282.6	78.5088	2.5966	0.385119		1.31752e+06	11628.7	4370.1	561.6	113.299	7.78152	0.12851	368082	3845.8	1723.4	287.8	95.7102	5.98819	0.166995	232444	4198.3	1144.7	287.1	55.3662
	66744.3	1575.2	554.7	197.6	42.372	2.80719	0.356229		292852	4272	1819.7	216.7	68.5514	8.39732	0.119086	705058	5308.4	1752.1	572.2	132.819	3.06204	0.32658	49006.3	1048	365.9	184.7	46.7617	1.98105	0.504783		15360.4	618.6	216	97.9	24.8309	2.20633	0.453241	85029.8	1411.5	473.8	243.4	60.2407	1.94659	0.513719	85090.6	2620.2	1105.5	116.7	32.4748
	44215.7	1148.7	341.1	189.3	38.4919	1.8019	0.554969		69121.9	1423.8	641	141.8	48.5475	4.52045	0.221217	59094.5	1456.1	572.2	150	40.5841	3.81467	0.262146	13636.8	819.1	356.1	52.9	16.6485	6.73157	0.148554		24845.3	965.1	387.4	86.7	25.7438	4.46828	0.2238	214757	3004.2	1043.9	284.9	71.4855	3.66409	0.272919	96096.4	1851	618.1	219.6	51.9159
	278561	3147.9	1017.7	363.9	88.491	2.79665	0.357571		120181	1889.7	702.7	238.5	63.5981	2.94633	0.339405	147881	2715.1	973.4	250.4	54.466	3.88738	0.257243	17803.9	764	306.4	78.5	23.3035	3.90318	0.256201		47064.7	1107.9	386.4	167.9	42.481	2.30137	0.434524	221575	3822.7	1334.1	338.7	57.963	3.93888	0.253879	310529	10023.9	2446.7	270.2	30.9788
	108456	2939.3	860.8	179.5	36.8985	4.79554	0.208527		943510	6185.2	1711.9	745.3	152.543	2.29693	0.435364	29960.4	911.9	376.2	103.3	32.8549	3.64182	0.274588	306093	3318.8	955.9	429.5	92.23	2.22561	0.449315		10458.3	532.7	216.9	63.4	19.6326	3.42114	0.292301	14290.8	925.3	294.8	83.2	15.4445	3.54327	0.282225	135820	1878.3	533.2	363.7	72.3103
	58298.6	1403.3	383.7	219	41.5439	1.75205	0.570758		111213	2425.6	1144.2	131.9	45.8499	8.67475	0.115277	13064	822.4	329.5	74.9	15.8852	4.3992	0.227314	115685	2854.1	802.3	338	40.5328	2.37367	0.421289		413727	4946.6	1730.6	418	83.6387	4.14019	0.241535	143288	2630.6	1214.7	161.9	54.4696	7.50278	0.133284	45655.4	1894.4	563.4	129.7	24.1002
	131430	3225.6	1112.1	207.3	40.746	5.36469	0.186404		165877	4556.2	1390.8	312.6	36.4069	4.44914	0.224763	49254.7	1038.5	395.3	162	47.4287	2.44012	0.409815	48504.4	1502	556.3	151	32.2932	3.68411	0.271436		121469	2286.6	945.1	174.1	53.1221	5.42849	0.184213	92410.9	1731.2	528	235.2	53.3797	2.2449	0.445455	67844.4	1766.2	652.5	143.1	38.4126
	400268	5926.8	1893.5	442.5	67.5353	4.2791	0.233694		203878	2459.3	991.9	272.8	82.9007	3.636	0.275028	14103.2	642.5	261.9	83.8	21.9505	3.1253	0.319969	1440249	16837.4	3308.1	1240.7	85.5387	2.66632	0.375049		62987.8	1610.7	699.3	121.5	39.1059	5.75556	0.173745	167616	1871.4	575.7	385	89.5672	1.49532	0.668751	107599	4560.3	1104.4	235.8	23.5947
	42522.5	1147.9	401.6	144.3	37.0437	2.78309	0.359313		580015	7528.9	2982.7	340.7	77.0385	8.75462	0.114225	133489	2630.3	896.8	247	50.7503	3.63077	0.275424	8572.4	546.9	213.8	56.6	15.6745	3.77739	0.264733		182013	3494.6	1650.7	158	52.0842	10.4475	0.095717	19963.5	959	375.7	77.4	20.817	4.85401	0.206015	108339	1866.8	477.8	307.9	58.0347
	15086.7	840.9	353.6	63.3	17.9411	5.5861	0.179016		599624	7095.2	1896	524.5	84.5112	3.61487	0.276635	352848	3757.7	1425.3	333.9	93.9001	4.26864	0.234266	328535	3433.2	898.2	513.8	95.6936	1.74815	0.572033		24323.2	1144.2	529.5	63.7	21.2578	8.3124	0.120302	343556	3319.9	1224.5	372.8	103.484	3.2846	0.304451	63951	3017.4	904.2	169.9	21.1941
	218868	6500.4	1800.6	310.7	33.6699	5.7953	0.172554		341320	4409.8	1785.9	272.6	77.4004	6.55136	0.15264	9870.2	801	234.8	95	12.3223	2.47158	0.4046	89470.6	2160.1	762.2	187.2	41.4197	4.07158	0.245605		28748.8	787.4	273.4	136.6	36.511	2.00146	0.499634	391219	5953.9	2066.9	574.1	65.708	3.60024	0.277759	12430.3	974.6	308.1	75.5	12.7543
	27719.7	1020.5	452.7	87.4	27.1629	5.17963	0.193064		222964	2269.4	767.6	384.1	98.2481	1.99844	0.500391	33813.2	1152.6	472.6	96.8	29.3365	4.88223	0.204824	574733	6255.2	1715.4	477.9	91.8808	3.58945	0.278594		157558	1921.6	723.5	283.4	81.9933	2.55293	0.391707	168148	4179.2	1278.7	446.7	40.2346	2.86255	0.349339	24708.5	882.3	379.5	86.1	28.0046
	65771	2306.6	912.9	102.1	28.5143	8.94123	0.111841		569354	7213.1	2951.4	338.2	78.9334	8.72679	0.11459	65208.2	1531.5	557.7	164.7	42.578	3.38616	0.29532	10524.2	693.8	262.8	64.6	15.1689	4.06811	0.245814		15836.9	613.9	233.3	89.1	25.7972	2.61841	0.381912	421844	7737.4	2669.1	598.8	54.5201	4.45741	0.224345	48190.1	2061.9	429	211	23.3717
	46106.6	1404.1	567.5	121.9	32.8371	4.65546	0.214802		602934	7774.4	1830.2	590.4	77.5538	3.09993	0.322588	27197.6	1285.7	472.4	87.7	21.1539	5.38655	0.185648	9094.6	782.6	208.2	98.8	11.621	2.10729	0.474544		709671	7722.8	2665.8	1064.5	91.893	2.50427	0.399317	204126	3700.6	1458.9	235.4	55.1603	6.19754	0.161354	51799.6	2112.4	485.9	214.6	24.5217
	251226	3521.9	1538.3	219.9	71.3326	6.99545	0.14295		338852	4375.1	1778.6	271.3	77.45	6.55584	0.152536	155738	3839.8	1268.1	239.1	40.559	5.30364	0.18855	14311	918.5	360	70.3	15.5808	5.12091	0.195278		26944.1	1174.5	454.2	85	22.9409	5.34353	0.187142	146370	1681.6	576.7	325.8	87.0421	1.7701	0.564938	139764	2226.2	565.7	334.1	62.7816
	27527.1	915.8	398.4	91.4	30.058	4.35886	0.229418		39364.2	1768.3	890.6	61	22.261	14.6	0.0684932	22756.7	788.7	254.3	124	28.8534	2.05081	0.487613	351424	4945.6	1647.5	316.7	71.0579	5.20208	0.192231		172645	4104.8	978.7	305.3	42.0593	3.2057	0.311944	95254.8	1466	535.3	235.9	64.976	2.26918	0.440687	13910.6	600.1	229.3	79.9	23.1805
	232175	4233.4	1047.8	568.7	54.8437	1.84245	0.542756		377876	3188.1	932.3	587.6	118.527	1.58662	0.630269	68092.8	2102.6	724	134.5	32.385	5.3829	0.185773	14660.8	645.5	187	113.7	22.7123	1.64468	0.608021		13946	841.7	239.7	119.3	16.5688	2.00922	0.497705	69319.6	1553.3	437.6	234.1	44.6273	1.86929	0.534963	437711	13453.2	2000.1	391.5	32.5358
	112014	2779.2	1241.5	123.2	40.3045	10.0771	0.0992348		48235.7	1664.9	781.9	112.3	28.9721	6.9626	0.143625	187138	3615.2	1080.8	275.2	51.7644	3.92733	0.254626	223101	4794.2	859	526.4	46.5356	1.63184	0.612806		84122.3	1572.8	651.1	173.2	53.4857	3.75924	0.266011	277461	2743	902.2	408.7	101.152	2.20749	0.453004	43779.7	1585.1	724.6	79.3	27.6195
	85237.6	2459.2	984.5	150.9	34.6607	6.52419	0.153276		931758	6974.8	3039.1	413.9	133.589	7.34259	0.136192	19750.5	881.4	308.5	93.5	22.4081	3.29947	0.303079	19664.4	709	240.6	115.9	27.7354	2.07593	0.481712		25550	765.8	304.1	111.3	33.3638	2.73226	0.365998	65897.7	2062.9	893	116.6	31.9442	7.65866	0.130571	220972	3614.8	1171.4	335.7	61.1298
	64746.9	1425.1	434.6	200.5	45.4332	2.16758	0.461344		131491	1917	826.4	213.2	68.5922	3.87617	0.257986	101024	2557.2	1060	182.9	39.5057	5.79552	0.172547	443890	4715	1337.2	531.1	94.1443	2.51779	0.397173		14939.6	961.2	393.3	56.6	15.5427	6.94876	0.143911	156048	3402.2	1063.4	234.6	45.8667	4.53282	0.220613	160438	4634.1	1585.2	174	34.6211
	154623	3669.7	1129.9	199.2	42.1351	5.67219	0.176299		98382.7	2370.2	1087.4	127.6	41.5082	8.52194	0.117344	145397	3260.5	975.3	294.9	44.5934	3.30722	0.302369	114803	1903.9	712.1	214.1	60.2987	3.32602	0.30066		65106.9	1185.3	416.7	203.9	54.9286	2.04365	0.489321	25676.7	875.4	295.8	126	29.3314	2.34762	0.425963	359860	3883.9	1318.2	374.3	92.6542
	50628.5	1555.9	469.1	168.5	32.5397	2.78398	0.359198		128287	1773.5	648.9	265	72.3357	2.44868	0.408383	45407	1847.7	498.5	150.5	24.5749	3.31229	0.301906	29281.1	1238.5	451.3	130.2	23.6424	3.46621	0.2885		57817	1863.6	534	201.4	31.0244	2.65144	0.377154	56772.7	1613.5	516	166.9	35.1861	3.09167	0.32345	13930.8	1114.7	274.7	86.5	12.4974
	51875.6	1156.5	394.5	185	44.8557	2.13243	0.468948		361639	4684.9	1926	308	77.1924	6.25325	0.159917	209809	4204.8	1373.4	401.4	49.8975	3.42152	0.292267	20977.4	957.7	284.7	112.5	21.9039	2.53067	0.395153		43414.7	1168.5	528.1	108.7	37.1542	4.85833	0.205832	59160.4	1475.3	392.2	237.2	40.1006	1.65346	0.604793	91255	2998.5	702.7	489.6	30.4336
	64047.3	1806.1	858.1	99.4	35.4617	8.6328	0.115837		305358	3152.5	1119	401.7	96.8621	2.78566	0.358981	89130.9	2151.2	936.1	136.1	41.4331	6.87803	0.14539	165380	3846.9	941.7	283.5	42.9906	3.32169	0.301051		66014.3	1640.6	695.9	133.3	40.2379	5.22056	0.191551	74880.7	1487.9	530	184.7	50.3264	2.86952	0.348491	337600	2892.6	995.5	442.5	116.711
	77527	1628.1	716.1	141.1	47.6181	5.07512	0.19704		284162	4411.3	2033.7	185.4	64.417	10.9693	0.0911639	468376	8811.6	2274.5	622.3	53.1545	3.65499	0.273599	293744	2820.9	998.7	389.8	104.131	2.56208	0.390307		14376.9	675.7	292.4	64	21.277	4.56875	0.218878	869435	7301.1	2285.7	543.5	119.083	4.20552	0.237783	765238	6954.1	1725.6	826.4	110.041
	17905.3	859.7	287.8	86.1	20.8274	3.34262	0.299166		458070	6193.6	1788.3	578.9	73.9586	3.08913	0.323715	89419.9	1654.7	745.4	158.2	54.0399	4.71176	0.212235	103640	1418.9	438.6	320.4	73.0423	1.36891	0.730506		167069	3340.5	1694.4	147.2	50.0131	11.5109	0.0868744	178612	3850.1	925.7	498.7	46.3914	1.85623	0.538727	539156	4487	1083.3	702.6	120.159
	278191	3995.3	1955.6	193.2	69.6295	10.1222	0.0987932		39572.1	1044.1	414.4	126.4	37.9007	3.27848	0.305019	390266	6783.8	2096.8	489.7	57.5291	4.28181	0.233546	547338	8321	3545.8	698.7	65.7779	5.07485	0.19705		55262	1413.3	566.5	130.3	39.1014	4.34766	0.230009	23821.3	725.2	242.5	131.8	32.8479	1.83991	0.543505	31430.5	1384	565.8	101.3	22.7099
	52803.3	2045.8	902.1	137.1	25.8106	6.57987	0.151979		175205	3084.1	1123.6	355.9	56.8091	3.15707	0.31675	194575	2299.2	845.1	307.4	84.6274	2.74919	0.363744	199842	2734.6	1066.6	249.1	73.0792	4.28181	0.233546		80269.6	2464	1118.7	103.4	32.5769	10.8191	0.0924287	315096	4598.8	1110.1	550.7	68.5171	2.0158	0.496081	200273	3674	1229.9	249.3	54.511
	147181	2850.6	1150.9	176.9	51.6316	6.50594	0.153706		145386	2486.1	836.4	250.3	58.4797	3.34159	0.299259	223274	4128.8	1393.6	267.6	54.0771	5.20777	0.192021	343080	4395.5	1054.7	528.2	78.0525	1.99678	0.500806		37371.9	1128.6	504.2	97	33.1135	5.19794	0.192384	723719	7706.9	2290.7	453.5	93.9053	5.05116	0.197974	427851	4132	1155.3	492.2	103.546
	66546.6	2356.9	741.3	169.4	28.2348	4.37603	0.228517		114787	2460.4	944.4	180.1	46.654	5.24375	0.190703	132414	3405.9	890.4	377.8	38.8778	2.3568	0.424304	169269	3369.4	960.4	247.7	50.237	3.87727	0.257913		35328.9	1223.8	482.9	103.8	28.8682	4.65222	0.214951	134127	3744.7	1591.2	130.8	35.8179	12.1651	0.0822021	13920.7	609	238.6	81.7	22.8583
	35004.5	948.5	293.4	163.2	36.9051	1.79779	0.556237		80087.1	2260.1	989.7	140.5	35.4352	7.04413	0.141962	157781	2077	590.7	362.4	75.966	1.62997	0.613509	403188	5204.1	1254.6	477.6	77.4751	2.62688	0.380679		62541.7	1561.7	699.6	121.2	40.0472	5.77228	0.173242	63388.3	1809.7	543.8	170.4	35.027	3.19131	0.31335	188984	4035.8	1599.7	177.5	46.8268
	42552.9	1107.7	409.1	141.6	38.4155	2.88912	0.346126		46806.2	2005.8	540.3	153.5	23.3354	3.51987	0.284101	684628	10483.5	2756.4	657.8	65.3053	4.19033	0.238645	11558.3	781	244.9	99.7	14.7994	2.45637	0.407105		23035.5	976.7	448.1	68	23.585	6.58971	0.151752	127963	3816.2	1084.1	239.1	33.5315	4.53409	0.220552	601905	4864.6	1385.4	650.5	123.732
	118716	2562.2	1107.7	144.1	46.3337	7.68702	0.130089		108430	2874.5	782	222.5	37.7214	3.51461	0.284527	47323.2	1394	438.1	149.8	33.9478	2.92457	0.341931	301419	5469.4	1266.1	425.8	55.11	2.97346	0.336308		59576.1	1292.6	393.9	204.3	46.0901	1.92805	0.51866	498615	3872.2	1391.2	474.7	128.768	2.93069	0.341216	122914	3044.4	661.4	310.8	40.3737
	11426.5	1046.9	509.5	47.2	10.9146	10.7945	0.0926398		273720	3572	1435.6	314.7	76.6292	4.5618	0.219211	199412	2842.5	927	329.6	70.1536	2.8125	0.355556	96065.9	1688.6	462.2	278.6	56.8909	1.65901	0.602769		76660.1	1795.9	526.8	321.8	42.6862	1.63704	0.610858	190844	3706.7	1584.5	228.2	51.4863	6.94347	0.14402	25108.9	784.7	225.8	149	31.9981
	205591	2526.1	917.4	307.2	81.3868	2.98633	0.334859		729969	5755.1	2192.2	505.5	126.839	4.3367	0.23059	24150.8	1157.7	446.9	75.3	20.861	5.93493	0.168494	814152	7385.7	2023.4	549.7	110.234	3.68092	0.271671		133879	2850.2	733.8	480.7	46.9718	1.52652	0.655083	163206	2963.8	569.9	414	55.0663	1.37657	0.726443	16739.3	838.5	254.4	100.8	19.9634
	60382.1	1272.9	470.3	171.3	47.4366	2.74548	0.364236		156093	3402.2	1554.1	134.8	45.8801	11.5289	0.0867383	7842.4	463.6	183.9	56.9	16.9163	3.23199	0.309407	13657.1	656.3	302.1	62.1	20.8092	4.86473	0.205561		35602.7	1029.6	390.8	122.4	34.5792	3.19281	0.313204	36986.7	1041.2	408.3	120.6	35.5231	3.38557	0.295371	17413.5	691.5	250.3	93.4	25.1822
	22878.4	893.6	256.4	120.1	25.6025	2.13489	0.468409		10027.4	722.5	301.7	49.6	13.8788	6.08266	0.164402	70764.4	1842.6	653.8	162	38.4046	4.0358	0.247782	471702	5613.6	1189.4	608.7	84.0283	1.954	0.511771		53036.5	1691.3	570.9	144.1	31.3584	3.96183	0.252408	636281	4763.5	1885.2	459.8	133.574	4.10004	0.2439	526999	9788.8	1469	542	53.8369
	206767	3017.7	664.8	437.7	68.5182	1.51885	0.658394		305905	3271.9	1118.5	374.3	93.4947	2.98824	0.334645	45807.5	1420.5	583	106.9	32.2474	5.4537	0.183362	463256	4661.7	1682.1	417.9	99.3749	4.02513	0.248439		44935.5	1018.4	341	172.6	44.1236	1.97567	0.506158	186484	3683.2	812.5	334.8	50.6311	2.42682	0.412062	80675.1	1540.5	479.6	234	52.3694
	27045.5	966.7	338.7	117.5	27.9771	2.88255	0.346915		782540	5395.5	2010.8	554.8	145.036	3.62437	0.27591	71489.3	1468.6	436.5	226.1	48.6785	1.93056	0.517984	79990.7	1954	512.1	244	40.9369	2.09877	0.476469		181795	3511.8	1613.5	160.5	51.767	10.053	0.0994732	32145.3	960.8	401.7	107.3	33.4568	3.74371	0.267115	981434	13113.4	3370.6	1403.7	74.8421
	66171.4	2671.8	1200.9	143.4	24.7666	8.37448	0.11941		498073	5018.3	1792.3	372.1	99.2513	4.81672	0.20761	168620	3029.6	1127.5	228	55.6574	4.94518	0.202217	123198	3345.8	1346.4	126.2	36.8216	10.6688	0.0937314		10301.1	676.1	211.3	72.7	15.2361	2.90646	0.344061	8993.2	522.1	208.2	58.9	17.2251	3.5348	0.282901	150476	1891.4	553.4	371.4	79.5582
	42537.7	1167.2	482.4	118.2	36.4442	4.08122	0.245025		94377.8	2168.2	867.3	151.5	43.5282	5.72475	0.17468	16100.6	1007.2	337.3	73.9	15.9855	4.56428	0.219093	210889	4719.3	1337.2	447.7	44.6865	2.98682	0.334804		70921.5	1426.7	485.8	195.3	49.7102	2.48746	0.402017	44083.9	1597.4	708.4	83	27.5973	8.53494	0.117165	571706	7473.5	1900.9	752.7	76.4978
	41265.3	891.3	261	211.6	46.2979	1.23346	0.810728		132074	2323.5	821.7	219.6	56.8428	3.7418	0.267251	36302.3	861.7	307.3	153.3	42.1287	2.00457	0.498861	132561	3309.9	683.3	469	40.0498	1.45693	0.686375		33853.7	1560.5	569.2	95.5	21.6941	5.96021	0.167779	46841.7	1482.7	465.3	145.7	31.5922	3.19355	0.313131	13434	530.5	168.5	109.4	25.3233
	527045	5976.2	2031.1	366.5	88.1906	5.54188	0.180444		185217	2568	1011.8	241.5	72.1251	4.18965	0.238684	32221.4	924.1	347.8	119.4	34.8679	2.9129	0.343301	15330	755.7	213.9	110.4	20.2858	1.9375	0.516129		143055	2541.5	916.5	212	56.2875	4.32311	0.231315	576943	4625.2	1669	475.1	124.739	3.51294	0.284661	13479.6	581.5	213.5	81.3	23.1807
	292279	3741.5	1487	268.7	78.1181	5.53405	0.180699		29174.6	1033.7	442.4	87.4	28.2235	5.06178	0.197559	83382.2	2362.4	741.2	263.5	35.2955	2.8129	0.355505	79549.7	3055	1077.7	270	26.0392	3.99148	0.250534		67383	1577.7	446	259.3	42.7096	1.72002	0.58139	57751.1	1460	586.9	130.6	39.5555	4.49387	0.222525	709686	7394.5	2842.7	358.7	95.9749
	7817.1	891.3	392.2	35.7	8.77045	10.986	0.091025		53817.2	1382.2	503.8	152.9	38.9359	3.29496	0.303493	57588.9	1385.1	556.9	137.4	41.5774	4.05313	0.246723	602387	6129.5	1304.6	889.3	98.2766	1.467	0.681665		14295.8	819.3	236.6	91.9	17.4488	2.57454	0.388419	19350.1	1060.1	407.7	90.2	18.2531	4.51996	0.221241	10245.3	464.1	157	91	22.0756
	8217.6	496.8	192.4	60.6	16.5411	3.17492	0.314969		47571.7	1892.5	906.6	72.2	25.137	12.5568	0.0796382	7776.5	411	150.6	70	18.9209	2.15143	0.464807	120202	2527.8	995.9	170.8	47.5519	5.8308	0.171503		95254.8	2525.4	736.6	389.3	37.7187	1.89211	0.528509	844980	10735.9	3103.3	669.2	78.706	4.63733	0.215641	295326	4850.8	1408.7	391	60.8818
	131141	3165.7	800.7	249.9	41.4257	3.20408	0.312102		101328	2062.1	845.6	165.3	49.1383	5.11555	0.195482	98859.2	1938	694.6	196.2	51.0109	3.54027	0.282465	52164.6	1308.8	360.8	221	39.8568	1.63258	0.612528		44352.6	1859.8	411.6	225.8	23.848	1.82285	0.548591	227577	3494.3	1235.3	254.8	65.1282	4.84812	0.206266	80340.5	1479	447.5	259.3	54.3208
	35252.9	1183.7	400	123.6	29.782	3.23625	0.309		534355	4192.2	1368.2	523.9	127.464	2.61157	0.382912	113175	1801.6	682.7	223.3	62.8193	3.05732	0.327084	179595	2413.7	890.7	267.7	74.4066	3.32723	0.30055		48200.3	1540.4	605.5	112.4	31.2908	5.38701	0.185632	20734	1120.2	393.2	93.5	18.5092	4.20535	0.237792	27035.3	794.1	301.3	123.6	34.0452
	7665	535.3	151.8	73	14.3191	2.07945	0.480896		172533	3760	1315.3	319.8	45.8865	4.11288	0.243138	304699	3773.5	876.9	565.3	80.747	1.55121	0.644657	206463	2534.4	839.6	337.1	81.4643	2.49066	0.401501		267616	3240.1	916.1	450.9	82.595	2.03171	0.492195	159581	2469.1	1065.2	199.3	64.6312	5.34471	0.187101	843530	7612.1	2140.2	591.8	110.814
	9054	876.7	383.8	70.6	10.3274	5.43626	0.18395		616292	7633.1	2387	1098.6	80.7394	2.17277	0.460243	283559	5692.3	1643.4	396.6	49.8145	4.14372	0.241329	21499.5	698	185.2	167	30.8016	1.10898	0.901728		111117	3332.5	833.9	469.1	33.3435	1.77766	0.562537	386144	5289.9	1379.3	748.7	72.9966	1.84226	0.542812	697570	5596.6	1714.6	559.2	124.642
	137539	2935.2	612.8	318.3	46.8585	1.92523	0.519419		591422	7102.9	2708	570.8	83.2648	4.74422	0.210783	64615.1	1649.3	474.8	191.9	39.1773	2.47421	0.40417	76295.1	1426.6	420.1	242.9	53.4804	1.72952	0.578196		490038	7725.6	2743.3	432.9	63.4304	6.33703	0.157803	130888	3185.3	1022.7	205.6	41.0912	4.97422	0.201036	333493	3309.3	1072.1	409.5	100.775
	327050	5614.9	1768.6	272.8	58.2468	6.48314	0.154246		70759.3	1158.9	425.8	215.5	61.0573	1.97587	0.506106	66313.4	1736.9	754.9	116.5	38.1792	6.47983	0.154325	62805.3	1221.6	336.7	256	51.4123	1.31523	0.760321		87351.6	1618.8	557.9	208.6	53.9607	2.6745	0.373902	359657	8578.8	1945.4	288.1	41.9239	6.75252	0.148093	660427	7145.8	2166.2	473.1	92.4217
	18731.6	1036.5	390.5	79.9	18.072	4.88736	0.204609		512607	3459.8	1167.4	577.6	148.161	2.02112	0.494775	40119.6	1119.9	415.7	130.3	35.8243	3.19033	0.313447	144728	3146.5	1144.6	249.9	45.9963	4.58023	0.21833		45508.4	1122.2	430.3	137.4	40.5528	3.13173	0.319312	11233.9	752.1	212.2	83.2	14.9367	2.55048	0.392083	54227.8	2443.3	589.3	164.5	22.1945
	10980.4	503.5	197.8	76.9	21.8081	2.57217	0.388777		50927.6	1255.8	516	134	40.5539	3.85075	0.25969	40266.6	1257.2	410	132.8	32.0288	3.08735	0.323902	7984.4	895.5	448.1	41.4	8.91614	10.8237	0.0923901		155434	2723	1065.6	241.2	57.082	4.41791	0.226351	152235	2462.1	782.1	371.3	61.8315	2.10638	0.474747	725209	6275.2	2226.7	558.6	115.567
	210225	3381.9	1402.1	208.1	62.1617	6.73763	0.14842		169122	2170.9	900.2	247.4	77.904	3.63864	0.274828	26487.8	855.8	339.7	102.2	30.9509	3.32387	0.300854	297338	3703.9	1040.7	389.6	80.277	2.6712	0.374363		86398.5	1370.9	542.6	208.7	63.0232	2.5999	0.38463	664168	7814.5	2990	363.7	84.9917	8.22106	0.121639	498625	4332.4	1426.4	495.3	115.092
	267013	2463.9	783.2	452.6	108.37	1.73045	0.577886		100664	1823.5	717.4	188.5	55.2037	3.80584	0.262754	28348.3	1433.7	605.7	89.4	19.7728	6.77517	0.147598	10438	476.3	179.3	79.9	21.9148	2.24406	0.445622		70085	1445.9	579.3	158.4	48.4715	3.6572	0.273433	43034.5	1236.8	445.9	128.8	34.795	3.46196	0.288854	666165	9755	2195.5	540.8	68.2896
	602366	5523.9	1717.5	506.8	109.047	3.38891	0.29508		17347.6	813.7	312.1	87	21.3194	3.58736	0.278757	62622.8	1723	612.7	149.1	36.3452	4.10932	0.243349	521509	6023.8	2258.4	365.8	86.5747	6.17387	0.161973		56093.4	1543.9	623.5	127.4	36.3323	4.89403	0.20433	218452	4634.4	1825.3	196.5	47.1371	9.28906	0.107654	361010	5664	1625.4	407.7	63.7377
	89602.4	2978	1197.1	112.6	30.0881	10.6314	0.0940606		334173	3134	1160	383.3	106.628	3.02635	0.330431	10372.1	772.1	337.2	43.5	13.4336	7.75172	0.129004	267276	4832.5	1421.9	402.9	55.3081	3.52916	0.283353		834222	6822.4	2598.5	446.7	122.277	5.8171	0.171907	170541	2369	925.3	249.8	71.9886	3.70416	0.269966	777394	6195.5	2545	408.9	125.477
	523800	4689.8	1768.4	395.8	111.689	4.46791	0.223818		33351.9	1225.4	482.2	101	27.2172	4.77426	0.209457	159672	2691.8	954.3	223.2	59.318	4.27554	0.233889	1.02427e+06	9796.4	2701.9	675.3	104.555	4.00104	0.249935		68954.6	1353.5	532.1	174.2	50.9454	3.05454	0.327382	90225.9	3190.8	1277	199.1	28.2769	6.41386	0.155912	187098	2657	878.4	287.2	70.417
	402422	3405	1148.2	471	118.186	2.43779	0.410207		112947	1770.1	717.4	206	63.8084	3.48252	0.287148	13429	816.5	355.4	67.4	16.447	5.273	0.189645	102844	1927.8	812.4	171.4	53.3478	4.73979	0.21098		32895.6	868.7	330.2	131.7	37.8676	2.50721	0.398849	132911	3387.9	985.6	192.4	39.231	5.12266	0.195211	16141.1	1021.1	333.2	87.1	15.8076
	59170.5	1357.5	506.7	164.3	43.5878	3.08399	0.324255		325362	3108.4	1210.1	360.5	104.672	3.35673	0.297909	11264.3	617.8	218.3	78.6	18.2329	2.77735	0.360055	349670	3665.3	1215	381.3	95.4001	3.18647	0.313827		558536	5192.5	1907	392.5	107.566	4.8586	0.205821	132074	3599.5	1225.6	184.1	36.6924	6.65725	0.150212	12622.9	1090.4	224.3	122.7	11.5764
	195630	3741.5	1084.5	247.3	52.2865	4.38536	0.228031		719435	5057	1915.6	495.9	142.265	3.86288	0.258875	105019	1734.9	716.7	193.4	60.5329	3.70579	0.269848	25691.9	741.3	239.6	145.8	34.6579	1.64335	0.608514		20820.2	888.6	389.6	70.4	23.4303	5.53409	0.180698	279717	2769.1	911	407.5	101.014	2.23558	0.447311	335846	3839.8	1324.7	341.7	87.4643
	1.30318e+06	11328.5	5019.6	358.9	115.036	13.9861	0.0714997		41914.2	1441.3	621.4	89.5	29.0808	6.94302	0.14403	48514.6	1701.8	804.9	85.9	28.5078	9.3702	0.106721	26923.8	788.9	275.6	128.2	34.1283	2.14977	0.465167		37072.8	1086.6	461.4	106.4	34.1182	4.33647	0.230603	48109	1541.5	446.7	150.1	31.2092	2.97602	0.33602	141498	2449.4	1083.9	175.4	57.7686
	103822	1762.2	487.6	278.7	58.9162	1.74955	0.571575		12805.4	1046.8	460.7	71.4	12.2329	6.45238	0.154982	9064.2	469.5	155.4	80.5	19.3061	1.93043	0.518018	11482.3	443.2	158.8	95	25.9077	1.67158	0.598237		265010	3138.4	1128.1	324.4	84.4412	3.4775	0.287563	180320	2621.6	646	419.5	68.7825	1.53993	0.649381	660979	8271.5	2610.2	422	79.9105
	8192.2	795.4	287.3	63.7	10.2995	4.5102	0.221719		209601	2130.8	712.7	388	98.3674	1.83686	0.544409	113277	3103.9	848.7	327.5	36.495	2.59145	0.385884	152697	2423.2	818.4	278.8	63.0145	2.93544	0.340665		122914	1913.6	804.6	203.8	64.2317	3.94799	0.253294	24749	766	214.8	150.9	32.3094	1.42346	0.702514	523790	4943.8	1880.6	379.2	105.949
	75798.3	1372.6	585.9	169	55.2224	3.46686	0.288445		74216.6	1416.9	597.8	164.2	52.3796	3.64068	0.274674	14270.5	621.2	244.2	77.6	22.9725	3.14691	0.317772	62805.3	1362.6	389.4	235.3	46.0923	1.65491	0.604263		98129.2	1783.8	794.3	166.2	55.0113	4.77918	0.209241	629113	7258.6	1895.3	641.7	86.6714	2.95356	0.338574	604638	5488.3	1394	839.3	110.168
	122427	2696.7	1190.7	158.1	45.3988	7.53131	0.132779		61771.2	1554.9	676.5	121.5	39.7268	5.5679	0.179601	240018	6647.1	2341.8	371.5	36.1086	6.30363	0.158639	229286	3837.2	1192.6	357.6	59.7534	3.33501	0.299849		35775.1	1048.1	419.4	115	34.1333	3.64696	0.274201	268316	2981.4	1121.5	311.1	89.9965	3.60495	0.277396	89313.4	4291.4	942.5	174.3	20.8122
	129661	2216	621.5	281.6	58.5113	2.20703	0.453097		427334	4687.2	1727.4	332.4	91.1704	5.19675	0.192428	8496.4	467.9	183.9	70.3	18.1586	2.61593	0.382273	30629.6	918.2	308.8	139.6	33.3583	2.21203	0.452073		137098	2776.1	1284.4	147	49.3851	8.73741	0.11445	119953	2134.9	780.3	204.2	56.1868	3.82125	0.261694	123563	2269.4	710.5	234	54.4473
	102418	3035.8	1299.9	206.4	33.7367	6.29797	0.158781		52625.9	1145.9	387.4	189.6	45.9254	2.04325	0.489417	7842.4	583.5	227.2	47.7	13.4403	4.7631	0.209947	413423	6108.5	2102.8	506.4	67.68	4.15245	0.240822		365552	3228.4	1147.2	425.4	113.23	2.69676	0.370816	206103	3031.4	1007.3	314.6	67.9895	3.20184	0.31232	20019.2	656.5	183.7	143.2	30.4938
	20931.7	639.2	184.7	148.2	32.7467	1.24629	0.802382		434588	5714.7	1581.4	650	76.0474	2.43292	0.411028	31684	1057.2	438.4	103.9	29.9697	4.21944	0.236998	458866	4808.3	1178.7	610.6	95.432	1.9304	0.518028		26112.7	994.9	433.2	80.7	26.2466	5.36803	0.186288	239698	3000.6	925.4	365.2	79.8835	2.53395	0.39464	127436	5192.1	1257.7	162.2	24.5442
	145726	1845.7	713.4	264.4	78.9544	2.69818	0.37062		16850.8	761.8	310.2	78.7	22.1197	3.94155	0.253707	75509.3	2247.5	905.3	119.2	33.597	7.5948	0.131669	99731.1	1634.3	498.1	278.1	61.0237	1.79108	0.558322		30578.9	856.7	315.6	129.4	35.6938	2.43895	0.410013	47840.3	2168.8	725.2	101.8	22.0584	7.12377	0.140375	18057.4	814.6	315.3	81.7	22.1672
	852995	7674.5	2599.1	525.4	111.147	4.9469	0.202147		144601	3535.2	1613.3	152.9	40.9031	10.5513	0.0947747	187316	2994.5	777.4	348.6	62.5533	2.23006	0.448418	22624.9	723.1	244.3	134.9	31.2888	1.81097	0.55219		50638.7	2055.3	928	79.6	24.6381	11.6583	0.0857759	115294	2058.8	556.9	275.5	56.0007	2.02142	0.494703	571848	10045.1	1758.9	629.5	56.9281
	7857.6	652.8	257.1	52.7	12.0368	4.87856	0.204979		427334	5643.9	1309.5	667.4	75.716	1.96209	0.50966	92552.8	2605.9	633.7	229.8	35.5166	2.75762	0.362632	153984	3267	1102.5	226.8	47.1332	4.86111	0.205714		14691.2	588.4	243.1	81.8	24.968	2.97188	0.336487	51561.3	1205.6	463.9	149.8	42.7682	3.0968	0.322914	282089	5716.4	1521.1	268.8	49.3473
	136449	3199.8	1241.5	157.2	42.643	7.89758	0.126621		896359	11835	2999.9	1075.3	75.7379	2.78983	0.358445	71585.6	1791.1	786.9	122.6	39.9674	6.41843	0.155801	16262.8	564.1	190.9	112.1	28.8296	1.70294	0.587218		298575	6315.2	1542.9	514.8	47.2788	2.99709	0.333657	814228	8875.6	1706.4	884.6	91.7379	1.92901	0.518401	201774	3685.8	1345.8	220.4	54.7436
	455348	4921.9	1397.4	532.5	92.5146	2.62423	0.381065		210123	2457	998.3	280.1	85.5203	3.56408	0.280577	108542	2274.8	891.5	161.5	47.7149	5.52012	0.181155	82312.5	1553.7	516.8	244.3	52.9784	2.11543	0.472717		10975.3	1392.9	666.7	23.7	7.87946	28.1308	0.0355482	153406	3412.1	990.6	233.6	44.9595	4.24058	0.235817	193151	3818.1	1051.3	315.2	50.5882
	160149	2910.9	1040.1	204.1	55.0169	5.09603	0.196231		692329	5310.5	2281.3	401.1	130.37	5.68761	0.175821	38096.9	1241.8	395.8	139.8	30.6788	2.83119	0.353209	415208	4062.7	1093.4	506.4	102.2	2.15916	0.463142		8795.5	756.9	299.8	52.9	11.6204	5.6673	0.176451	60569.7	1731.7	627.3	148.2	34.977	4.23279	0.236251	21884.8	990.8	363.8	88.3	22.088
	940346	4868.7	1820.9	678.1	193.141	2.6853	0.372398		1.13841e+06	11730	3120.3	1499.7	97.0515	2.08062	0.480627	332424	3972.5	1399.1	341.2	83.6812	4.10053	0.243871	14944.7	576.4	197.7	101.4	25.9277	1.9497	0.512898		226082	5152.8	1758.7	324.7	43.8755	5.41638	0.184625	118777	2443.5	737.9	222.4	48.6094	3.3179	0.301396	381217	4376.3	1377.8	390.4	87.1094
	272756	6768.7	2170	709.7	40.2967	3.05763	0.327051		305951	4290.1	1721.5	246.2	71.3156	6.99228	0.143015	7943.8	544.1	221.8	49.9	14.5999	4.44489	0.224977	59768.7	1717.4	501.4	192.8	34.8019	2.60062	0.384523		126366	2118.4	865.2	190.5	59.6516	4.54173	0.22018	147318	1970.7	753.4	260	74.7541	2.89769	0.345102	54329.2	1726.6	695.5	137.5	31.466
	71610.9	1456.1	575.8	167.2	49.1799	3.44378	0.290379		78388.8	1329.6	517.4	202.6	58.9567	2.5538	0.391573	201368	2216.6	839.3	320.8	90.8456	2.61627	0.382223	116400	2420.4	760.8	248.4	48.091	3.0628	0.326498		39572.1	1034.6	385.7	137	38.2487	2.81533	0.355198	163434	3040.5	1241.4	191.6	53.7523	6.47912	0.154342	421696	4871.4	1114.1	571.9	86.5658
	244504	2880.1	1106.5	289.5	84.8944	3.82211	0.261636		505880	3809.5	1458.6	463	132.794	3.15032	0.317428	12927.1	749.2	344.6	51.7	17.2545	6.66538	0.150029	29879.3	1011.4	373.2	106.7	29.5425	3.49766	0.285906		139258	1834.2	470	388.2	75.9228	1.21072	0.825957	769420	8430.6	3647.1	290.9	91.2651	12.5373	0.079762	797996	18900.7	2370.8	1641.3	42.2205
	146015	2593.5	1015.7	215.3	56.3004	4.7176	0.211972		660528	4402	1521.2	569	150.052	2.67346	0.374047	50887.1	1269.9	524.5	130	40.0717	4.03462	0.247855	725523	7676.6	1635	1035.8	94.511	1.57849	0.633517		1.13098e+06	9712	3057.9	955	116.452	3.20199	0.312306	7979.3	545.2	208.9	54.4	14.6355	3.84007	0.260412	22513.4	1074	279.8	114.9	20.9622
	176143	3254.3	876.1	357.7	54.1262	2.44926	0.408287		48605.8	1497.5	481.7	148.5	32.458	3.24377	0.308283	175094	2309.5	946.8	253.5	75.8145	3.73491	0.267744	196998	3823.8	1309.9	440.8	51.519	2.97164	0.336514		30771.5	845.1	312.4	134.5	36.4117	2.32268	0.430538	241498	2883.4	1068.7	302.4	83.7546	3.53406	0.282961	1.96082e+06	9380.3	3114	846.3	209.036
	206909	3651.3	1208.6	301.2	56.6673	4.01262	0.249214		176700	2053.7	771.7	298.2	86.0401	2.58786	0.38642	43171.4	1295.1	555.4	110.9	33.3344	5.00812	0.199676	108334	1427.5	436.7	328.6	75.8907	1.32897	0.752462		43678.3	1030.1	426.3	136.4	42.402	3.12537	0.319962	532352	6196.1	1298.6	715.2	85.9173	1.81572	0.550747	8268.3	535.1	185.5	74	15.4519
	8724.5	940.2	455.8	27.5	9.27941	16.5745	0.0603335		36560.8	970.9	403.7	120.7	37.6566	3.34466	0.298984	236895	5335.8	1121.1	709.9	44.3973	1.57924	0.633217	182500	2713	951.6	286.5	67.2687	3.32147	0.301072		25463.8	967.4	411.4	83.4	26.3219	4.93285	0.202722	439597	4423.3	1679.8	346.3	99.3821	4.85071	0.206155	11360.6	1067.4	290.1	100.3	10.6432
	9621.8	882	164.6	134.4	10.9091	1.2247	0.816525		1.23033e+06	13653	3515.5	1446	90.1141	2.43119	0.411321	226087	3595.2	1227.6	291.1	62.8858	4.21711	0.237129	21818.9	679.8	212	145.3	32.0961	1.45905	0.685377		67281.6	2388.2	1037.5	93.2	28.1725	11.132	0.0898313	177380	4606.9	1662.9	485.3	38.5031	3.42654	0.29184	17651.8	1075.9	311	81.2	16.4065
	163636	3093.7	996.6	242.2	52.8935	4.11478	0.243026		445046	6040.6	2361.2	386.1	73.6759	6.11551	0.163519	367839	5800.8	1582.3	570	63.4117	2.77596	0.360235	41300.8	906.9	286.8	197.6	45.5406	1.45142	0.688982		39414.9	1076.7	460.5	114	36.6071	4.03947	0.247557	718320	4571.7	1719.4	552.2	157.123	3.11373	0.321159	39982.7	2060.4	607.1	113.4	19.4053
	95533.6	3153.2	1093.2	180.7	30.2973	6.04981	0.165295		88269.1	2067	950.6	123.7	42.704	7.68472	0.130128	148266	2760.7	640.2	332.4	53.7059	1.92599	0.519213	59307.4	1294.4	485.9	172.5	45.8184	2.81681	0.355011		653157	5503.8	2358.6	367.8	118.674	6.41272	0.15594	468670	5151	1715.1	411.8	90.9862	4.16489	0.240103	82576.2	3503.3	1073	146.3	23.571
	246279	3392.3	909.9	466.4	72.5993	1.9509	0.512584		97596.9	3158.4	1505.2	87.4	30.9007	17.222	0.0580654	100917	2008.3	670.3	209.4	50.2502	3.20105	0.312397	76381.3	1138.8	349.7	287.8	67.0717	1.21508	0.822991		63398.5	1280.5	480.4	178.2	49.5107	2.69585	0.370941	893408	10360.1	2396.2	863.6	86.2355	2.77466	0.360404	705737	14997.8	3984.8	413.7	47.0561
	116364	1730.6	596.3	257.3	67.2391	2.31753	0.431494		416505	4034.4	1791.1	308.2	103.238	5.81149	0.172073	987943	8954.6	2814.6	642.8	110.328	4.37866	0.228381	171778	3365.4	981.1	355.5	51.0424	2.75977	0.362348		82028.7	1982.4	755.2	168.2	41.3785	4.48989	0.222722	36028.5	1026	435	111.2	35.1155	3.91187	0.255632	11776.3	698.8	225.6	80.2	16.8522
	9743.5	497.5	191.7	66.7	19.5849	2.87406	0.347939		133489	1897.6	773.5	225.3	70.346	3.4332	0.291273	279048	3444.3	1190.1	402.2	81.0172	2.95898	0.337955	19664.4	1040.9	334.2	87.3	18.8917	3.82818	0.261221		14873.7	712.7	311.2	65	20.8695	4.78769	0.208869	852974	7881.5	2653.4	436.5	108.225	6.07881	0.164506	60519	1756.3	595.1	139.3	34.4582
	676269	7106.6	1750.5	617.5	95.1607	2.83482	0.352756		597789	6964.5	2688.8	315.9	85.8337	8.51155	0.117487	7806.9	452.9	191.4	55.1	17.2376	3.47368	0.287879	437559	4230.6	1154.2	517.2	103.427	2.23163	0.448103		7928.6	530.3	246.1	43.3	14.9512	5.6836	0.175945	173091	3751.9	997.5	350.1	46.1343	2.84919	0.350977	391949	14180	2715.3	332.6	27.641
	30421.7	1765.5	599	93.4	17.2312	6.41328	0.155927		125763	2068.5	649.5	276.4	60.799	2.34986	0.425558	11178.1	538.4	208.1	72.6	20.7617	2.86639	0.348871	206412	4330.8	1216.5	522	47.6615	2.33046	0.4291		19416	712	296.6	86.4	27.2697	3.43287	0.291301	12714.2	746.4	269.8	71.7	17.034	3.7629	0.265752	15938.3	626.4	206.8	108.4	25.4443
	66146.1	1656.8	651.6	145.6	39.924	4.47527	0.22345		32850	1081.7	340.1	165.6	30.3689	2.05374	0.486916	51089.8	1229.5	479.5	142.5	41.5533	3.36491	0.297185	639257	6206.7	1874.6	514.4	102.995	3.64425	0.274405		79524.3	1462.5	554.5	189.7	54.3756	2.92304	0.34211	255971	3800.2	1447.3	259.9	67.3573	5.56868	0.179576	148530	2388	1033.6	190.9	62.1983
	77364.8	2311.8	997.7	116.9	33.4652	8.53464	0.117169		96461.4	1803.8	598	223.6	53.4768	2.67442	0.373913	23608.4	908.7	372.6	84.2	25.9804	4.42518	0.22598	33392.4	1054.2	364.5	127.4	31.6756	2.86107	0.34952		98291.4	2979.7	1398.6	120.3	32.987	11.6259	0.0860146	542892	7551.6	2331.7	347.9	71.891	6.70221	0.149204	62567.1	2357.6	727	158.9	26.5385
	350638	3697.3	1130	452.3	94.8363	2.49834	0.400265		30680.3	1253.7	596.9	69.2	24.4718	8.62572	0.115932	62085.5	1837.7	723.4	138.9	33.7844	5.20806	0.19201	303249	3847.2	1327.1	333.4	78.8233	3.9805	0.251224		20602.2	611.7	189	147.1	33.6802	1.28484	0.778307	1.14188e+06	11369.9	2781.8	867.3	100.43	3.20743	0.311777	899522	16007.8	4085.5	1361.4	56.1927
	86951.1	2718	1162.1	141.4	31.9908	8.21853	0.121676		51769.1	1083.5	387.8	175.7	47.7795	2.20717	0.453069	30908.4	1083	462	90.4	28.5396	5.11062	0.195671	20059.8	719.5	259.2	105.1	27.8802	2.46622	0.405478		70906.3	2301.4	963.5	99.1	30.8101	9.7225	0.102854	68853.2	2052	598.7	181.2	33.5542	3.30408	0.302656	38801.5	1210.7	366.7	150.9	32.0488
	16080.3	718.9	238.7	90.1	22.3679	2.64928	0.377461		27795.8	885.1	244	163.5	31.4041	1.49235	0.670082	294504	6966.7	2977.3	151.8	42.2731	19.6133	0.0509858	317808	4721.3	1701.1	294.9	67.3137	5.7684	0.173358		188274	2782.8	1142.1	229.3	67.6563	4.98081	0.200771	55429.3	1428.1	576	126	38.8133	4.57143	0.21875	216901	2847.1	1182	249.5	76.1832
	36545.6	1195.3	530.4	100.3	30.5744	5.28814	0.189103		242847	3177.9	1368.8	236	76.4173	5.8	0.172414	240134	4425.6	1709.1	442.1	54.2603	3.86587	0.258674	843165	8795.7	3993.6	281.3	95.861	14.1969	0.0704377		29899.6	1031.3	446	92.6	28.9921	4.81641	0.207623	625823	5683.7	2029	426.9	110.108	4.75287	0.210399	132054	2825.6	1097.6	167.6	46.7348
	426158	6592.1	2003.1	558.1	64.6467	3.58914	0.278618		231040	3971.4	1078.9	346.3	58.1759	3.11551	0.320975	174952	2589.5	982.9	252	67.5619	3.9004	0.256384	8937.4	618.5	191.7	70.8	14.4501	2.70763	0.369327		52651.2	1253.6	470.6	152.3	42	3.08995	0.323629	1.30021e+06	8603.9	2860.7	612.7	151.118	4.66901	0.214178	209307	2374.3	787	346.6	88.1553
	143673	2682.9	893.1	244.3	53.5514	3.65575	0.273542		85957.5	1346.3	479.8	241	63.8472	1.99087	0.502293	56311.4	1621.8	619.1	148	34.7215	4.18311	0.239057	154856	2708.1	1221.1	175.2	57.1826	6.96975	0.143477		18792.4	904	391.2	74	20.7881	5.28649	0.189162	242664	2723.7	883	376.4	89.0935	2.34591	0.426274	25656.4	907.9	357.7	101.9	28.2591
	43668.2	1501	578	108.9	29.0927	5.30762	0.188408		107406	2188.7	908.7	156.8	49.0731	5.79528	0.172554	31780.3	1062.8	417.3	104.1	29.9024	4.00865	0.249461	543130	5982.6	1397	556.3	90.7849	2.51123	0.39821		367215	4691.9	1752.7	321.6	78.2658	5.44994	0.183488	314432	4620.4	964.1	471	68.053	2.04692	0.488539	774636	9942	3027.9	869.5	77.9155
	86373.2	1858.3	774.4	151.4	46.4797	5.11493	0.195506		86008.2	1910.6	828.4	139.6	45.0163	5.9341	0.168518	161036	2057.4	749.2	293.1	78.2716	2.55612	0.391217	21671.9	653.5	206.9	142	33.1628	1.45704	0.686322		26356	1011.3	364.7	99.3	26.0615	3.67271	0.272279	545082	8092.2	1534.8	1360.9	67.3589	1.12778	0.886695	123755	2462	921.5	185.9	50.2661
	33093.3	1479.3	616.4	93.6	22.3709	6.58547	0.151849		67717.6	1290.6	467.2	196.1	52.4699	2.38246	0.419735	14321.2	844.2	324	74.2	16.9642	4.36658	0.229012	35207.3	1023.2	302.5	165.1	34.409	1.83222	0.545785		21139.6	2224.9	1062.2	128.8	9.50137	8.24689	0.121258	14143.7	746.5	332.4	56.4	18.9467	5.89362	0.169675	84056.4	1688.6	465.9	283.1	49.7788
	15309.7	819.3	244.1	90.6	18.6863	2.69426	0.371159		548869	5075	1968.5	376.9	108.151	5.22287	0.191466	21311.9	1085.1	383.3	93.1	19.6405	4.11708	0.242891	347358	5684.6	1992.9	452	61.1051	4.40907	0.226805		45386.7	2740.9	1349	144.8	16.559	9.3163	0.107339	751342	10546.3	1695	812	71.2422	2.08744	0.479056	259814	3227.9	939.7	432.9	80.4901
	199853	2724	1108.1	243.7	73.3673	4.54698	0.219926		140170	2018.7	753.1	246.1	69.4358	3.06014	0.326783	74480.3	2098.1	799.4	135.3	35.4989	5.90835	0.169252	121104	3618.8	861.5	441.6	33.4652	1.95086	0.512594		45452.6	1476.9	648.7	92.4	30.7757	7.02056	0.142439	291077	3958.1	1155.4	339.7	73.5397	3.40124	0.294011	157056	3676	1538.1	214.7	42.7248
	70521	2042.8	831.8	117.1	34.5217	7.10333	0.140779		453867	5752.9	1870.2	795.9	78.8936	2.34979	0.425569	127137	2626.8	913	226	48.3998	4.03982	0.247536	150274	2189.9	549.5	404.7	68.6212	1.3578	0.736488		38228.7	955.9	357.5	155.5	39.9924	2.29904	0.434965	400643	6803	1512.2	647.2	58.8921	2.33653	0.427986	150101	3229.6	1362.8	174.4	46.4767
	204968	2585.5	923	300.7	79.2758	3.0695	0.325785		255789	3332	1500.5	227.2	76.7674	6.60431	0.151416	17144.9	714.7	280.7	84.8	23.9889	3.31014	0.302102	97338.4	1987.5	714.4	196.5	48.9753	3.63562	0.275056		24901.1	1168.6	472.7	86	21.3085	5.49651	0.181934	232566	3343.2	858.4	395.6	69.5638	2.16987	0.460857	189694	2543.9	1004.4	253.3	74.568
	14042.4	673.9	188.2	101.5	20.8375	1.85419	0.53932		99837.6	2586.4	916.7	212.5	38.601	4.31388	0.23181	403639	6466.1	1600.4	395.7	62.4239	4.04448	0.247251	30715.8	854.2	256.1	170.1	35.9586	1.50558	0.664194		257969	4053.9	924.5	426	63.6347	2.17019	0.46079	12440.4	612.2	225.1	79.8	20.3208	2.8208	0.354509	226472	3016.3	1183.3	252.8	75.0828
	71418.3	1340.5	513.3	183.9	53.2774	2.79119	0.35827		102398	2406	915.7	162.7	42.5593	5.62815	0.177678	50907.3	1706.9	696.7	129.3	29.8244	5.38824	0.185589	172280	3156.4	736.9	383.8	54.5811	1.92001	0.520831		53361	1035.4	345	205.1	51.5366	1.68211	0.594493	31531.9	1442.1	593.4	95	21.8653	6.24632	0.160094	134644	2413.8	1096.3	162.7	55.7811
	108446	3507.9	1315.7	134.8	30.9146	9.76039	0.102455		129291	1936	678.9	260.9	66.7826	2.60215	0.384298	347830	3987.9	1118.5	446.1	87.2213	2.50729	0.398838	28976.9	998.4	397.3	101	29.0233	3.93366	0.254216		77663.9	1944.8	641.4	217.2	39.9341	2.95304	0.338634	15030.9	663.3	238.8	87.2	22.6608	2.73853	0.365159	293384	2808.8	861.9	463.5	104.452
	9444.4	497.9	197.5	62.5	18.9685	3.16	0.316456		117936	2547.3	1142.2	137.7	46.2982	8.29484	0.120557	31876.7	1065.6	454.8	95.1	29.9143	4.78233	0.209103	17048.5	791.3	258.8	107.1	21.5449	2.41643	0.413833		82084.4	1642	709.2	153.2	49.9905	4.62924	0.216018	35693.9	980.9	385.5	122.1	36.3889	3.15725	0.316732	33630.7	948.1	345.6	131.1	35.4717
	109601	1778.5	654.2	218.1	61.6258	2.99954	0.333384		369770	4520.6	1366.4	402.6	81.7967	3.39394	0.294643	89283	2363.9	1005	277.4	37.7694	3.62293	0.27602	195422	3416.8	1085.3	342.3	57.1944	3.17061	0.315397		259931	2516.3	999.9	339.2	103.299	2.94782	0.339234	14529	581.1	169.9	123.4	25.0026	1.37682	0.72631	41822.9	1197	552.1	101.1	34.9398
	37757.2	1038	426.4	120.3	36.375	3.54447	0.282129		97231.9	1733.2	534.7	242.6	56.0996	2.20404	0.453712	100030	2017.9	706.9	206.2	49.5714	3.42823	0.291696	148712	2030.5	510.9	386.3	73.2392	1.32255	0.756117		959686	8830.6	3304.2	482.5	108.677	6.84808	0.146026	201956	4180.6	1658.5	298	48.308	5.56544	0.17968	130949	2888	1266.8	170.4	45.3424
	221347	3033.8	1272.3	230.4	72.9603	5.52214	0.181089		201581	2537	1034.5	255.4	79.4566	4.05051	0.246883	10443.1	622.9	269.3	51	16.7653	5.28039	0.18938	204684	2521.1	723.7	396.9	81.1883	1.82338	0.548432		119243	1765.7	615	266.4	67.5332	2.30856	0.433171	8623.1	516	150.5	83.2	16.7114	1.80889	0.552824	51373.7	1109.3	377	182.1	46.3118
	40515	2088.3	728.5	106.6	19.4009	6.83396	0.146328		258739	3639.4	1468.9	246.6	71.0939	5.95661	0.167881	98286.4	1459.4	478.8	271.7	67.3471	1.76224	0.56746	254207	4690.9	1069.9	515.6	54.1916	2.07506	0.481914		30685.3	989	351.7	132.2	31.0266	2.66036	0.375889	596552	5233.7	1582.1	537.7	113.983	2.94235	0.339865	82185.8	1849.9	833.7	139.3	44.4272
	768178	5266.4	1636	622.9	145.864	2.62642	0.380746		52575.2	1482.4	687.1	109.7	35.4663	6.26345	0.159657	16942.1	861.1	387	61.1	19.675	6.33388	0.157881	13854.8	569.5	150.6	129.8	24.328	1.16025	0.861886		61766.1	1812.2	673.4	131.1	34.0835	5.13654	0.194684	266242	3528.9	1089	329.7	75.4462	3.303	0.302755	330837	3132.6	1273.7	343.4	105.611
	404684	5896.6	1867.9	312	68.63	5.98686	0.167032		67656.8	1405.4	589.9	151.1	48.1406	3.90404	0.256145	34375.9	831.6	291.2	154.9	41.3371	1.87992	0.531937	301373	5421.1	1307.1	539.1	55.5926	2.4246	0.41244		38613.9	1110.1	445	115.7	34.7842	3.84615	0.26	310503	3717.4	1136.4	415.4	83.527	2.73568	0.36554	195447	3194.7	1102.2	243.3	61.1786
	151226	3624.7	881.4	577.4	41.7211	1.5265	0.655094		314037	2954.6	1191.8	343.1	106.287	3.47362	0.287884	97470.2	1735.4	710.6	182.2	56.1658	3.90011	0.256403	13281.9	630.4	270.8	64.4	21.069	4.20497	0.237814		616627	9333.1	2085.6	576.3	66.0688	3.61895	0.276323	421134	5147.9	1318.3	482.2	81.8069	2.73393	0.365774	29042.8	1112.4	285.6	155.5	26.1082
	10965.2	662.2	263	57.1	16.5587	4.60595	0.21711		174495	2830.7	739.1	352.9	61.6439	2.09436	0.477473	61269.3	1452.7	599.7	137.6	42.1762	4.35828	0.229448	357213	6255.7	1695.9	519.2	57.102	3.26637	0.30615		691269	5290.5	2026.7	450.2	130.662	4.50178	0.222135	228044	5507.9	1302.8	368.3	41.403	3.53733	0.282699	13829.4	920.6	421.2	48.3	15.0222
	954693	11677.4	4772.4	309.3	81.7556	15.4297	0.0648102		62110.8	1715	726.4	118	36.2162	6.15593	0.162445	43318.4	1347.7	577	106.7	32.1425	5.40769	0.184922	34690.2	807	247.9	184.1	42.9866	1.34655	0.742638		23603.3	2323.5	1044.8	135	10.1585	7.73926	0.129211	25093.7	1443.9	640.2	53.5	17.3791	11.9664	0.0835676	334710	4998.9	1811.6	319.2	66.9567
	278540	3023.3	933.7	402.8	92.1313	2.31802	0.431402		43592.1	2305.6	930.1	218.9	18.9071	4.24897	0.235351	1.2262e+06	7172.7	2101.3	785.1	170.954	2.67647	0.373626	274059	3500.1	858.2	446	78.3004	1.92422	0.519692		37377	1015.8	378.1	131.2	36.7956	2.88186	0.346998	422426	8252.2	2259.8	405	51.1896	5.57975	0.179219	315928	3565	1369.5	308.7	88.6193
	277430	4137.5	1426.2	326.7	67.0526	4.36547	0.22907		131542	2386.5	990.9	178.4	55.1192	5.55437	0.180038	470896	3779.9	1270.5	491.9	124.579	2.58284	0.38717	169583	2266.3	542.2	432.2	74.8281	1.25451	0.797123		34163	1259.2	507.6	95.6	27.1307	5.30962	0.188337	56002.1	1920.7	630	171.4	29.1571	3.67561	0.272063	303502	3084.7	1011.9	400.2	98.3896
	399487	3854.1	1142.5	476.5	103.653	2.39769	0.417068		151490	3290.3	1288.4	177.9	46.0415	7.24227	0.138078	262445	3830.9	1097.5	360.7	68.5074	3.04269	0.328656	301525	4300.7	1155.7	522.3	70.1108	2.21271	0.451934		10149	845.2	400.7	62.5	12.0078	6.4112	0.155977	232338	4928.7	1880.4	184	47.1397	10.2196	0.0978515	46248.5	1157.1	426.7	144.9	39.9693
	548118	6163.2	1236.1	878.4	88.934	1.40722	0.710622		72482.9	1584	520.8	182.2	45.7594	2.8584	0.349846	598569	8928.7	3569.9	552.3	67.0388	6.4637	0.15471	16886.3	767.4	327.4	69.8	22.0046	4.69054	0.213195		224008	3543.5	1244.5	262.5	63.2167	4.74095	0.210928	13565.8	677.7	251.1	76.3	20.0174	3.29096	0.303863	27136.7	1036.6	391.8	100.5	26.1786
	125372	2225.4	731.4	257.6	56.337	2.83929	0.352201		9611.7	598.9	204.9	69.1	16.0489	2.96527	0.337238	105419	2476.1	963.6	299.6	42.5747	3.21629	0.310917	241919	4273.1	1624.9	262.5	56.6144	6.1901	0.161548		102154	1850.7	810.6	167.9	55.1977	4.82787	0.207131	260007	4541.9	1157.4	313.3	57.2462	3.69422	0.270693	946713	9638.1	2944.6	665	98.2261
	80502.8	1732.9	396.1	287.6	46.4555	1.37726	0.726079		311178	3264.9	788.7	553	95.31	1.42622	0.701154	54167	2195	833.3	144.5	24.6774	5.76678	0.173407	432880	4149	1624.5	366	104.334	4.43852	0.2253		28252	1348.7	579.3	71.4	20.9476	8.11345	0.123252	138016	3472	799.8	335	39.751	2.38746	0.418855	9332.8	471	186	70.2	19.8149
	384882	4497.7	1965	265.4	85.5731	7.40392	0.135064		303325	3720.7	1133.8	361.7	81.5236	3.13464	0.319016	169735	2108.2	773.5	287.6	80.5119	2.6895	0.371816	416531	4320.7	1682.5	330.6	96.4035	5.08923	0.196493		37554.4	990.4	295.2	170.1	37.9184	1.73545	0.57622	8395	449.4	154.9	80.7	18.6805	1.91945	0.520981	150284	1944.6	519.8	384.6	77.2825
	400562	5531.2	2263.8	249.4	72.4186	9.07698	0.110169		62425.1	1451.9	619.3	135.7	42.9955	4.56374	0.219118	710787	5523.7	1646.8	587.2	128.679	2.8045	0.35657	20323.4	765.8	303.9	96.9	26.5388	3.13622	0.318855		23476.6	1341.5	660.2	60.2	17.5003	10.9668	0.0911845	511253	7544.6	1708.9	477.2	67.7641	3.5811	0.279244	955920	10033.1	4103.9	309.3	95.2766
	378758	5418.8	1266.1	781.6	69.8971	1.61988	0.617329		164235	2360.8	929.9	242.4	69.5674	3.83622	0.260673	689211	5335.3	1672.3	571.8	129.179	2.92462	0.341924	236860	2483.6	773.6	406.1	95.3695	1.90495	0.524948		84548.2	1942	858.7	131.8	43.5367	6.51517	0.153488	1.11358e+06	11272.8	3356.6	614	98.7851	5.46678	0.182923	66526.3	1596.3	557.5	166	41.6753
	235156	2311	663.9	487.3	101.755	1.36241	0.733996		45589.5	1070.2	341.9	185.5	42.599	1.84313	0.542556	14909.2	753.4	322.9	77.5	19.7892	4.16645	0.240012	123654	1546.7	507.3	319.4	79.9469	1.58829	0.629608		15390.8	1157.3	585.3	40	13.2989	14.6325	0.068341	19603.5	808.8	189.8	142.9	24.2378	1.3282	0.752898	89531.4	1662.2	672.5	187.5	53.8632
	159657	3399.7	1064.7	314.7	46.9621	3.38322	0.295576		186844	2871.5	1193.6	218.1	65.0686	5.47272	0.182725	539546	11328.7	2448.1	901.6	47.6265	2.71528	0.368286	67230.9	1669.9	510.1	185.7	40.2604	2.7469	0.364046		17307.1	1180.2	539.3	47.2	14.6645	11.4258	0.0875209	81288.5	1966.6	660.9	186.8	41.3345	3.53801	0.282645	77973.1	1444.2	389.4	322	53.9905
	143120	2944.1	1043	205.2	48.6126	5.08285	0.19674		60296	1611.9	692.6	117	37.4068	5.91966	0.168929	115350	2074.9	882	170.3	55.5931	5.1791	0.193084	211872	3218.2	821.8	358.8	65.8357	2.29041	0.436603		233808	3592.2	827.9	489.5	65.0876	1.69132	0.591255	337346	3543.5	1249.2	354.2	95.2014	3.52682	0.283541	50557.6	1514.3	680.4	96.9	33.3868
	230244	2746.8	1136	271.9	83.8226	4.17801	0.239349		98864.3	1878.5	698.8	195.9	52.6294	3.56713	0.280338	10767.5	702.1	251.7	64.4	15.3361	3.90839	0.25586	109667	1554	613.4	239.2	70.571	2.56438	0.389958		14382	873.7	424.2	46.2	16.461	9.18182	0.108911	1.073e+06	7952.3	3296.9	439.9	134.929	7.49466	0.133428	122437	1962.8	730.1	244.2	62.3788
	49979.6	1307.8	486.7	135.4	38.2165	3.59453	0.2782		135349	2303.4	454.2	433	58.7606	1.04896	0.953325	532038	3517.3	1420.3	492.3	151.263	2.88503	0.346617									36697.7	1140	477.8	106.1	32.191	4.5033	0.222059	23106.5	1055.1	446.8	72.1	21.8998	6.19695	0.16137	78282.3	1865.7	724.3	150.5	41.9587
	129844	3225.5	1188.8	156.2	40.2553	7.61076	0.131393		538856	6533.1	1558.8	953.9	82.481	1.63413	0.611945	364447	3146.1	1147.3	416.5	115.841	2.75462	0.363026									22432.3	871.9	394.4	76.2	25.7281	5.17585	0.193205	33503.9	1281	523.6	128.1	26.1545	4.08743	0.244652	307112	3903.4	1583.7	296.4	78.678
	11543.1	598.5	223.3	73.5	19.2867	3.0381	0.329154		69197.9	1552.1	590.2	156.3	44.5834	3.77607	0.264825	724418	6000.1	1924	730	120.734	2.63562	0.379418									978904	9017.8	3410.4	426.9	108.552	7.98876	0.125176	133438	3339.4	1132.1	169.9	39.9586	6.66333	0.150075	186251	3596.7	879.4	307.6	51.7839
	129124	1776.8	736	230.9	72.6721	3.18753	0.313723		245483	4072.6	1272.9	407.6	60.2767	3.12291	0.320214	10970.3	752.6	356.8	42.2	14.5765	8.45498	0.118274									34700.3	1070.3	467.6	98	32.4211	4.77143	0.209581	1.93117e+06	13366.7	3656.9	1258.4	144.476	2.90599	0.344117	69578.1	1807.9	748.5	127.7	38.4856
	233169	3850.9	1546.5	265.2	60.5492	5.83145	0.171484		465993	4157.6	1578.6	396.6	112.082	3.98033	0.251235	17971.2	825.9	362	67.1	21.7595	5.39493	0.185359									238036	3612.5	1355.1	297.9	65.8922	4.54884	0.219836	720708	4675.2	1309.8	775.5	154.155	1.68897	0.592075	161954	2374.5	946.8	234.8	68.2053
	44469.2	1062.4	386.2	152.8	41.8573	2.52749	0.39565		163231	2477	864.6	256.3	65.8987	3.37339	0.296438	84441.7	2232.6	609.8	232.6	37.8221	2.62167	0.381437									29433.2	891	314.8	130.8	33.0339	2.40673	0.415502	179093	2716.6	1061.7	229.1	65.9255	4.63422	0.215786	426117	3585.1	1344.2	422.9	118.858
	394550	3413.2	1393.9	369.6	115.595	3.77137	0.265155		140636	3155.3	1302.9	177.7	44.5715	7.33202	0.136388	16475.7	726	304.3	71.1	22.6938	4.27989	0.233651									162825	2242.4	953.8	229.4	72.6121	4.1578	0.240512	224505	5477	1590.5	283.4	40.9906	5.61221	0.178183	636215	7088.3	3073.7	282.2	89.7557
	128556	2480.7	992.7	178.1	51.8225	5.57383	0.17941		10270.7	521.6	190.7	78.3	19.6908	2.4355	0.410593	49487.9	1579.6	764.8	86.3	31.3294	8.86211	0.11284									131182	1853	722.4	236.1	70.7944	3.05972	0.326827	21747.9	925.3	394.4	72.5	23.5036	5.44	0.183824	194114	3451.9	1426.7	184.4	56.234
	220916	4556.7	1235.3	289.9	48.4816	4.26112	0.23468		236545	3502.4	936.2	403.5	67.5381	2.3202	0.430998	63586	1548.3	669.8	126.4	41.0683	5.29905	0.188713									73486.6	1384.7	498	194.3	53.0704	2.56305	0.390161	563301	5177.7	1524.8	546.3	108.794	2.79114	0.358276	242847	4501.9	1934.5	184.2	53.9431
	12151.5	926.7	427.6	48.6	13.1127	8.79835	0.113658		481546	5958.6	1192.7	568.3	80.8154	2.09872	0.476482	30528.2	1351.5	472.5	106.6	22.5884	4.43246	0.225608									111066	1624.3	509.1	292.1	68.378	1.7429	0.573758	27405.4	960.7	301.3	124.5	28.5265	2.42008	0.413209	2.54753e+06	11824.9	4011.8	863.5	215.438
	254831	2906.3	896.1	391.6	87.6822	2.2883	0.437005		126919	2108.9	655.9	282.9	60.1824	2.31849	0.431316	8491.3	771.1	383.2	33.7	11.0119	11.3709	0.0879436									71281.4	1384.2	541.2	175.5	51.4965	3.08376	0.324279	13535.4	987.5	267.3	80.7	13.7067	3.31227	0.301908	27222.9	1147.9	477.8	79.3	23.7154
	324059	2672.3	883.1	488	121.266	1.80963	0.552599		186601	1957.9	634.4	382.8	95.3068	1.65726	0.603405	341153	2997.3	968.2	464.3	113.82	2.08529	0.47955									99067.1	1798.3	620.6	249.9	55.0893	2.48339	0.402675	315294	6971.3	2791.1	190	45.2274	14.69	0.0680735	15644.3	1192.9	496.2	54.2	13.1145
	242243	2644.8	784.7	419.5	91.5923	1.87056	0.534599		55515.5	1392.7	614.6	120.1	39.8618	5.1174	0.195412	59500	1312.2	527.8	149.6	45.3437	3.52807	0.283441									31303.8	2013.6	923.7	99.8	15.5462	9.25551	0.108044	141666	2411.3	777	242.6	58.7507	3.2028	0.312227	384781	4317.1	1541.4	340.2	89.1295
	381714	7478.1	2040.4	314.8	51.0442	6.48158	0.154283		851261	8354.9	2666.1	506.2	101.888	5.26689	0.189865	180690	2513.7	1005.3	245.6	71.8821	4.09324	0.244305									7746.1	449.7	184.8	55.5	17.225	3.32973	0.300325	7994.5	699.6	194.4	65.8	11.4272	2.95441	0.338477	642587	5176.4	1960.7	452.6	124.138
	122949	3013.5	871.2	400.2	40.7995	2.17691	0.459366		441569	3725.7	1330	447.5	118.52	2.97207	0.336466	285775	2891	1012.5	390.5	98.8497	2.59283	0.385679									28698.1	1312.4	577.4	81.4	21.8669	7.09337	0.140977	109561	2300.8	962.8	151.4	47.6186	6.35931	0.15725	2.71709e+06	12176.6	5249.5	684.4	223.14
	240266	4114.1	1341.4	303.1	58.4007	4.4256	0.225958		145376	2491.6	784.4	293.4	58.3466	2.67348	0.374044	12364.4	592.2	249.2	66.3	20.8788	3.75867	0.266051									295163	3942.1	1740.8	234.7	74.8746	7.41713	0.134823	64290.7	1678.9	727.5	123.3	38.2933	5.90024	0.169485	80553.4	1958.3	823.8	132.4	41.1344
	88162.7	2327.8	1037.5	138.5	37.8738	7.49097	0.133494		317043	4984.2	1299	460.6	63.6096	2.82023	0.35458	52894.6	1960.9	697.4	133.7	26.9747	5.21616	0.191712									111573	1970.9	829.9	180	56.6104	4.61056	0.216894	65203.2	1968.6	469.8	213.7	33.1216	2.19841	0.454874	33270.8	1689.7	488.9	163.5	19.6904
	67631.4	1650.5	532.9	181.6	40.9763	2.93447	0.340777		71763	1461.3	575.1	167.5	49.109	3.43343	0.291254	120212	2940.5	1038.5	162.2	40.8814	6.40259	0.156187									88502.3	1579.1	583.9	203.3	56.046	2.87211	0.348176	311958	4149.8	1754.5	239.1	75.1743	7.33793	0.136278	849669	7342.6	2300.1	559	115.718
	126361	3100.4	1187.2	150.2	40.7563	7.90413	0.126516		83448.1	1913.4	816	144.9	43.6125	5.63147	0.177574	13788.9	710.5	282.7	69.8	19.4073	4.05014	0.246905									53411.6	2239.8	1006.6	82.7	23.8466	12.1717	0.0821578	891132	7403.2	1837.2	669.3	120.371	2.74496	0.364304	103260	2302.8	784.8	208.4	44.8408
	66460.4	2625	1217.1	78.1	25.3182	15.5839	0.0641689		34254.2	1380.5	637.2	79	24.8129	8.06582	0.12398	91898.9	1896.5	700.9	178.6	48.4571	3.92441	0.254815									37807.9	1149.3	423.9	126.8	32.8965	3.34306	0.299127	502128	4785	1448.6	460.2	104.938	3.14776	0.317686	458977	4255.9	1551.7	414.7	107.845
	386976	3448	1075.4	488.5	112.232	2.20143	0.45425		226270	3384	903	502.9	66.8645	1.79559	0.556921	48763	1546.6	593.4	131.3	31.5292	4.51942	0.221267									25828.8	951	338.3	106.1	27.1596	3.1885	0.313627	22209.2	933.6	359.6	86.2	23.7888	4.17169	0.239711	1.05722e+06	11783	3773.5	450.8	89.7244
	41544.1	1183.2	347.4	178.9	35.1116	1.94187	0.514968		663154	5817.5	2124.2	430.7	113.993	4.93197	0.202759	121373	2897.9	1278.3	192.5	41.8829	6.64052	0.150591									213758	3377.5	1086.1	350.7	63.2889	3.09695	0.322898	1.32268e+06	10237.4	2650.3	757.5	129.201	3.49875	0.285817	49969.5	1074.8	343.1	198.8	46.4919
	155723	2127.4	811.8	251.7	73.1988	3.22527	0.310052		81476.1	1507.3	600.4	180.8	54.0543	3.3208	0.301133	53051.7	1316.2	569.6	132	40.3067	4.31515	0.231742									483807	7565.1	2918.3	299	63.9525	9.7602	0.102457	266409	2782.5	854.4	427.8	95.7446	1.99719	0.500702	85501.2	2262.1	560.4	256.7	37.7973
	35136.3	1758.9	572	182.8	19.9763	3.1291	0.31958		111751	2519.3	1170.3	137	44.3579	8.54234	0.117064	78845	2009.8	670.4	199.4	39.2303	3.36209	0.297434									401211	5004.3	1649.4	397.3	80.1732	4.15152	0.240875	15482.1	828.6	169.2	130.2	18.6846	1.29954	0.769504	134959	2429.1	1089.7	165.5	55.5591
	73562.7	4771.4	2201	97.9	15.4174	22.4821	0.0444798		56777.8	1094.3	439.5	170.1	51.885	2.58377	0.387031	511644	9808.2	2483.7	1094.3	52.1649	2.26967	0.440593									37889	1409.6	516.9	118.6	26.8793	4.35835	0.229445	19056	784.2	238.7	115.3	24.2999	2.07025	0.483033	70510.9	1768.9	687.5	151.5	39.8614
	327354	4879.5	1824.8	247.8	67.0877	7.364	0.135796		314949	3994.1	1798.3	237.7	78.8536	7.56542	0.13218	57553.4	1483.9	544.4	160.1	38.7852	3.40037	0.294085									56093.4	1697.4	788.9	100.8	33.0467	7.82639	0.127773	7903.3	456.3	157.7	68.2	17.3204	2.31232	0.432467	75331.9	2181.7	760.2	158.1	34.529
	44210.6	1420.3	427.5	143.4	31.1276	2.98117	0.335439		104988	2315.1	1092.7	130.4	45.3493	8.3796	0.119337	175773	3457.1	1391.9	217.2	50.844	6.40838	0.156046									43460.3	1113.7	408	150.2	39.0233	2.71638	0.368137	247571	3814.1	1134.7	316.7	64.9095	3.58289	0.279105	394504	3496.9	1028.2	508	112.815
	59591.3	1475.1	481.5	165.8	40.3981	2.9041	0.344341		220105	2167	748.4	389.1	101.571	1.92341	0.519909	47779.5	1265.7	529.4	120.2	37.7495	4.40433	0.227049									22898.7	719.6	265.4	113.6	31.8214	2.33627	0.428033	76158.2	2032	535.4	210.5	37.4794	2.54347	0.393164	427065	5385.1	2041.9	318.2	79.305
	599563	5219.1	1848.6	442.1	114.879	4.18141	0.239154		229230	3571.7	1561	205.5	64.1796	7.59611	0.131646	71646.4	1516.6	565.7	168.3	47.2415	3.36126	0.297508									7639.7	1073.7	559.1	33.8	7.1153	16.5414	0.0604543	580857	5723.9	1385.5	579.9	101.479	2.38921	0.418549	88608.8	1487.5	599.2	195.1	59.5689
	31780.3	2091.1	940.4	56.8	15.1979	16.5563	0.0603998		85496.2	1512.6	427.9	267.5	56.5227	1.59963	0.625146	8668.7	580.3	241.9	48.5	14.9383	4.98763	0.200496									914223	7524.9	3143.1	408.5	121.493	7.69425	0.129967	704561	8519.6	1842.3	598.6	82.6989	3.07768	0.32492	243105	4002	1338.7	268.1	60.7459
	153330	2118	811.4	249.7	72.394	3.2495	0.30774		92912.7	1633.3	496.7	249.4	56.8865	1.99158	0.502114	19608.6	1335.3	625.1	88.2	14.6848	7.0873	0.141097									177446	2334.2	906.4	260.3	76.0199	3.48214	0.28718	719075	5804.5	1764.1	604.4	123.882	2.91876	0.342611	959245	6130.1	2417.5	524	156.481
	9474.8	520.4	203	67.1	18.2068	3.02534	0.330542		38203.3	1152.7	476	105.6	33.1424	4.50758	0.221849	124049	1784.7	652.4	255	69.5071	2.55843	0.390865									45133.2	1019	406.6	143.2	44.2917	2.83939	0.352189	148869	3212.9	956.6	264.9	46.3349	3.61117	0.276918	306149	4802.3	1672.8	293.9	63.7504
	128992	3394.7	1068	256.7	37.9981	4.1605	0.240356		154172	2864.1	778.7	304.8	53.8291	2.55479	0.391422	27440.9	914	382.3	95.2	30.0229	4.01576	0.249019									30239.2	937.9	395.3	111.6	32.2414	3.54211	0.282317								235597	2686	1051.4	290.9	87.7131
	148094	2084.9	855.4	228.9	71.0315	3.737	0.267594		19213.2	816.8	376.8	73	23.5225	5.16164	0.193737	44905.1	1456.7	643.6	94.8	30.8266	6.78903	0.147296									54881.8	1076.8	424.2	170.6	50.9675	2.48652	0.402169					59.2053	4.02888	0.315325	123025	2033	826.9	212.3	60.5141
	239344	5940.4	2565.6	131	40.2908	19.5847	0.0510602		146684	1761.8	540.3	357.7	83.2582	1.51048	0.66204	176569	4616.1	1789.8	360.1	38.2506	4.97029	0.201196									23608.4	934.9	358.9	100.2	25.2523	3.58184	0.279186					33.4653	2.22072	0.152952	230731	3203.4	1371.1	227.7	72.0268
	113667	1978.2	658.5	244.1	57.4598	2.69766	0.370691		8101	672.8	293	41.7	12.0407	7.02638	0.142321	115137	1889.1	571.8	287.7	60.9482	1.98749	0.503148									1.00312e+06	6592.5	2521	526.1	152.161	4.79186	0.208687								32302.5	1234.1	553.2	78	26.1749
	275550	4203.9	1518.8	293.9	65.5462	5.16774	0.193508		1.89725e+06	17703.6	3973.3	1097.3	107.168	3.62098	0.276168	187362	3644	1263.4	226	51.4164	5.59027	0.178882									782986	5834.2	2181.2	519.9	134.206	4.19542	0.238355
	288887	4719.8	2056.2	215.4	61.2075	9.54596	0.104756		103498	1830.7	769	178.3	56.5345	4.31296	0.23186	156367	2986.1	876.4	364.1	52.365	2.40703	0.41545									49280.1	1116.6	418.3	157.1	44.1341	2.66264	0.375568
	671944	8292.4	2454.8	371.9	81.0314	6.6007	0.151499		57173.2	1197.1	451.4	167.3	47.7598	2.69815	0.370625	65436.4	1971.6	603.4	191.7	33.1895	3.14763	0.3177									239638	3512.7	1365.3	246.5	68.2203	5.53874	0.180546												59.0431
	35460.8	907.2	332.5	140	39.0882	2.375	0.421053		404116	3242.6	1203.3	440.6	124.627	2.73105	0.36616	54248.1	1364.2	550.6	135.6	39.7655	4.06047	0.246277									20881	1093.5	489.4	70.4	19.0956	6.9517	0.14385												37.6188
	496932	8306.9	3688.4	186.6	59.8216	19.7663	0.050591		160625	2743.2	1192.2	190.9	58.554	6.24515	0.160124	8618.1	603.5	227.7	58.5	14.2802	3.89231	0.256917									490195	5246.7	1505.4	440.1	93.4292	3.42059	0.292348
	551459	6432.3	2704.1	270.4	85.7328	10.0004	0.0999963		7675.1	656.9	313.1	36.8	11.6838	8.50815	0.117534	176837	2070.6	643.3	385	85.4039	1.67091	0.598477									71626.2	1322.8	500.4	195.8	54.1474	2.55567	0.391287
									663646	8513.1	2890.5	1068.8	77.9558	2.70443	0.369763	21560.3	887.9	368.9	85.3	24.2824	4.32474	0.231228									75022.7	1670.4	676	148.7	44.913	4.54607	0.21997
									429123	4234.7	1372.8	438	101.335	3.13425	0.319056	177101	3361	1457.6	168.3	52.6929	8.66072	0.115464									1.22954e+06	12368.6	2926.4	1161.4	99.4084	2.51972	0.39687
									299219	3077.8	1191.3	337.6	97.2184	3.52873	0.283388	13058.9	601	233	77	21.7286	3.02597	0.330472									33113.6	1301	555.6	85.2	25.4524	6.52113	0.153348
									77552.3	1630.5	475.2	229.5	47.5635	2.07059	0.482955	20490.7	1425.5	638.5	95.3	14.3744	6.6999	0.149256									55839.9	1201.8	482.5	149.8	46.4636	3.22096	0.310466
									193242	2429.6	1003.6	268.3	79.5366	3.74059	0.267338	126097	1808.1	655.3	257.8	69.7402	2.54189	0.393408									25930.2	931.8	403.8	85.6	27.8281	4.71729	0.211986
									18462.9	860.6	362.3	68.1	21.4535	5.32012	0.187966	456432	7353.3	2637.9	566.2	62.0718	4.65895	0.21464									30436.9	1423	557.9	75.9	21.3892	7.35046	0.136046
									1202482	17954.1	4430.2	1022.9	66.9753	4.33102	0.230893	47789.6	1501.1	648.6	100.3	31.8364	6.4666	0.154641									377998	4120.6	1618.9	317.2	91.7337	5.10372	0.195936
									155389	3400.7	1448.4	148.4	45.6931	9.76011	0.102458	197379	4596.8	1801.5	370.6	42.9383	4.86104	0.205717									49675.5	1824.8	861	91.6	27.2224	9.39956	0.106388
									57031.2	1053.3	379.7	194.1	54.1453	1.95621	0.511193	276396	4174.2	854.4	504.9	66.2154	1.69222	0.590941									33463.4	835.5	290.4	152.4	40.0519	1.90551	0.524793
									43506	1200.5	505.9	112.9	36.2399	4.48096	0.223167	35780.1	1903.4	1157.2	99.9	18.798	11.5836	0.0863291									583985	7048	1596.4	788	82.8582	2.02589	0.493611
									2.29222e+06	13923.9	3951.1	881.4	164.625	4.48275	0.223077	92441.3	2354.2	771.1	249.2	39.2665	3.0943	0.323175									367286	5531.1	2230.9	268.2	66.4038	8.31805	0.120221
									165669	1932.9	643.1	341.9	85.7103	1.88096	0.531644	69339.8	2161.3	985	98.9	32.0825	9.95956	0.100406									40925.6	1056.6	363.9	155.8	38.7333	2.33569	0.42814
									910193	5753.8	2035.9	592.4	158.19	3.4367	0.290977	66277.9	1422.5	540.6	172.2	46.5925	3.13937	0.318535									242233	3678.8	1631.4	197.9	65.8457	8.24356	0.121307
									453604	4100.5	1444.2	420.6	110.622	3.43367	0.291234	503750	4882.7	1764.3	408	103.17	4.32426	0.231253									297302	3515.6	930.7	458.9	84.5666	2.02811	0.49307
									105510	3773.2	1601.2	97	27.9631	16.5072	0.0605796	74165.9	1617.5	518.1	199.6	45.8522	2.59569	0.385254									196030	2415.9	957.1	264.9	81.1417	3.61306	0.276774
									14382	774.6	308.6	72.2	18.567	4.27424	0.23396	155029	2484.3	887.6	254.6	62.4033	3.48625	0.286841									266480	5700.4	1238.4	691.9	46.7476	1.78985	0.558705
									9459.6	501.7	197.9	62.5	18.8551	3.1664	0.315816	126716	2368.1	779	229.5	53.5095	3.39434	0.294608									10990.6	507.6	166.8	93	21.6521	1.79355	0.557554
									7766.4	609.1	226.5	66.9	12.7506	3.38565	0.295364	471671	4836.6	1451.1	489.2	97.5212	2.96627	0.337124									1142698	14042.5	4267.4	524.5	81.3743	8.13613	0.122909
									128444	1969	776.6	224.6	65.2334	3.4577	0.289209	494742	5284.6	1251	576	93.6196	2.17188	0.460432									55921	1087.9	359.9	208.2	51.4027	1.72863	0.578494
									601124	6375.3	2322.4	374.3	94.2896	6.20465	0.161169	315730	3802.1	1233.8	447.6	83.041	2.75648	0.362782									63575.9	1403.3	394.5	235.5	45.3046	1.67516	0.596958
									613509	8663.6	2753.3	554.2	70.8146	4.96806	0.201286	53959.1	1455.3	573	129.7	37.0776	4.41789	0.226353									24003.8	955.7	323.7	135.6	25.1165	2.38717	0.418906
									56488.8	1213.8	463	160.3	46.5388	2.88833	0.34622	116648	1817.8	603.6	265.9	64.1698	2.27003	0.440524									31714.4	1256	579.1	72.5	25.2503	7.98759	0.125194
									59099.6	1516.8	669.1	114.6	38.9633	5.83857	0.171275	19137.1	979.3	308.6	97.8	19.5416	3.15542	0.316915									42593.5	1057.6	429.7	133.1	40.2737	3.2284	0.309751
									427795	3278.2	1230.6	456.4	130.497	2.69632	0.370876	292821	3082.7	1002	384.3	94.9885	2.60734	0.383533									22285.3	1042.3	501.2	59.1	21.3809	8.48054	0.117917
									100066	3292.2	1580.7	86.1	30.3948	18.3589	0.0544695	52722.2	2676.8	1141.4	135.8	19.696	8.40501	0.118977									355221	4897	1838.9	259.7	72.5385	7.08086	0.141226
									9180.8	640.9	256.2	60.9	14.3249	4.2069	0.237705	62719.1	1329.6	504.6	173.9	47.1714	2.90167	0.344629									919602	6791.9	2940.2	411.5	135.397	7.14508	0.139956
									360164	3696.3	1473.6	325.9	97.439	4.52163	0.221159	26269.9	881.7	353.9	102.6	29.7946	3.44932	0.289912									197039	2857.9	1088.6	246.3	68.9454	4.41981	0.226254
									762018	7626.4	1906	911.4	99.9185	2.09129	0.478174	18026.9	704.8	258.1	94.6	25.5773	2.72833	0.366525									1.04999e+06	5448.2	2027.1	699.5	192.723	2.89793	0.345074
									40900.3	1199.3	347.1	161	34.1035	2.1559	0.463843	105069	3152.2	1301	181.7	33.3321	7.16015	0.139662									9936.1	466.2	150.1	89.4	21.313	1.67897	0.595603
									167241	2950.6	1207.7	196.5	56.6803	6.14606	0.162706	148459	3981.5	1725.6	125.8	37.2871	13.717	0.0729022									133362	2506.2	1015.6	193.4	53.2128	5.25129	0.190429
									242096	3238.4	1141.9	363.6	74.758	3.14054	0.318417	472827	5342	2063.3	432.8	88.5112	4.76733	0.209761									73973.3	1549.6	505.3	221.3	47.737	2.28333	0.437958
									44666.9	1192.8	498.6	117.1	37.4471	4.2579	0.234858	75985.9	1602.3	695.9	146.5	47.423	4.75017	0.210519									110641	2124.1	612	327.3	52.0882	1.86984	0.534804
									41468	1460	611	100.3	28.4027	6.09172	0.164157	19471.7	819.7	359.8	83.3	23.7547	4.31933	0.231518									36961.3	1047.7	440.7	110.9	35.2785	3.97385	0.251645
																597155	8020.6	3197.6	312.9	74.4527	10.2192	0.0978546									26224.2	832.7	335.8	104.1	31.493	3.22574	0.310006
																39546.7	1471.5	668.7	87.7	26.8751	7.62486	0.13115									55287.3	1319.4	478.9	157.8	41.9034	3.03485	0.329505
																107188	2261.6	901.3	174	47.3949	5.17989	0.193054									458556	4609.9	1452.7	462.8	99.4721	3.13894	0.318579
																13682.4	589	216	87.7	23.2299	2.46294	0.406019									10412.6	474.7	179.2	78.2	21.9351	2.29156	0.436384
																19568	1273.4	514.9	62.4	15.3667	8.2516	0.121189									334157	6437.1	1840.5	1270.8	51.9112	1.4483	0.690465
																822254	6769.3	1648	716.5	121.468	2.30007	0.434769									554577	3787.3	1438.1	509.7	146.431	2.82146	0.354426
																69415.9	1697.2	546	182.7	40.9002	2.98851	0.334615									65476.9	1363.6	558.4	154.6	48.0177	3.6119	0.276862
																59297.3	1149.8	416.5	188.9	51.5718	2.20487	0.453541									382647	5731.3	2007.6	300	66.7644	6.692	0.149432
																110463	1781.6	556.8	260.5	62.0022	2.13743	0.467852									31212.6	1657.4	670	69.1	18.8323	9.69609	0.103134
																77810.9	1515.1	596.7	174	51.3569	3.42931	0.291604									413540	4406	1837.2	307.8	93.8583	5.96881	0.167538
																382829	3175.5	1128.8	452.6	120.557	2.49403	0.400957									147987	2839	1336.8	155.6	52.1265	8.59126	0.116397
																94778.3	1608.3	595.9	208.5	58.9307	2.85803	0.349891									29189.9	846.4	264.1	171.7	34.4871	1.53815	0.650133
																209282	2990	1118	287.7	69.9939	3.88599	0.257335									134198	2573.4	909.2	212.5	52.1482	4.27859	0.233722
																92933	1853.3	628.9	199.6	50.1446	3.1508	0.31738									82844.8	1524.8	428.8	275.4	54.3316	1.55701	0.642257
																50699.5	1459.9	502.1	135.9	34.7281	3.69463	0.270663									40175.3	1665.7	679.1	107	24.1192	6.34673	0.157561
																22229.5	855	357.8	81.2	25.9994	4.4064	0.226942									131983	2534.1	911.5	200.5	52.0828	4.54613	0.219967
																42694.8	1316	417.3	147.5	32.4429	2.82915	0.353463									183149	2447.5	859.8	296.2	74.831	2.90277	0.344499
																43480.6	1241.3	409.9	148.1	35.0283	2.76772	0.361308									41168.9	1787.9	545.6	259.3	23.0264	2.10413	0.475257
																30710.7	1113.6	425.9	96.5	27.5779	4.41347	0.226579									123066	1708.8	540.3	303.4	72.0188	1.78082	0.56154
																152925	2302.5	687.6	313.6	66.4169	2.1926	0.456079									13535.4	875.8	312	103.5	15.4549	3.01449	0.331731
																298129	4345.4	1764.8	234.6	68.6079	7.52259	0.132933									223877	5131.6	1794.6	285.6	43.6271	6.28361	0.159144
																371565	6249.3	1222.6	588.7	59.457	2.07678	0.481515									769232	9316.9	3839.1	312.8	82.5631	12.2733	0.0814774
																234213	2475	886.3	352.6	94.6316	2.51361	0.397834									23745.3	989.7	318.3	122.5	23.9924	2.59837	0.384857
																8663.7	566.7	237.4	49.5	15.288	4.79596	0.208509									250694	5501.1	2254.1	536.9	45.5716	4.19836	0.238188
																172356	2783.4	1231.5	184.8	61.9228	6.66396	0.150061									20658	1050.8	481.4	59.7	19.6593	8.06365	0.124013
																707106	12402.6	4969.5	300.7	57.0127	16.5264	0.0605091									261244	2891	1150.7	313.1	90.3644	3.67518	0.272095
																27243.2	938.3	365.3	99.5	29.0346	3.67136	0.272379									196583	2696.9	1175.1	232.5	72.8922	5.05419	0.197856
																104471	1981.1	795.9	187.1	52.7339	4.25387	0.23508									35998.1	1456.8	512.8	109.8	24.7104	4.67031	0.214119
																315208	6447.6	2317.9	220.2	48.8876	10.5263	0.0949998									712576	6872.4	2613.9	373.2	103.687	7.00402	0.142775
																106854	3542.6	1464.1	166.3	30.1625	8.80397	0.113585									254704	3089.6	1117.4	319.4	82.4392	3.49843	0.285842
																64417.4	1821.1	642.5	166.9	35.3728	3.84961	0.259767									493272	6407.9	1952.5	749.7	76.9787	2.60438	0.383969
																185942	2301.8	668.9	389.2	80.7812	1.71865	0.581851									237863	6561	1793.3	760	36.2541	2.35961	0.4238
																43075.1	1012.5	416.8	135.4	42.5433	3.07829	0.324856									49442.3	1279.1	501.3	134.6	38.654	3.72437	0.268502
																129174	2201.1	642.9	272.5	58.6863	2.35927	0.423861									308582	4098.6	1598.8	279.5	75.2896	5.72021	0.174819
																171185	2430.2	851.2	270.2	70.4407	3.15026	0.317434									14812.9	773.7	224.6	119.5	19.1455	1.8795	0.532057
																45148.5	1504.5	602	166.6	30.009	3.61345	0.276744									63383.2	1287.1	551.5	151.5	49.245	3.64026	0.274705
																11157.8	480.7	176.8	81.8	23.2116	2.16137	0.46267									337914	4033	1746.7	273.9	83.7872	6.37714	0.15681
																15710.2	913.3	356.2	64.9	17.2016	5.48844	0.182201									225306	3209.1	1039.9	297.5	70.2086	3.49546	0.286085
																92010.4	2293	967.2	135.1	40.1266	7.15914	0.139682									607588	5422.3	2059.6	385.4	112.054	5.34406	0.187124
																43612.4	1613.4	699.7	98.3	27.0314	7.11801	0.140489									492912	6118.7	1423.1	1079.1	80.5583	1.31878	0.758274
																145103	3231.5	1403.7	210.2	44.9026	6.67793	0.149747									98752.7	2035	919.8	141.4	48.5271	6.50495	0.153729
																312602	6216.9	2628	181.6	50.2826	14.4714	0.069102									225382	3095.6	1257.5	268.6	72.8073	4.68168	0.213598
																7700.5	749.7	328.2	34.9	10.2714	9.40401	0.106338									39724.2	902.8	305.3	176	44.0011	1.73466	0.576482
																72067.2	1645.3	559.5	194.4	43.8019	2.87809	0.347453									142066	2117.5	775.2	256.5	67.0914	3.02222	0.330882
																10483.6	638.8	232.2	72.9	16.4114	3.18519	0.313953									438563	3602.9	1416.1	414.2	121.725	3.41888	0.292493
																19101.7	1305.7	334.6	140.9	14.6295	2.37473	0.4211									263140	3555.2	1491.6	235.2	74.0154	6.34184	0.157683
																186155	2797.3	1122.6	219.4	66.5481	5.11668	0.195439									292867	4156.3	1380.7	303.6	70.4633	4.54776	0.219888
																11274.4	771.1	349.3	45.5	14.6212	7.67692	0.130261									801038	7774.9	2828.8	405.1	103.029	6.98297	0.143206
																116917	2007.8	870	179	58.2312	4.86034	0.205747									150826	2033.1	730.7	276.4	74.1853	2.64363	0.378267
																260270	5091.7	1313.6	470.6	51.1166	2.79133	0.358252									151556	2311.6	933.1	220.3	65.5633	4.23559	0.236095
																115568	3345	1056.9	198.4	34.5495	5.32712	0.187719									167180	3101.1	1276.9	183.6	53.9099	6.95479	0.143786
																22209.2	895.5	387.9	78.2	24.8009	4.96036	0.201598									210306	2891.5	819.4	373.8	72.7324	2.19208	0.456187
																9535.6	598.2	255.4	52.2	15.9405	4.89272	0.204385
																38517.6	1425.2	557	108.9	27.0261	5.11478	0.195512													51.2015	4.69007	0.288395
																82206.1	2365.7	960.6	134.4	34.7492	7.14732	0.139913													30.0979	3.00342	0.152599
																125879	2520.9	824.4	232.8	49.9343	3.54124	0.282387
																90631.5	2239.1	607.6	242.1	40.4768	2.50971	0.398453
																10372.1	866.6	288	81	11.9687	3.55556	0.28125
																13307.3	776.1	338.7	54.5	17.1464	6.21468	0.160909
																78789.3	1980.6	815.3	136.8	39.7805	5.9598	0.167791
																13525.3	851.3	336.8	55.4	15.8878	6.07942	0.164489
																61710.3	1528.7	699.4	119.5	40.3678	5.85272	0.170861
																76366.1	1538.5	494.1	233.5	49.6367	2.11606	0.472576
																44423.5	1661.6	666.3	94.8	26.7354	7.02848	0.142278
																164098	2215.5	828.3	262.7	74.0681	3.15303	0.317156
																317550	4636.5	1673	291	68.4891	5.74914	0.173939
																101663	1545.1	507.6	267.6	65.7968	1.89686	0.527187
																14103.2	785.9	331.1	69.8	17.9453	4.74355	0.210812
																140378	2694.2	982.6	208.7	52.1037	4.70819	0.212396
																589019	8755.3	2169.6	601.8	67.2757	3.60518	0.277378
																286256	6758.6	947.5	523.8	42.3544	1.8089	0.552823
																66789.9	1958.2	898.7	113	34.1078	7.9531	0.125737
																83214.9	1949.8	558.7	216.1	42.6787	2.58538	0.386791
																208187	4702.2	1565.2	238.9	44.2743	6.5517	0.152632
																8055.3	660.2	312.8	38.2	12.2013	8.18848	0.122123
																131932	3425	1133.8	219.4	38.5204	5.16773	0.193509
																185719	4499.9	1215.4	331.7	41.2718	3.66415	0.272914
																12050.1	678.8	245.3	75.5	17.7521	3.24901	0.307786
																9368.3	505.7	163.6	80.1	18.5254	2.04245	0.489609
																15649.4	828.5	346.5	62.3	18.8888	5.5618	0.179798
																134168	3452.2	1325	146.3	38.8645	9.05673	0.110415
																55591.5	1748	548.4	167.2	31.8029	3.2799	0.304887
																97348.5	2356.1	718.7	199.6	41.3176	3.6007	0.277724
																105429	1857.1	610.8	243.7	56.7709	2.50636	0.398985
																107178	2512	847.3	204.5	42.6665	4.14328	0.241355
																94879.7	2401	1008.1	170	39.5167	5.93	0.168634
																278480	5333.1	1567.1	447.1	52.2172	3.50503	0.285304
																13717.9	593.7	169.5	111	23.1058	1.52703	0.654867
																347627	5534.4	1551.9	459.7	62.812	3.3759	0.296218
																10194.6	577.6	238.4	57.3	17.6499	4.16056	0.240352
																76056.8	1334.1	502.8	199.5	57.0098	2.5203	0.396778
																333387	5173.5	1498.8	328.1	64.4412	4.56812	0.218908
																49802.2	1447.2	589.8	119.1	34.4128	4.95214	0.201933
																137362	2590.9	1072.5	181.8	53.0169	5.89934	0.16951
																10554.6	535.9	234.4	59	19.6951	3.97288	0.251706
																56701.7	2556.8	1138.2	80.1	22.1768	14.2097	0.0703743
																27030.3	1114.5	427.8	120.1	24.2533	3.56203	0.280739
																12896.7	944	347.1	72.1	13.6618	4.81415	0.207721
																192654	3434.1	1136.5	237.1	56.1003	4.79334	0.208623
																19699.9	781.9	324.5	83.1	25.1949	3.90493	0.256086
																48012.7	1507.5	483.7	149.8	31.8492	3.22897	0.309696
																112334	1911.2	667.5	235.8	58.7766	2.83079	0.353258
																12541.8	1106.6	503	63.8	11.3336	7.88401	0.126839
																564680	9372.7	2791.1	1082	60.2473	2.57957	0.387661
																20282.8	821.3	319.5	87.2	24.696	3.66399	0.272926
																104446	2010	839.1	172.3	51.963	4.86999	0.205339
																51556.2	1479	641.8	104.7	34.8588	6.12989	0.163135
																114524	1884.7	694.5	223.5	60.765	3.10738	0.321814
																281187	4041.6	1616	287.7	69.5731	5.61696	0.178032
																104430	1863.5	635.7	221.7	56.04	2.86739	0.348749
																155708	3367	1144.6	203.2	46.2453	5.63287	0.177529
																85587.4	1517.4	556.6	205.3	56.404	2.71115	0.368847
																34031.2	888.7	305.3	154.5	38.2932	1.97605	0.50606
																257999	4032.4	950	527.2	63.9815	1.80197	0.554947
																150096	2813.6	1238.3	177.8	53.3466	6.96457	0.143584
																19699.9	1391.1	621.4	113.4	14.1614	5.47972	0.182491
																166095	3497.2	786.9	574.6	47.4938	1.36947	0.730207
																179970	2464.8	1069.1	222.2	73.0162	4.81143	0.207838
																17185.4	694.5	223.7	117	24.745	1.91197	0.523022
																541574	7420.9	3170	248.5	72.9795	12.7565	0.0783912
																127152	1980.9	744.9	231.4	64.1889	3.2191	0.310646
																120039	2632	1191.8	134	45.6076	8.89403	0.112435
																28911	1027.5	461.8	82.4	28.1372	5.60437	0.178432
																51292.6	1008.9	318	214.9	50.8401	1.47976	0.675786
																54187.3	1508.1	653.5	112.7	35.9308	5.79858	0.172456
																162080	3680.4	1143.7	349.2	44.0387	3.2752	0.305325
																67149.8	1582.4	654.6	135.9	42.4354	4.81678	0.207608
																38629.2	2150.6	1061	53.1	17.9621	19.9812	0.0500471
																464320	6601.3	2785.7	243.1	70.3377	11.4591	0.0872671
																27015.1	1046.4	456.8	78.3	25.8172	5.83397	0.17141
																58029.9	1550.2	663	118.8	37.4338	5.58081	0.179186
																1.10893e+06	10165.4	3691.2	566.6	109.089	6.51465	0.1535
																41229.8	1117.2	466.7	118.9	36.9046	3.92515	0.254768
																83138.9	1629.9	591.7	201.2	51.0086	2.94085	0.340037
																120708	2474.8	1200.6	134.1	48.7751	8.95302	0.111694
																188365	2792.9	1318.3	189.1	67.4443	6.97144	0.143442
																302382	3529.8	1479.4	277.8	85.6655	5.32541	0.187779
																57193.5	1342.1	580.5	131.4	42.6149	4.41781	0.226357
																20004	846.6	371.4	74.4	23.6286	4.99194	0.200323
																191660	3907.2	1249.7	246.1	49.0531	5.07802	0.196927
																2.63648e+06	33956.1	4693.2	2506.6	77.6438	1.87234	0.534092
																43100.4	1008.6	365.7	154.5	42.7329	2.36699	0.422477
																8258.1	472.7	187.3	57.4	17.4701	3.26307	0.30646
																10777.6	561.5	209.5	71.1	19.1943	2.94655	0.339379
																259966	5428.3	1489.1	293.5	47.8909	5.07359	0.197099
																185582	3052.8	1155.6	241.8	60.7908	4.77916	0.209242
																304663	5303.3	2342.7	181.5	57.4479	12.9074	0.0774747
																210007	2405.5	809	346.7	87.3027	2.33343	0.428554
																101419	2120.4	880.8	155.9	47.8303	5.64978	0.176998
																156737	3052.2	973.2	282.1	51.3521	3.44984	0.289868
																74069.6	1788.5	761.7	127.6	41.4144	5.96944	0.16752
																50268.6	1723.1	741.6	90.1	29.1734	8.23085	0.121494
																19953.3	884.8	407.7	65.1	22.5512	6.26267	0.159676
																214605	4712.1	1963.6	174	45.5433	11.2851	0.0886128
																78039	1527.4	638.7	160.8	51.0927	3.97201	0.251761
																1.43601e+06	15293	5687	956.6	93.8995	5.94501	0.168208
																74642.5	1949	838	126.8	38.2978	6.60883	0.151313
																9926	480.2	167.6	80.6	20.6706	2.0794	0.480907
																498752	5580.1	2113.4	335.4	89.3805	6.30113	0.158702
																1.11708e+06	15818.3	3010	1439	70.6196	2.09173	0.478073
																81136.4	1674.5	459.5	264.2	48.4541	1.73921	0.574973
																154557	2964.5	906.3	238.2	52.136	3.80479	0.262827
																325179	7431.2	933.3	716.1	43.7587	1.30331	0.767277
																81562.3	2136.5	660.4	198.7	38.1757	3.3236	0.300878
																559677	7644	2913.1	345.4	73.2178	8.43399	0.118568
																22964.6	1103.2	356	119.3	20.8164	2.98407	0.335112
																178439	2480.7	880.3	269.7	71.931	3.264	0.306373
																396212	4247.1	1682.3	314.1	93.2901	5.35594	0.186709
																84862.5	3180.7	864.1	314.4	26.6804	2.74841	0.363847
																795178	7283.8	1882.4	659.8	109.171	2.85299	0.35051
																359996	4648.6	1233.5	522.5	77.4419	2.36077	0.423591
																26736.2	1033.5	371.6	96.5	25.8696	3.85078	0.259688
																127182	2316.5	660	280.2	54.9027	2.35546	0.424545
																135405	2607.7	1013.7	187.7	51.925	5.40064	0.185163
																644509	8894.6	2511.7	1184.8	72.4607	2.11994	0.471712
																984694	11990.7	4587.2	315.8	82.1214	14.5256	0.0688437
																111938	2239.7	692.5	284.2	49.9792	2.43666	0.410397
																477024	5649.9	2547.4	267.5	84.4306	9.52299	0.105009
																171905	2854.5	1067.4	221.9	60.2224	4.81027	0.207888
																42973.7	1072.5	417	135.1	40.0687	3.0866	0.323981
																136926	2749.7	1148.1	171	49.7966	6.71404	0.148942
																59008.3	1613.6	557.8	155	36.5693	3.59871	0.277877
																210286	3465.9	1097.8	437.6	60.6727	2.50868	0.398615
																112917	2057.6	720	210	54.8779	3.42857	0.291667
																13246.5	596.1	256.3	69.2	22.2219	3.70376	0.269996
																715496	8197.2	2788	383.9	87.2854	7.26231	0.137697
																163794	3831.5	1082.5	464.3	42.7492	2.33147	0.428915
																554420	6160.9	1850.7	484.7	89.99	3.81824	0.261901
																169816	2512.7	1046	227.4	67.5832	4.59982	0.2174
																496582	7396.3	3358.2	226.2	67.1393	14.8462	0.0673575
																223466	3437.1	1207.4	368.9	65.0159	3.27297	0.305533
																9576.2	536.7	240.9	53.5	17.8427	4.5028	0.222084
																841979	11168.7	3424	533	75.3874	6.42402	0.155666
																17256.4	643.9	237.8	96.2	26.7998	2.47193	0.404542
																63788.8	1829.5	803.3	109.5	34.8668	7.33607	0.136313
																296258	3446.7	949.3	462.9	85.9542	2.05077	0.487622
																194459	2943.7	990.8	282.2	66.0593	3.51099	0.28482
																34097.1	1092.9	435.2	112	31.1987	3.88571	0.257353
																1.03473e+06	13707.7	5889.2	368.2	75.4856	15.9946	0.0625212
																1.04613e+06	15114.6	2804.4	1296.3	69.2129	2.16339	0.462238
																205333	3268.6	1021.6	316	62.8198	3.23291	0.309319
																62962.5	1177.1	411.4	197.7	53.4895	2.08093	0.480554
																45102.8	1386.4	438.1	142.2	32.5323	3.08087	0.324583
																854520	10928.7	3623.8	421.2	78.1905	8.60351	0.116232
																7715.7	597.2	230.7	48.1	12.9198	4.79626	0.208496
																445579	8063.8	1512.9	700.8	55.2567	2.15882	0.463216
																132799	4210	1200	371	31.5437	3.2345	0.309167
																64731.7	1271	482.9	179.5	50.9297	2.69025	0.371713
																28987.1	1030.1	378.2	114.3	28.1401	3.30884	0.302221
																80761.3	1460.9	559.5	198.7	55.2819	2.8158	0.355139
																172427	3028.5	1088.3	240.4	56.9348	4.52704	0.220895
																49660.3	1411	596.8	111.7	35.1951	5.34288	0.187165
																66871	1573.3	668.9	131.7	42.5037	5.07897	0.19689
																88365.5	1801	790.5	146.9	49.0647	5.38121	0.185832
																148687	4096	1330.5	310.9	36.3005	4.27951	0.233672
																39247.6	1112.5	445.9	116.5	35.2787	3.82747	0.261269
																128226	4314.1	1501.2	275.3	29.7227	5.45296	0.183387
																28165.8	1046.2	475.1	78.5	26.922	6.05223	0.165228
																35658.5	1091.5	455.8	102.5	32.6693	4.44683	0.224879
																57345.5	2346	942.8	104.9	24.4439	8.98761	0.111264
																93774.6	2759.5	748	262.9	33.9825	2.84519	0.351471
																36008.3	1205.9	463.6	111.1	29.8601	4.17282	0.239646
																19218.3	755.4	283.7	92.7	25.4412	3.06041	0.326754
																99244.5	2312.6	895.9	181.7	42.9147	4.93065	0.202813
																88781.2	3329.6	897.4	364.9	26.6642	2.4593	0.406619
																127096	2908.7	1171.6	185	43.6951	6.33297	0.157904
																10701.6	445.9	158.9	89.3	24	1.7794	0.561989
																98114	2401.4	886.2	158.7	40.857	5.58412	0.179079
																69451.4	1408	537.1	172.7	49.3263	3.11002	0.321542
																21545.1	910.6	390.6	73.5	23.6603	5.31429	0.188172
																61274.4	1815.2	460.9	213.9	33.7563	2.15475	0.464092
																132606	2264.8	765.7	233.9	58.5511	3.27362	0.305472
																106524	1798.4	724.9	195	59.2328	3.71744	0.269003
																69679.5	1650.7	576.7	192.7	42.2121	2.99273	0.334143
																3.2959e+06	31739.8	4861.6	2694.9	103.841	1.804	0.554324
																25849.1	1051.2	435.7	96	24.5901	4.53854	0.220335
																337199	4609.1	1830	254.1	73.1594	7.20189	0.138852
																13890.3	552.9	219.6	82.9	25.1226	2.64897	0.377505
																18184.1	2543.7	1275.8	127.5	7.14868	10.0063	0.0999373
																594270	10200.4	2303.4	633.9	58.2595	3.6337	0.275202
																37807.9	877.9	283.9	175.9	43.0663	1.61399	0.619584
																11634.4	504.8	156	102.1	23.0475	1.52791	0.654487
																229195	3289.8	1183.5	264.8	69.6682	4.46941	0.223743
																190236	4159.5	1145	398	45.7353	2.87688	0.347598
																275007	4240.2	866.2	536.1	64.8571	1.61574	0.61891
																294722	4727.1	1924.7	229.4	62.3474	8.39015	0.119187
																14625.3	827.6	294.3	74.1	17.6719	3.97166	0.251784
																566292	8175.1	1931.4	650.9	69.2704	2.96728	0.337009
																107614	1870.4	564.6	259.2	57.5353	2.17824	0.459086
																217748	3813.2	1535.6	252.1	57.1037	6.09123	0.16417
																66070	1255.4	519.7	167.7	52.6286	3.09899	0.322686
																131273	2303.2	755.2	269.8	56.996	2.79911	0.357256
																365882	5724.4	2226	245.6	63.9162	9.06352	0.110332
																17474.4	1106	533.9	51.3	15.7996	10.4074	0.0960854
																42213.2	913.5	314.1	174.1	46.2104	1.80414	0.554282
																125763	3129.9	827.8	487	40.1811	1.69979	0.588306
																14184.3	546.8	203	90.4	25.9406	2.24558	0.44532
																189384	4254.2	1533.4	245.3	44.517	6.25112	0.159971
																42198	977.7	254.9	223.7	43.1605	1.13947	0.877599
																85998	1560.4	586.3	194.7	55.1128	3.0113	0.332083
																20303.1	739.5	232.4	127.8	27.4552	1.81847	0.549914
																113363	2243.5	755.5	310.2	50.5295	2.43553	0.410589
																122163	3191.3	1168.6	177.3	38.2801	6.59109	0.15172
																7654.9	478.2	173.5	62.3	16.0077	2.78491	0.359078
																83306.2	1604.5	741.6	148.2	51.9203	5.00405	0.199838
																119994	2092.5	830.9	204.3	57.3447	4.06706	0.245878
																118792	1872	691.6	225.8	63.4574	3.06289	0.326489
																542593	5826.6	1955.2	427.3	93.1234	4.57571	0.218545
																86793.9	1982.9	418.4	320.6	43.7712	1.30505	0.766252
																87741.9	1631.9	515.8	237.2	53.7667	2.17454	0.459868
																125149	2190.2	829.4	213.2	57.1406	3.89024	0.257053
																53604.3	1214.6	450.5	162.2	44.1333	2.77744	0.360044
																769481	8722.6	1849.4	883.8	88.2169	2.09255	0.477885
																581156	6577.8	2135.5	415.4	88.3511	5.14083	0.194521
																12470.8	608.6	233.6	72.1	20.491	3.23994	0.308647
																728504	10069.6	2976.3	605.4	72.3469	4.91625	0.203407
																132247	2685.1	866.1	255.5	49.252	3.38982	0.295001
																144971	2040.1	775.7	246.8	71.0607	3.14303	0.318164
																155612	3006.7	1295.9	243.4	51.7549	5.32416	0.187823
																36930.9	1448	594.9	104.3	25.5048	5.70374	0.175324
																13124.8	672.8	184.1	107.2	19.5077	1.71735	0.582292
																221053	4224.8	1361.2	257.9	52.3227	5.27801	0.189465
																106220	1636.5	568.4	250.6	64.9068	2.26816	0.440887
																98347.2	2079.8	899.9	145	47.2869	6.20621	0.161129
																81770.1	1750.4	730	147.6	46.7151	4.9458	0.202192
																35846	1009	339.8	144	35.5263	2.35972	0.423779
																153062	2359.9	855.1	245.7	64.8594	3.48026	0.287335
																63631.6	1802.3	572.2	177.7	35.3058	3.22003	0.310556
																178556	3298.7	1121.4	266.2	54.1292	4.21262	0.237382
																113343	1912.1	783.3	193.4	59.2765	4.05016	0.246904
																284102	4411.4	1595.4	428.9	64.4017	3.71975	0.268835
																112678	2998.2	1192.2	155.8	37.582	7.65212	0.130683
																100613	1450.3	449.1	294.5	69.3741	1.52496	0.655756
																304572	5797.7	2475.8	411.9	52.5333	6.01068	0.16637
																324277	4628	1791.4	298.4	70.0685	6.00335	0.166574
																140895	2084.9	946.3	196.6	67.5788	4.81333	0.207757
																30026.3	1080.5	414.8	96.4	27.7893	4.3029	0.232401
																20607.3	966.9	464.1	62.9	21.3128	7.37838	0.135531
																271966	4457.5	1787.3	304.7	61.013	5.86577	0.170481
																84385.9	1996.4	752.5	152.9	42.269	4.92152	0.203189
																95305.5	1720.9	511	253	55.3812	2.01976	0.495108
																133489	2353.4	744.3	291.4	56.7216	2.55422	0.391509
																63707.7	1686.6	755.7	112	37.7729	6.74732	0.148207
[truncated: 121 more columns]

## Sheet: 300 degrees C
	Area	Perimetre	Lenght	Width	A/P	L/W	W/L	Area	Perimetre	Lenght	Width	A/P	L/W	W/L	Area	Perimetre	Lenght	Width	A/P	L/W	W/L	Area	Perimetre	Lenght	Width	A/P	L/W	W/L	Area	Perimetre	Lenght	Width	A/P	L/W	W/L	Area	Perimetre	Lenght	Width	A/P	L/W	W/L	Area	Perimetre	Lenght	Width	A/P	L/W	W/L
Graminoids
	Agropyron repens S&L	Agropyron repens S&L	Agropyron repens S&L	Agropyron repens S&L	Agropyron repens S&L	Agropyron repens S&L	Agropyron repens S&L	Agropyron repens S&L	Agropyron cristatum	Agropyron cristatum	Agropyron cristatum	Agropyron cristatum	Agropyron cristatum	Agropyron cristatum	Agropyron sp.	Agropyron sp.	Agropyron sp.	Agropyron sp.	Agropyron sp.	Agropyron sp.	Agropyron sp.	Agropyron cristatum I	Agropyron cristatum I	Agropyron cristatum I	Agropyron cristatum I	Agropyron cristatum I	Agropyron cristatum I	Agropyron cristatum I	Agropyron cristatum I	Agropyron cristatum I	Bromus sterilis	Bromus sterilis	Bromus sterilis	Bromus sterilis	Bromus sterilis	Festuca sp.	Festuca sp.	Festuca sp.	Festuca sp.	Festuca sp.	Festuca sp.	Festuca sp.	Agropyron repens-I	Agropyron repens-I	Agropyron repens-I	Agropyron repens-I	Agropyron repens-I	Agropyron repens-I	Agropyron repens-I
	85856.1	1571.3	599.1	200.7	54.6402	2.98505	0.335003	209916	2417.8	766.1	367.4	86.8209	2.08519	0.479572	10539.4	512.4	199.6	68.9	20.5687	2.89695	0.34519	892288	7455.7	2962.4	415.6	119.679	7.12801	0.140292	558120	5766.5	2116.7	410.5	96.7867	5.15639	0.193934	27081	1247.1	546.5	74.5	21.7152	7.33557	0.136322	12344.1	488.1	170.1	95	25.2901	1.79053	0.558495
	394884	3207	1219.2	438.7	123.132	2.77912	0.359826	256869	2934.1	1097.6	316.8	87.546	3.46465	0.28863	1.22368e+06	14552.2	2844.5	1270.8	84.0892	2.23835	0.446757	608313	5427.2	1579.2	601.5	112.086	2.62544	0.380889	29468.7	1411.4	644.4	66.7	20.8791	9.66117	0.103507	699857	6867.1	1466.3	817.9	101.914	1.79276	0.557799	342005	3337.9	998.1	462.2	102.461	2.15945	0.46308
	141382	3619	1624.9	119.5	39.0665	13.5975	0.073543	589216	4406.6	1672.1	478	133.712	3.49812	0.285868	294464	2724.6	934.6	414.6	108.076	2.25422	0.443612	39303.4	1264	496.8	109.8	31.0945	4.52459	0.221014	25271.2	729.6	237.5	143.2	34.6371	1.65852	0.602947	327638	3264.8	1349.5	326	100.355	4.13957	0.241571	112410	3578.6	648.7	341.6	31.4117	1.899	0.526592
	74652.6	1368.4	485.4	203.6	54.5547	2.38409	0.419448	72178.7	3147.9	1366	190.5	22.9292	7.1706	0.139458	397505	4507	2014.7	258.8	88.1973	7.78478	0.128456	31805.7	1053.8	392.9	127.4	30.1819	3.08399	0.324256	497758	5606.2	1549.7	639.8	88.7871	2.42216	0.412854	7928.6	668	237.7	61	11.8692	3.89672	0.256626	250035	3299	1037.1	360.9	75.7912	2.87365	0.34799
	181288	2506.1	1019.7	236.6	72.3388	4.30981	0.232029	52367.3	1217.4	383.2	197.4	43.0157	1.94124	0.515136	231314	5167.4	1226.7	843.7	44.764	1.45395	0.68778	192973	4031.9	1689.1	170	47.8617	9.93588	0.100645	41011.8	1858.1	827.2	69.8	22.0719	11.851	0.084381	318954	4360.5	1821.4	234.4	73.1462	7.77048	0.128692	104233	2392.1	615.2	321.4	43.5738	1.91413	0.522432
	7736	579.2	236	54.5	13.3564	4.33028	0.230932	57675.1	1202.1	414.1	183.6	47.9786	2.25545	0.443371	31957.8	954.9	355.9	117.3	33.4672	3.0341	0.329587	19192.9	638.6	234.9	106.7	30.0547	2.2015	0.454236	194956	3567.7	1280.2	243.8	54.6446	5.25103	0.190439	866621	9207.3	2788.1	1035.8	94.1233	2.69174	0.371507	76660.1	2058.4	889.3	169.9	37.2426	5.23426	0.191049
	11887.8	655	203.2	91.9	18.1493	2.2111	0.452264	9566	488.6	164.4	79	19.5784	2.08101	0.480535	2.47858e+06	11712.9	5126.5	649	211.611	7.89908	0.126597	376802	4191.3	1277.8	510.9	89.9009	2.50108	0.399828	66435	1432.5	519.5	174.8	46.377	2.97197	0.336477	213140	4226.8	1470.4	231.6	50.4258	6.34888	0.157508	97845.3	2072.2	554.6	253.9	47.2181	2.18432	0.457807
	238051	3347	1465.3	215.9	71.1237	6.78694	0.147342	311852	5045.9	1295.2	478.9	61.803	2.70453	0.36975	134817	4207.5	868.1	572	32.042	1.51766	0.65891	13185.6	662.8	195.1	96.3	19.8938	2.02596	0.493593	439440	5560.9	2154.3	285.1	79.0231	7.5563	0.13234	77146.8	1619.2	584.9	174	47.645	3.36149	0.297487	272184	4150.9	1031	433.3	65.5722	2.37941	0.420272
	13535.4	913.1	396.5	46.3	14.8236	8.56371	0.116772	595634	4771.2	1919.2	424.2	124.839	4.52428	0.22103	1.09737e+06	10459	4045.4	440.4	104.921	9.18574	0.108864	15492.2	515.5	177.6	113.2	30.0528	1.5689	0.637387	698372	6438.5	2209.9	490.2	108.468	4.50816	0.22182	232226	2973.6	810.8	408	78.0959	1.98725	0.503207	170790	2855.5	900.4	373.4	59.8107	2.41136	0.414705
	41032.1	1154.2	439.4	125.7	35.5503	3.49562	0.286072	54795.6	1083.4	336.3	214.5	50.5774	1.56783	0.637823	64579.6	1638	687.2	131.3	39.4259	5.23382	0.191065	167423	2981.8	989.7	398.5	56.1484	2.48356	0.402647	225104	3215.8	1335.4	235	69.9992	5.68255	0.175977	65411	1725.4	475.9	257.2	37.9106	1.85031	0.54045	462004	5019.7	1657.2	382.6	92.0381	4.33142	0.230871
	329514	5695.3	2100.5	224.4	57.8571	9.36052	0.106832	531252	4006.4	1585.9	441.5	132.601	3.59207	0.278391	7609.2	555.3	222.6	48.8	13.7029	4.56148	0.219227	130761	2253.2	855.5	207.8	58.0336	4.11694	0.242899	24510.8	1158.7	413.7	92	21.1537	4.49674	0.222383	14767.3	901.8	380.3	65	16.3754	5.85077	0.170918	630172	4852.8	1343	656.7	129.857	2.04507	0.48898
	155171	2247.8	821.5	255.7	69.0322	3.21275	0.31126	264154	2526.3	799.8	431.1	104.561	1.85525	0.53901	26695.7	1327.7	529.9	78	20.1067	6.79359	0.147198	188852	2373.5	886	313.9	79.5669	2.82255	0.354289	33356.9	1864	832	56.4	17.8953	14.7518	0.0677885	833087	6906.6	2193	521.8	120.622	4.20276	0.237939	293592	3411.3	1085.9	432.9	86.0645	2.50843	0.398655
	332571	6729.3	1656.4	279	49.4213	5.93692	0.168438	8780.3	483.9	179.3	66.1	18.1449	2.71256	0.368656	378469	5462.2	1130.8	543.2	69.2888	2.08174	0.480368	40484.6	1721	704.7	100.7	23.5239	6.99801	0.142898	27364.9	897.6	345.5	106.4	30.4867	3.24718	0.307959	485080	3248.6	921.3	700.6	149.32	1.31502	0.760447	276087	3424.1	740.9	630.8	80.6305	1.17454	0.851397
	383437	4073.5	1330.8	404.6	94.1297	3.28917	0.304028	62927	2178.1	1128.8	83.3	28.8908	13.551	0.0737952	48266.2	1558.7	614.6	117.8	30.9657	5.21732	0.191669	160311	2260.7	657	368.6	70.9121	1.78242	0.561035	116354	1876.9	742.9	209.3	61.9926	3.54945	0.281734	636981	5656.1	2025.1	427	112.618	4.74262	0.210854	9733.3	429.5	152.3	86.1	22.6619	1.76887	0.565332
	95128.1	1492.2	577	213.7	63.7502	2.70005	0.370364	327699	3024.8	963.7	446	108.337	2.16076	0.4628	19157.4	821.3	300.9	87.9	23.3257	3.42321	0.292124	947403	10680.2	3393	598	88.7065	5.67391	0.176245	161472	2445.8	1006.1	212.1	66.0201	4.74352	0.210814	1.04899e+06	15410.4	3224.7	895.4	68.0705	3.60141	0.277669	157680	5204.6	2446.1	177.6	30.2963	13.7731	0.0726054
	57041.4	1385	557.1	137.7	41.1851	4.04575	0.247173	276746	3090.4	1014.5	377.8	89.5502	2.68528	0.3724	159698	3523.4	1223.5	230.9	45.3249	5.29883	0.188721	469096	6810.7	2450.1	354.6	68.8763	6.90948	0.144729	211543	2837.2	1141.5	273.3	74.5604	4.17673	0.239422	8090.8	561	193.3	60.3	14.4221	3.20564	0.31195	127755	2328	597.7	342.1	54.8776	1.74715	0.572361
	50050.6	1137.3	400.1	182.9	44.0083	2.18753	0.457136	629782	4461	1577.1	537.3	141.175	2.93523	0.340689	252215	5434.8	1427.8	338.3	46.4074	4.22051	0.236938	254851	2429.5	681.2	533.5	104.899	1.27685	0.783177	19238.5	920.4	436	62.8	20.9023	6.94268	0.144037	328941	5751.2	1014.4	501.1	57.1952	2.02435	0.493987	219395	3279.6	1417.6	225.7	66.897	6.2809	0.159213
	401551	4452.2	1489.3	534.3	90.1915	2.78739	0.358759	13773.7	581.8	225.5	82.8	23.6743	2.72343	0.367184	50785.7	2681.1	835.2	215.9	18.9421	3.86846	0.258501	213054	3727.8	1367.1	259	57.1526	5.27838	0.189452	15978.9	653.5	246.2	86.6	24.4513	2.84296	0.351747	12364.4	544.8	211.3	77.9	22.6953	2.71245	0.36867	1.11093e+06	7911.6	2142.4	684.4	140.418	3.13033	0.319455
	457933	3213.7	1072.8	560.5	142.494	1.91401	0.522465	10564.7	1027.5	447	37.1	10.2819	12.0485	0.0829978	27202.6	1463.8	566.6	67.4	18.5835	8.40653	0.118955	367884	4181.3	1433.7	340.9	87.9833	4.20563	0.237776	29220.3	855.3	282	140.8	34.1638	2.00284	0.499291	18442.6	735.4	246.1	103.9	25.0783	2.36862	0.422186	76558.7	1357	388.5	265.4	56.4176	1.46383	0.68314
	396010	3267.1	1184.2	439.9	121.211	2.69198	0.371474	350126	4335.9	1672.9	337.3	80.7505	4.95968	0.201626	59449.4	1716.8	603.9	166.2	34.628	3.63357	0.275211	17433.8	736.2	273.7	88.6	23.6808	3.08916	0.323712	23689.5	942.2	375.5	91.4	25.1428	4.10832	0.243409	12247.8	642.1	245.5	71	19.0746	3.45775	0.289206	117880	1839.8	728.8	229.1	64.0721	3.18114	0.314352
	805616	8142.9	1797.9	999.1	98.9347	1.79952	0.555704	485115	4111.9	1647.5	394	117.978	4.18147	0.23915	139136	1875.1	628.2	294.1	74.2019	2.13601	0.468163	14660.8	971.4	364.9	75.1	15.0924	4.85885	0.20581	266252	3197.8	1148.3	318	83.2611	3.61101	0.276931	633194	5945.5	2195.4	385.4	106.5	5.69642	0.175549	139562	2465.7	567.6	328.4	56.6013	1.72838	0.578576
	159895	2364.9	824.1	290.7	67.6119	2.83488	0.352748	10088.2	793	161.7	103.9	12.7216	1.5563	0.642548	255003	4710.5	1098.5	388.9	54.135	2.82463	0.354028	92334.8	2565.1	1161.3	121.8	35.9966	9.53448	0.104882	23213	899.8	323.1	95.6	25.798	3.37971	0.295884	365649	3866.8	1336.6	376	94.5611	3.55479	0.281311	56047.8	1755.7	586.4	143.7	31.9233	4.08072	0.245055
	263981	3276.6	1034.6	358.1	80.5656	2.88914	0.346124	443029	4799	1717.4	361.2	92.3169	4.75471	0.210318	100071	2017.1	723.9	189.6	49.6112	3.81804	0.261915	84142.6	1379.5	511.2	213.9	60.995	2.3899	0.418427	915972	12794.6	3325.2	1987.4	71.5905	1.67314	0.597678	336302	4106.5	1320.8	349	81.895	3.78453	0.264234	442669	3988.1	1357.1	422.4	110.997	3.21283	0.311252
	1204459	10838.1	3229.7	1717	111.132	1.88101	0.531628	300238	5886	1517.3	468.3	51.0088	3.24002	0.30864	29316.6	965.4	347	113.9	30.3673	3.04653	0.328242	341184	5364.7	2284.7	224.8	63.5979	10.1633	0.0983937	50770.5	1608.7	561	155.1	31.56	3.61702	0.276471	47804.8	1191	466.6	136.9	40.1384	3.40833	0.293399	14513.8	515.2	153.8	126.9	28.1712	1.21198	0.825098
	120095	1584.6	531.5	303.3	75.7889	1.75239	0.570649	648154	4335.3	1641.6	526.7	149.506	3.11676	0.320846	237311	4047.6	1207.3	408.7	58.63	2.954	0.338524	158816	2744.1	1183.7	183	57.8753	6.46831	0.1546	8273.3	468.9	187.1	57.7	17.6441	3.24263	0.308391	160179	2122.7	671.8	317.6	75.4601	2.11524	0.47276	94580.6	2429.3	1053	119	38.9333	8.84874	0.11301
	67748	1808	613.1	177.9	37.4712	3.44632	0.290165	218934	4099.6	1162.2	448.9	53.4037	2.589	0.38625	10311.2	531.9	164.8	94.5	19.3856	1.74392	0.573422	12658.4	534.8	166.6	104	23.6694	1.60192	0.62425	1.04952e+06	6335	2479.1	562.8	165.67	4.40494	0.227018	29955.3	912.7	304	160.3	32.8205	1.89644	0.527303	480213	4216.5	1022.9	668.6	113.889	1.52991	0.653632
	266120	2754.7	1018.6	351.2	96.6059	2.90034	0.344787	1.04478e+06	8749.7	2661.4	616.2	119.407	4.31905	0.231532	9079.4	602.5	225.6	67.9	15.0695	3.32253	0.300975	388583	4072.1	1261	516.1	95.4257	2.44332	0.409278	1025234	11894.4	4584.2	559.1	86.1947	8.19925	0.121962	288360	3791.2	1043.7	415.4	76.0604	2.51252	0.398007	342948	3754	916.9	504	91.3553	1.81925	0.549678
	97556.4	1857	786.2	163.8	52.5344	4.79976	0.208344	145447	2647	880.2	334.7	54.948	2.62982	0.380254	1.05031e+06	10019	2938.2	595.4	104.832	4.93483	0.202641	43825.3	1209.7	352	199.6	36.2282	1.76353	0.567045	25337.1	765	264	125.7	33.1204	2.10024	0.476136	659332	6610.3	1532.9	694.6	99.7431	2.20688	0.453128	127801	1519.9	478.4	349.1	84.0849	1.37038	0.729724
	111457	1645.8	606.2	249.1	67.722	2.43356	0.41092	285587	4792	1118.2	658	59.5966	1.69939	0.588446	198560	2862	931.2	287.4	69.378	3.24008	0.308634	261801	4920.9	1345.1	371.8	53.2019	3.61781	0.276411	594737	5272.8	1496	567.2	112.793	2.63752	0.379144	678170	8799.8	2961.5	727.6	77.0665	4.07023	0.245686	69142.1	1195.3	427.8	213.8	57.845	2.00094	0.499766
	8623.1	465.8	195	58	18.5125	3.36207	0.297436	14082.9	629.9	240.1	77.9	22.3574	3.08216	0.324448	7629.5	453.7	174.2	59	16.8162	2.95254	0.338691	16708.9	596.4	207.3	106.1	28.0163	1.95382	0.511819	8232.8	486.3	200.7	54.1	16.9295	3.7098	0.269557	367930	7111.2	2110.8	304.9	51.7395	6.92293	0.144448	13854.8	539.1	208.4	88.6	25.6999	2.35214	0.425144
	174673	2660.8	1059.6	233.1	65.6467	4.54569	0.219989	17869.8	895.1	306.7	92.5	19.964	3.31568	0.301598	31729.6	1397.4	638.5	71.7	22.7062	8.90516	0.112294	28373.7	754.9	246.2	158.7	37.586	1.55135	0.644598	75590.5	1789.4	765.2	131.8	42.2435	5.80577	0.172243	986554	9663.3	2331.2	836.9	102.093	2.78552	0.359	56620.6	1634.5	366.9	230.2	34.6409	1.59383	0.627419
	315061	3120.6	1234.7	338	100.962	3.65296	0.273751	371661	3660.6	1065	471.1	101.53	2.26067	0.442347	141057	3476.9	1137.1	203.7	40.5698	5.58223	0.17914	106676	1601	547.9	274	66.631	1.99964	0.500091	114443	2076.1	871.8	177.7	55.1239	4.90602	0.203831	62845.9	1290.4	448.6	195.5	48.7027	2.29463	0.4358	285982	2750.1	1007.7	389.6	103.99	2.5865	0.386623
	291752	3804.6	998.2	456.9	76.6839	2.18472	0.457724	284340	3733.4	1039.6	431.2	76.1611	2.41095	0.414775	8536.9	444.3	179	67	19.2143	2.67164	0.374302	15882.6	574.7	208.4	101	27.6363	2.06337	0.484645	219664	4449.6	1651.1	515.4	49.3671	3.20353	0.312156	100025	2513.2	480.8	315.2	39.7999	1.52538	0.655574	430806	3201.8	1019.6	567.4	134.551	1.79697	0.556493
	120191	1761	687.6	229.9	68.2518	2.99087	0.334351	115036	2223.9	916.1	167.5	51.7271	5.46925	0.18284	21413.3	1006	244	138.4	21.2856	1.76301	0.567213	92405.8	2095.2	812.5	167.5	44.1036	4.85075	0.206154	12141.3	714.9	309.2	54.6	16.9832	5.663	0.176585	40509.9	887.4	274.1	198.6	45.6501	1.38016	0.724553	121880	2520.6	801.6	207.6	48.3534	3.86127	0.258982
	81136.4	1541.6	574.1	187.4	52.6313	3.0635	0.326424	472832	4414.3	1450.1	475.1	107.114	3.0522	0.327633	30016.2	1242	390.5	142.4	24.1676	2.74228	0.364661	18042.1	578.2	202.3	115.6	31.2039	1.75	0.571429	18554.2	823.7	358.8	69	22.5254	5.2	0.192308	9647.1	474.1	172.8	75.1	20.3482	2.30093	0.434606	192350	3445.5	642.5	506.1	55.8264	1.26951	0.787704
	406422	3316	1155.8	471.3	122.564	2.45237	0.40777	405926	6238.6	2541	299.5	65.0668	8.48414	0.117867	163003	4339.4	1694	169.1	37.5635	10.0177	0.0998229	130442	2335.6	785.1	222.9	55.8494	3.52221	0.283913	584360	5916.3	1930.3	464.3	98.7711	4.15744	0.240533	853349	10683.6	2610.9	1548	79.8747	1.68663	0.592899	372021	2792.8	869.3	571.9	133.207	1.52002	0.657886
	338152	4765.4	1446.9	539.1	70.9599	2.68392	0.37259	257300	2563.2	700.4	494.3	100.382	1.41695	0.70574	62298.4	1788.2	669.4	134.3	34.8386	4.98436	0.200627	517788	11853.3	3500.1	1229.4	43.683	2.847	0.351247	43435	1077.3	378.9	157.1	40.3184	2.41184	0.414621	82925.9	2477.9	609.8	214.8	33.4662	2.83892	0.352247	271555	2619.9	854.2	425.5	103.651	2.00752	0.498127
	158511	3151.4	979	348.5	50.2987	2.80918	0.355975	38679.8	1112.8	461.3	112.4	34.759	4.10409	0.243659	57999.5	4120.4	648.2	213.6	14.0762	3.03464	0.329528	124683	2042.8	763.4	249.3	61.0353	3.06217	0.326565	84766.2	1586.3	565.6	199.7	53.4364	2.83225	0.353076	97510.7	2531	588.8	313.6	38.5266	1.87755	0.532609	93622.5	1675.9	648.4	192.3	55.864	3.37181	0.296576
	862089	6429	1944.1	648.7	134.094	2.99692	0.333676	13966.3	596.8	200.3	94	23.402	2.13085	0.469296	39800.2	1165.3	495.5	107.8	34.1545	4.59647	0.217558	95498.2	5458.2	1938.3	301.3	17.4963	6.43312	0.155445	302600	3436.6	1266.9	320	88.0522	3.95906	0.252585	122483	1980.8	583.5	295	61.835	1.97797	0.50557	234578	2422.7	611.6	555.2	96.8252	1.10159	0.907783
	357016	5016.2	1415.3	560.4	71.1725	2.52552	0.395958	131283	3030.3	1309.4	181.5	43.3236	7.21433	0.138613	85856.1	2223.9	1070.4	121.5	38.6061	8.80988	0.113509	45543.9	1017.6	309.1	194.1	44.7562	1.59248	0.627952	157421	3283.4	857.7	371	47.9446	2.31186	0.432552	33473.5	961.7	374.3	117.4	34.8066	3.18825	0.313652	853395	7423.4	2172.8	623	114.96	3.48764	0.286727
	353959	3884.8	1417.8	334.8	91.1137	4.23477	0.23614	71540	1312.8	423.6	231.5	54.4942	1.82981	0.546506	12399.9	726.1	299	59.7	17.0774	5.00838	0.199666	15269.2	810.9	383.1	53.2	18.8299	7.20113	0.138867	366891	2910.1	902.6	540.9	126.075	1.6687	0.599269	124658	3060.1	758.5	239.4	40.7364	3.16834	0.315623	282054	2875.1	912	419.2	98.1022	2.17557	0.459649
	55241.7	1212.8	487	152.2	45.5489	3.19974	0.312526	504653	7644.7	2054.8	798.3	66.0134	2.57397	0.388505	140469	1951.4	719.8	258.1	71.9838	2.78884	0.358572	11345.4	792.7	340.6	48.6	14.3124	7.00823	0.142689	54673.9	1492.3	592.1	121.4	36.6373	4.87727	0.205033	8922.2	601.3	223.9	65.4	14.8382	3.42355	0.292095	247024	2551.7	908	354.3	96.8075	2.5628	0.390198
	40484.6	1483.7	599.4	91.1	27.2862	6.57958	0.151985	37843.4	1063.2	432.7	121.3	35.5939	3.56719	0.280333	58694	1331.5	475.7	166.5	44.0811	2.85706	0.350011	86023.4	2588.5	907.4	254	33.2329	3.57244	0.279921	7898.2	499.5	190.7	56.1	15.8122	3.39929	0.294179	317494	3467.8	1373	318.2	91.5549	4.3149	0.231755	118691	1658.6	513.1	312.5	71.5609	1.64192	0.609043
	224921	2891.7	1278.1	232.7	77.7816	5.49248	0.182067	197059	3014.4	1303.4	198.9	65.3727	6.55304	0.152601	356950	3477.4	1021.8	471.5	102.648	2.16713	0.461441	89217.1	2604.9	1088.5	150.4	34.2497	7.23737	0.138172	156296	3474.7	1578.3	133.5	44.9811	11.8225	0.0845847	236368	2850.2	1101.6	282.2	82.9303	3.90361	0.256173	197247	2508.1	837.2	304.6	78.644	2.74852	0.363832
	27157	1002.9	389.4	104.1	27.0785	3.74063	0.267334	118539	3157	774.3	325.2	37.5479	2.381	0.419992	51525.8	1638.3	477.4	188.1	31.4508	2.53801	0.394009	12998.1	695.5	271.6	70.6	18.6889	3.84703	0.259941	164554	3897.1	1844.8	117.3	42.2248	15.7272	0.0635841	19978.7	692.1	285	91.6	28.8668	3.11135	0.321404	45442.5	1651.1	604.4	107.6	27.5226	5.6171	0.178028
	289318	5544.7	2541.6	157	52.1792	16.1885	0.0617721	1.11531e+06	13288.2	3602.1	949.2	83.9322	3.79488	0.263513	128860	2094.5	763.4	240.6	61.5231	3.1729	0.315169	10661	548.8	206.6	69.8	19.426	2.95989	0.337851	10098.3	523.1	202.3	66.5	19.3047	3.04211	0.32872	42375.5	1063.5	408.8	134.2	39.8453	3.0462	0.328278	306615	6010.7	1324.7	457.7	51.0115	2.89425	0.345512
	224586	3616.9	1492.7	200.9	62.0936	7.43006	0.134588	540109	8582.8	2836.7	410.5	62.9292	6.91035	0.14471	9332.8	464	185.1	66.8	20.1138	2.77096	0.360886	94347.4	2113.2	958	133.9	44.6467	7.15459	0.13977	383873	3110.7	1029.8	490.6	123.404	2.09906	0.476403	8197.3	574.3	206.6	55.8	14.2736	3.70251	0.270087	255338	3957.6	1613.7	281	64.5183	5.7427	0.174134
	259829	4741	1811	349.8	54.8047	5.17724	0.193153	8673.8	546.2	226.3	52.1	15.8803	4.34357	0.230225	19552.8	914.6	361.7	82.5	21.3785	4.38424	0.22809	42527.6	1679.4	735.9	80.3	25.3231	9.16438	0.109118	237752	2927.9	1066.8	298.3	81.2022	3.57627	0.279621	155024	2354.7	886	230.7	65.8358	3.84049	0.260384	252311	4317.8	1269.6	275.3	58.4351	4.6117	0.21684
	245904	4583.9	1928.4	190.2	53.645	10.1388	0.098631	548924	6109.5	1522.3	556.7	89.8477	2.73451	0.365697	94874.6	1688.9	714.6	177.3	56.1754	4.03046	0.248111	215603	3002.3	928.9	345.6	71.8127	2.68779	0.372053	225737	5099.4	1929.6	216.2	44.2674	8.92507	0.112044	65755.7	1648	536.2	177.6	39.9003	3.01914	0.33122	20282.8	753.8	235.5	118.4	26.9074	1.98902	0.50276
	39810.3	1610.8	662.2	85.7	24.7146	7.72695	0.129417	523826	4627.7	1510.8	473.2	113.193	3.19273	0.313212	194018	2534.5	933.4	272.4	76.5507	3.42658	0.291836	179585	4165.5	1065.8	392.3	43.1125	2.7168	0.36808	64493.5	2367.9	979	91.6	27.2366	10.6878	0.0935649	178059	3504.6	1492.9	176.5	50.8073	8.45836	0.118226	271727	5300.6	1765.3	310.1	51.2635	5.69268	0.175664
	8557.2	570.1	248.6	52.9	15.01	4.69943	0.212792	10934.8	661.7	273.9	52.9	16.5253	5.17769	0.193136	79808.2	1727.6	668.3	156.7	46.196	4.26484	0.234476	27222.9	1427.9	503.9	75.9	19.065	6.639	0.150625	26822.4	1667.8	787	98.1	16.0825	8.02243	0.124651	8552.1	901.4	161.4	125.5	9.48757	1.28606	0.777571	49259.8	1237	455.3	145.8	39.822	3.12277	0.320228
	107589	4781.5	2237.3	101.3	22.5011	22.0859	0.0452778	416110	4374.5	1352.6	418.3	95.1217	3.23356	0.309256	1.27963e+06	14389.6	4790.8	436.9	88.9273	10.9654	0.0911956	33012.2	1012	299.7	163.8	32.6208	1.82967	0.546547	147663	3163	1343.5	157.9	46.6844	8.50855	0.117529	211472	3573	1407.3	199.8	59.1861	7.04354	0.141974	316272	3551	1407.9	313.2	89.0657	4.49521	0.222459
	23233.3	871.9	291.5	112.9	26.6467	2.58193	0.387307	197146	3303	1313.4	231.5	59.6868	5.67343	0.17626	155323	2228.8	825.5	255.2	69.6889	3.23472	0.309146	16343.9	635.8	213.3	101.3	25.706	2.10563	0.474918	12541.8	747	332.9	51.5	16.7896	6.46408	0.154701	347069	4909	1418.5	482.9	70.7006	2.93746	0.34043	124627	2157.9	996.2	165.4	57.7539	6.02297	0.166031
	8111.1	556.6	240.1	49.3	14.5726	4.87018	0.205331	459910	4924.6	1216.2	571.3	93.3903	2.12883	0.469742	16490.9	1022.6	416.7	67.6	16.1264	6.1642	0.162227	11294.7	590.9	217.5	73.6	19.1144	2.95516	0.338391	114443	2864	1251.8	132.2	39.959	9.46899	0.105608	556174	6215.6	2202.7	454.4	89.4803	4.84749	0.206292	12399.9	682.7	282	60.1	18.163	4.69218	0.213121
	85146.4	5166.9	2265.6	117.3	16.4792	19.3146	0.0517744	23988.6	816.4	339.6	94.9	29.3834	3.5785	0.279446	25149.5	771.7	204	166.8	32.5897	1.22302	0.817647	106970	1621.6	524.1	274.6	65.9659	1.90859	0.523946	96801	1641.1	633.4	205.1	58.9854	3.08825	0.323808	476401	4524.7	1123.4	607.1	105.289	1.85044	0.540413	27304	871.1	262.7	143	31.3443	1.83706	0.544347
	555444	10328.5	2260.2	1287	53.7778	1.75618	0.569419	409449	4485.6	1004.4	583.4	91.2807	1.72163	0.580844	21266.3	909.1	363.3	83.9	23.3927	4.33015	0.230939	16911.7	637.7	178.9	133.1	26.5198	1.3441	0.743991	105267	3396.7	671.3	560.9	30.991	1.19683	0.835543	34822	1159.2	375.2	129.4	30.0397	2.89954	0.344883	9479.9	481.5	158	83.4	19.6883	1.89448	0.527848
	9510.3	486.9	156.3	84.4	19.5323	1.8519	0.539987	381800	5954.2	1831.7	671.5	64.1228	2.72777	0.366599	203847	3698.9	1086.5	358.9	55.1103	3.02731	0.330327	185562	3415.8	1100.9	338.6	54.3246	3.25133	0.307567	10164.2	477	173.6	79.6	21.3086	2.1809	0.458525	103924	1696.5	480.1	285.2	61.2576	1.68338	0.594043	121383	2166	742.8	240.1	56.04	3.09371	0.323236
	75458.7	3898	1934.9	58.9	19.3583	32.8506	0.0304408	11583.7	648.8	194.1	98.1	17.854	1.97859	0.50541	224510	2933.1	1272.3	234.8	76.5437	5.41865	0.184548	49153.3	1858.3	712.2	118	26.4507	6.03559	0.165684	83950	1918	762	164.6	43.7696	4.6294	0.21601	280786	3104.8	813.6	640.5	90.4362	1.27026	0.787242	22239.6	701.8	235	131.7	31.6894	1.78436	0.560426
	565709	4834.2	1908.2	388.9	117.022	4.90666	0.203805	17048.5	575.3	194.4	116.2	29.6341	1.67298	0.597737	512414	5216	1857.7	370.8	98.2389	5.00998	0.199602	47972.1	1360	544.7	127.4	35.2736	4.27551	0.23389	8876.6	494.5	199.4	68.5	17.9507	2.91095	0.343531	564852	5930.6	1915.6	448.6	95.2437	4.27017	0.234183	154831	2981.4	1123.5	201.6	51.9323	5.57292	0.179439
	28241.9	976.6	347.9	127.6	28.9186	2.72649	0.366772	188031	2105.7	717.9	354.9	89.2961	2.02282	0.494359	9738.4	545.7	184.2	75.4	17.8457	2.44297	0.409338	8298.7	537.5	239.7	48.5	15.4394	4.94227	0.202336	16065.1	536.8	160.2	133.4	29.9275	1.2009	0.832709	23268.7	1274.4	372.7	93.5	18.2586	3.9861	0.250872	445198	4990.8	1246.1	533.7	89.2038	2.33483	0.428296
	7659.9	549.2	233.2	46.4	13.9474	5.02586	0.198971	697216	7803.2	1692.3	879.2	89.35	1.92482	0.51953	7710.6	660.2	153.3	100.4	11.6792	1.52689	0.654925	10732	546.1	162.7	95.9	19.6521	1.69656	0.589428	48261.1	1005.9	322.8	210.2	47.978	1.53568	0.651177	9317.6	791.8	194.4	90.1	11.7676	2.1576	0.463477	175910	2138.8	851.1	282.5	82.2469	3.01274	0.331923
	12151.5	647.7	252.2	68.8	18.761	3.6657	0.272799	9064.2	699.2	253.1	77	12.9637	3.28701	0.304228	66353.9	2551.6	922.5	163.8	26.0048	5.63187	0.177561	23319.4	1051.4	380.4	93.3	22.1794	4.07717	0.245268	143577	3250.7	1210.9	362.7	44.168	3.33857	0.299529	426584	7038.5	2663	581.5	60.6072	4.57954	0.218363	33098.4	1783.1	730	94.6	18.5623	7.7167	0.129589
	15355.3	843.3	376.8	55.2	18.2086	6.82609	0.146497	163809	3317.3	1067.7	243.9	49.3802	4.37761	0.228435	28165.8	719	248.1	148.7	39.1736	1.66846	0.599355	16855.9	647.9	166.5	151.4	26.0162	1.09974	0.909309	143450	1810.3	570.2	335.3	79.241	1.70057	0.588039	338522	7051	1171.5	454.1	48.0105	2.57983	0.387623	24221.8	990.6	296.4	117.1	24.4516	2.53117	0.395074
	101769	2762.8	1028.5	359.5	36.8355	2.86092	0.349538	12318.7	672	233.3	78.4	18.3314	2.97577	0.336048	855230	7536.2	1704	810.1	113.483	2.10344	0.475411	159044	2288.5	843.8	267	69.4969	3.1603	0.316426	75996	1452	481.2	220.7	52.3388	2.18034	0.458645	75935.2	1444.2	587.1	167.9	52.5794	3.49672	0.285982	108592	1729	600.8	250.3	62.8065	2.40032	0.416611
	483143	4961.9	1780.6	374.5	97.3706	4.75461	0.210322	15254	652.6	245.1	83.4	23.3742	2.93885	0.340269	211994	2828.1	701.6	438.6	74.9599	1.59964	0.625143	10600.2	498.8	166.3	88	21.2514	1.88977	0.529164	356645	4237.1	1616.2	302.4	84.1721	5.34458	0.187106	560533	6711.1	1136.6	1028.3	83.5233	1.10532	0.904716	54288.7	1485.9	383.5	204.2	36.5359	1.87806	0.532464
	71905	1401.3	522.4	180.2	51.3131	2.899	0.344946	62612.7	1570.9	621.7	144.6	39.8579	4.29945	0.232588	201596	2827.7	689.6	418.3	71.2935	1.64858	0.606584	244454	3635.8	1128.9	327.5	67.2352	3.44702	0.290105	396501	6120.2	2485.2	219	64.7857	11.3479	0.0881217	103249	2503.2	1062.4	130.6	41.2469	8.13476	0.122929	65243.7	1430.7	507.1	190.4	45.6026	2.66334	0.375468
	225266	2240.7	729.3	410.3	100.534	1.77748	0.562594	349873	3649.1	1332.4	355.7	95.8792	3.74585	0.266962	153842	3911.4	1342.8	162.5	39.3318	8.26338	0.121016	53173.4	1190.8	434	164.9	44.6535	2.6319	0.379954	13778.7	530.3	174.7	106.3	25.9828	1.64346	0.608472	63297.1	1111.1	319.1	260	56.968	1.22731	0.814792	16825.5	550.1	185.1	122.7	30.5863	1.50856	0.662885
	12491.1	1289.8	386.4	67	9.68452	5.76716	0.173395	89156.3	2496.4	901.8	204.5	35.7139	4.40978	0.226769	227390	3848.5	923.9	456.5	59.0853	2.02388	0.494101	85957.5	1932.3	684.6	176.2	44.4846	3.88536	0.257377	182824	4089.1	1217	235.2	44.7102	5.17432	0.193262	12967.6	1021.8	283.9	97.6	12.6909	2.90881	0.343783	227506	2764.1	953.5	342.3	82.3076	2.78557	0.358993
	68564.2	3316	1328.5	74.5	20.6768	17.8322	0.0560783	36550.7	1201.9	391.8	141.5	30.4108	2.7689	0.361154	570216	11126.7	2998	776.8	51.2475	3.85942	0.259106	146644	2652.7	1086.5	195.2	55.281	5.56609	0.179659	54390.1	1740.3	426.1	221	31.2533	1.92805	0.518658	188203	6590.1	1458.5	509.3	28.5585	2.86373	0.349194	26259.7	782.9	263.3	141.4	33.5416	1.86209	0.53703
	80026.2	1375.3	491.7	218.4	58.1882	2.25137	0.444173	657466	10000.1	1931.9	1369.6	65.746	1.41056	0.708939	373415	5428	1482.7	343.6	68.7943	4.31519	0.231739	762049	9028.9	3328.7	460.2	84.4011	7.23316	0.138252	43936.9	1783.1	828.8	72.3	24.6407	11.4633	0.0872346	587589	5852.6	1894.2	461.7	100.398	4.10266	0.243744	37726.8	1150.2	313	173.4	32.8002	1.80507	0.553994
	110706	2119.1	626.5	248.9	52.2422	2.51708	0.397287	28028.9	1222.6	364.5	114.9	22.9257	3.17232	0.315226	13910.6	507.9	170.8	106.1	27.3885	1.6098	0.621194	214265	2802.4	827.1	381.6	76.4577	2.16745	0.461371	363656	4850.4	2056.1	239.9	74.9745	8.57065	0.116677	35714.2	1493.2	584.8	89.7	23.9179	6.51951	0.153386	22437.4	728.3	247.2	119.3	30.8079	2.07209	0.482605
	62612.7	1667.9	631.6	139.7	37.5398	4.52112	0.221184	32860.1	918.4	299.9	161.2	35.7797	1.86042	0.537513	22173.7	944.5	444.7	65.4	23.4767	6.79969	0.147065	71681.9	1246.5	377.1	253.6	57.5065	1.48699	0.672501	23618.5	984.8	402	84.2	23.983	4.77435	0.209453	129458	2089.5	749.1	232.6	61.9566	3.22055	0.310506	20044.6	1028	257	147.8	19.4986	1.73884	0.575097
	93419.7	1856.9	466.9	330.5	50.3095	1.41271	0.70786	181248	2155.3	708.8	342.7	84.094	2.06828	0.483493	423542	6013.7	1614	412	70.4295	3.91748	0.255266	359799	2887.7	851.8	561.5	124.597	1.51701	0.659192	19492	1334.3	291.6	153.3	14.6084	1.90215	0.52572	706092	6729.7	2332.6	426.1	104.922	5.4743	0.182672	808323	8495.3	1366.8	1010.5	95.1494	1.3526	0.739318
	236520	4944.7	1220	507.6	47.833	2.40347	0.416066	432033	5462.1	1831.1	385.2	79.0965	4.75363	0.210365	12653.3	758.6	284.3	63.9	16.6798	4.44914	0.224763	331481	3285.5	1139.6	385.2	100.892	2.95846	0.338013	26396.6	817	283.1	123	32.3092	2.30163	0.434475	86697.6	1879.3	803.1	140.4	46.1329	5.72009	0.174823	67712.5	1643.1	446.8	214.4	41.2102	2.08396	0.479857
	91341.2	3492.3	1284.7	363.6	26.155	3.53328	0.283023	252970	3013.2	712.4	470.9	83.954	1.51285	0.661005	250486	6344.1	902.5	848.7	39.4833	1.06339	0.940388	362663	3709.3	1350.2	378	97.7713	3.57196	0.279959	67185.3	1649.1	731.7	120.1	40.7406	6.09242	0.164138	35577.3	992.8	363.8	127.8	35.8353	2.84664	0.351292	26807.2	820.2	247	154.1	32.6837	1.60286	0.623887
	322239	5243.9	2188.2	228.4	61.4503	9.58056	0.104378	185101	4000.3	1002.4	466.9	46.2717	2.14693	0.465782	7913.4	400.7	157.9	66.4	19.7489	2.37801	0.420519	351115	3191.3	1263.9	366.4	110.022	3.44951	0.289896	169892	3713.1	1213.4	235.5	45.7548	5.15244	0.194083	222589	4957.9	1991.5	173	44.8958	11.5116	0.0868692	69897.5	1500.4	493.8	227.3	46.5859	2.17246	0.460308
	489561	5196.4	1733.9	413	94.2116	4.19831	0.238191	581678	7328.5	2163.3	456.7	79.372	4.73681	0.211113	35116	872	317.6	147.1	40.2706	2.15908	0.463161	16931.9	774.4	313.7	72.7	21.8645	4.31499	0.23175	21433.6	803.9	305.4	103.9	26.662	2.93936	0.34021	20034.4	816.9	337.6	80.1	24.5249	4.21473	0.237263	507330	4578.5	1305.1	651	110.807	2.00476	0.498812
	168093	2543.6	672.1	362.5	66.0845	1.85407	0.539354	221682	2493	794.3	371.5	88.9217	2.13809	0.467707	302737	3954.2	1488	272.3	76.5609	5.46456	0.182997	26832.6	716.9	246.4	141.3	37.4287	1.74381	0.573458	45609.8	1283.8	536.1	125.7	35.5272	4.26492	0.234471	215370	3638	910.4	350.7	59.2002	2.59595	0.385215	72508.2	1498.8	553	185.7	48.3775	2.97792	0.335805
	63621.5	1092.6	343.3	242.5	58.2295	1.41567	0.706379	478165	3349.3	1213.3	534.8	142.766	2.2687	0.440781	43435	1799.4	550.9	122.9	24.1386	4.48251	0.223089	13895.3	852.9	321.8	72	16.2918	4.46944	0.223741	89952.2	3231.6	1408.6	100.2	27.8352	14.0579	0.0711345	178297	5155.4	1576.4	170.6	34.5846	9.24033	0.108221	43713.8	916.8	272.8	207.9	47.6808	1.31217	0.762097
	107786	2171.6	742.4	289.1	49.6346	2.56797	0.389413	80796.8	2120.7	933.2	120.1	38.0991	7.77019	0.128697	636565	9639.6	2391.9	811.6	66.0364	2.94714	0.339312	439500	3532.1	1327.1	455.8	124.43	2.91158	0.343456	20835.4	883.8	402.8	69.1	23.5748	5.82923	0.171549	114630	2083.2	704	214.5	55.026	3.28205	0.304688	190880	3256	1127.7	294.7	58.624	3.8266	0.261328
	33681.4	980.4	316.2	153.8	34.3548	2.05592	0.486401	697109	6871.9	1893.4	608.7	101.443	3.11056	0.321485	228196	3523	1399.1	228.9	64.7732	6.11228	0.163605	11715.5	554.9	182.7	91.6	21.1128	1.99454	0.501368	266587	4370.8	1281.8	505.8	60.9927	2.5342	0.394601	8663.7	732.3	328.2	36.9	11.8308	8.89431	0.112431	134492	2151.4	807.8	219.5	62.5139	3.68018	0.271726
	327217	5362	1290.7	361.5	61.0252	3.5704	0.280081	118280	4270.1	1207.8	277	27.6996	4.36029	0.229343	280229	5568.9	1586	655.6	50.3203	2.41916	0.413367	544169	4487.7	1248.4	616.2	121.258	2.02597	0.493592	51074.6	1045.4	319.4	218	48.8565	1.46514	0.68253	186926	3197.9	1155	216.7	58.4526	5.32995	0.187619	402955	5997.5	1568.5	541.2	67.1871	2.89819	0.345043
	8349.4	561.3	249.3	44.5	14.8751	5.60225	0.1785	29002.3	828.5	300.7	129.2	35.0058	2.3274	0.429664	90550.4	2340.5	603.8	248.4	38.6885	2.43076	0.411395	26999.9	934.8	257.5	160.8	28.8831	1.60137	0.624466	50527.1	2003.6	791	99.4	25.2182	7.95775	0.125664	158369	3197.8	1425.5	147.6	49.5245	9.65786	0.103543	285247	3654.1	691.8	596	78.0623	1.16074	0.861521
	898751	6681	2167.2	564.9	134.523	3.83643	0.260659	26634.9	914.6	395.1	92.5	29.1219	4.27135	0.234118	11705.3	757.7	337.1	57.8	15.4485	5.83218	0.171462	85344.1	2024.9	748	166.7	42.1473	4.4871	0.222861	501662	10454.7	1857.5	1334.5	47.9843	1.39191	0.718439	195052	2328	865.2	292.9	83.7852	2.95391	0.338534	42532.6	1167	394.7	148.6	36.4461	2.65612	0.376488
	12171.7	798.7	242.5	91.1	15.2394	2.66191	0.37567	27765.3	1040.6	458.9	79.8	26.682	5.75063	0.173894	23344.8	692.5	260.8	117.4	33.7109	2.22147	0.450153	21514.7	687.3	242.8	118.1	31.3032	2.05588	0.486409	30102.4	1248.4	416.2	104.8	24.1128	3.97137	0.251802	240236	2912.8	1192.7	278.2	82.4759	4.2872	0.233252	16161.4	1211.5	494.5	53.6	13.34	9.22575	0.108392
	126234	1966.5	558	326.2	64.1923	1.71061	0.584588	697611	6767.4	2313.9	477.2	103.084	4.84891	0.206232	12825.7	776.1	298	65.8	16.5258	4.52888	0.220805	326817	3094.6	921.4	500	105.609	1.8428	0.542652	14032.2	704.7	286.7	69.6	19.9123	4.11925	0.242762	89840.7	1850.3	498.3	255	48.5547	1.95412	0.51174	21043.3	930.5	376.6	84.7	22.615	4.44628	0.224907
	33068	1380.4	590.9	81.1	23.9554	7.28607	0.137248	520505	6797.1	2135.5	362.4	76.5775	5.89266	0.169703	157396	2377.8	865	260.4	66.194	3.32181	0.30104	19573.1	725	274.2	95.5	26.9974	2.8712	0.348286	302484	3471.5	1302.8	333.6	87.1334	3.90528	0.256064	223192	2647.8	765.7	410.9	84.2935	1.86347	0.536633	47744	1005.2	287.4	225.3	47.497	1.27563	0.783925
	28140.5	1308.4	293.4	220	21.5076	1.33364	0.74983	411076	4479.2	1705.2	321.6	91.7744	5.30224	0.1886	25352.3	780.6	293.5	114.1	32.478	2.5723	0.388756	182419	2785.8	1178.3	220.3	65.4817	5.34862	0.186964	29397.7	1392.6	575.7	74.6	21.1099	7.71716	0.129581	20247.4	905.7	294.8	105.5	22.3555	2.79431	0.35787	380117	2934.5	924.4	557.2	129.534	1.65901	0.602769
	268772	4150.7	1432.7	278.8	64.7533	5.13881	0.194598	130315	2013.5	714.2	239.1	64.7207	2.98703	0.33478	14275.6	840.7	375.8	51.6	16.9806	7.28295	0.137307	352560	3488.9	1049.4	467.5	101.052	2.24471	0.445493	129185	2226.3	761.9	236.3	58.0266	3.22429	0.310146	55262	1867.8	548.6	163.9	29.5867	3.34716	0.29876	10356.9	856.6	382.2	41	12.0907	9.32195	0.107274
	449416	6661.9	1638.8	553.7	67.4607	2.95973	0.337869	158476	3380.6	960.9	333.5	46.878	2.88126	0.34707	130797	2088	704.2	252.2	62.6421	2.79223	0.358137	13717.9	551.6	207	87.3	24.8693	2.37113	0.421739	338776	4681.6	1754.3	346	72.3632	5.07023	0.19723	122478	1635.2	500.9	336.6	74.9007	1.48812	0.67199	100735	1489.3	446.5	306	67.6391	1.45915	0.68533
	69182.7	1606.2	539.4	199.2	43.0723	2.70783	0.369299	357933	5544.1	1270	557.8	64.5611	2.2768	0.439213	212293	2850.7	904.3	334.6	74.4705	2.70263	0.37001	9013.5	465.1	179.7	70.5	19.3797	2.54894	0.392321	18224.6	902.9	296.9	91.1	20.1845	3.25906	0.306837	34066.7	995.3	387.3	117.8	34.2276	3.28778	0.304157	47399.3	1221.8	376.6	187.2	38.7946	2.01175	0.497079
	27456.1	983.1	394.6	95.3	27.9281	4.14061	0.24151	474485	6401.7	963.2	923.8	74.1185	1.04265	0.959095	160534	3269.9	660.1	466.9	49.0945	1.41379	0.707317	537001	8809	2917.4	484.9	60.9605	6.0165	0.16621	43141	1670.2	583.6	101.6	25.8298	5.74409	0.174092	111533	1575.9	490.9	304.5	70.774	1.61215	0.620289	616186	5035.6	1172.4	740.9	122.366	1.5824	0.631952
	524419	3669.6	995.7	702	142.909	1.41838	0.705032	498063	3474.2	1259	561.6	143.36	2.24181	0.446068	87077.8	1684.2	650.3	177.8	51.7028	3.65748	0.273412	146953	2740.5	1108.4	232	53.6227	4.77759	0.209311	243855	3532	1066.1	346	69.0417	3.08121	0.324547	88127.2	1768.8	637.4	190.7	49.8232	3.34242	0.299184	37508.8	1690.8	800.2	76.3	22.1841	10.4875	0.0953512
	15806.5	692.2	206.4	124.1	22.8352	1.66317	0.60126	366024	6733.7	1710.5	861	54.357	1.98664	0.503362	170354	2857.8	761.7	355.7	59.61	2.14141	0.466982	146426	2371.1	616.8	329.7	61.7544	1.87079	0.534533	102149	2447.3	1136.2	121	41.7396	9.39008	0.106495	282545	9739.4	2049.3	301	29.0106	6.80831	0.146879	39947.2	1247.9	531.7	108.5	32.0115	4.90046	0.204062
	69000.2	1286.3	488.4	188.9	53.6424	2.58549	0.386773	378236	4260.8	1034.8	563.9	88.7712	1.83508	0.544936	58648.4	2235.2	926.4	94.9	26.2385	9.76185	0.10244	181435	3496.5	928	309.5	51.8906	2.99838	0.333513	200502	3683.5	1049.1	357.3	54.4323	2.93619	0.340578	104233	2193.7	821.7	176.2	47.5146	4.66345	0.214433	29098.6	1125.9	250	198.6	25.8447	1.25881	0.7944
	10230.1	568.2	171.8	90.3	18.0044	1.90255	0.525611	68817.7	1833.6	799	116.5	37.5315	6.85837	0.145807	24475.3	1151.8	415.2	86.3	21.2496	4.81112	0.207852	134883	2024.2	674.5	275.4	66.6351	2.44916	0.408302	17819.1	938.7	331.7	115	18.9827	2.88435	0.346699	181613	2808	901.6	364.3	64.6769	2.47488	0.404059	67114.4	1159.2	394.7	225.3	57.8972	1.75189	0.570813
	208344	4474.3	1100.8	436.2	46.5646	2.52361	0.396257	84497.5	1565.5	503	249.4	53.9748	2.01684	0.495825	10782.7	497.2	209.7	67.8	21.6868	3.09292	0.323319	144018	2783.8	1042	196.4	51.7342	5.3055	0.188484	40636.7	1202.6	444.1	136.7	33.7907	3.24872	0.307814	216987	3433.1	980.5	358.3	63.2045	2.73653	0.365426	782544	7962.4	2040.5	860.9	98.28	2.37019	0.421906
	24338.4	1008.6	300.2	118.6	24.1309	2.5312	0.39507	28566.3	972	418.8	89.9	29.3892	4.65851	0.214661	60169.2	1455.7	424.8	191.6	41.3335	2.21712	0.451036	92405.8	2275.5	659.1	265.7	40.609	2.48062	0.403125	36535.5	1541.6	475.1	116.5	23.6997	4.07811	0.245212	22630	633.3	206.3	144.2	35.7335	1.43065	0.698982	40788.7	990	335.4	176.4	41.2007	1.90136	0.525939
	73811.1	1586.9	656.2	147.2	46.5128	4.45788	0.224322	381455	6947.1	1824.9	781	54.9086	2.33662	0.427969	329544	3630.4	1232.9	368.5	90.7735	3.34573	0.298889	24419.5	1151	420.4	142.1	21.2159	2.95848	0.338011	225991	2875.5	1042.3	294.4	78.5918	3.54042	0.282452	259763	3276.9	624.2	560.6	79.271	1.11345	0.89811	59074.2	1321.3	425.4	186.4	44.7092	2.28219	0.438176
	903304	11768.4	2294.3	1620.3	76.7567	1.41597	0.706228	419354	3317.3	1144.7	490.2	126.414	2.33517	0.428234	102616	2723.5	864.4	176.7	37.6779	4.89191	0.204419	191240	2486.6	775.1	338.4	76.9081	2.29048	0.436589	233245	6435.3	2724.8	152.6	36.2446	17.8558	0.0560041	293460	3030.5	1037	385.9	96.8355	2.68722	0.372131	244124	3716	1121.8	294.6	65.6954	3.80788	0.262614
	354557	3798.9	1084.6	448.1	93.3314	2.42044	0.413148	88583.4	1639.1	658.6	177.4	54.0439	3.71251	0.269359	521605	5502.9	1497.8	607.1	94.7873	2.46714	0.405328	11304.9	494.2	153.3	104.3	22.8752	1.4698	0.680365	90383.1	2145.4	458.1	362.6	42.1288	1.26338	0.79153	9069.2	444.2	166.9	72.5	20.4169	2.30207	0.434392	324079	4236.6	1182.4	617.3	76.4951	1.91544	0.522074
	362480	3452.5	1333.6	370.2	104.991	3.60238	0.277594	483478	8204.6	2511.5	414.4	58.9277	6.06057	0.165001	17383.1	623.9	247.3	93.4	27.862	2.64775	0.377679	116775	2738.5	1213	133.6	42.6418	9.07934	0.11014	62176.7	1420.8	564.5	148.3	43.7618	3.80647	0.26271	462866	5163.7	1976.1	326.5	89.6383	6.05237	0.165224	56498.9	1322.6	423.8	209.2	42.7181	2.02581	0.493629
	805646	8381.9	2188.3	561.6	96.1173	3.89655	0.256638	75053.1	1468.3	541.2	184.6	51.1156	2.93174	0.341094	446800	4582.1	1784.8	351	97.51	5.0849	0.196661	8334.2	546	228.7	49.4	15.2641	4.62955	0.216003	20749.2	984.2	347.1	81.5	21.0823	4.2589	0.234803	35552	1546.6	465.5	108.8	22.9872	4.27849	0.233727	16921.8	1172.2	504	50.1	14.4359	10.0599	0.0994048
	123872	2337.5	869.2	195.5	52.9933	4.44604	0.224919	916165	10941.7	3315.4	484.6	83.7315	6.84152	0.146166	1594142	10860.5	3903.2	547.7	146.783	7.12653	0.140321	17966.1	829.6	233.3	120.8	21.6563	1.93129	0.517788	40910.4	948.5	293.7	184.3	43.1317	1.5936	0.627511	408653	5868.7	1124.9	939.5	69.6326	1.19734	0.835185	194276	2709.6	1087	253.9	71.6993	4.28121	0.233579
	62475.8	1611.1	501.7	170.9	38.7784	2.93563	0.340642	1.16167e+06	10211.5	3426.3	960	113.761	3.56906	0.280186	78611.8	1380.7	506.6	204.6	56.9362	2.47605	0.403869	12678.7	791.4	170.5	132.3	16.0206	1.28874	0.775953	767848	10981	2506.9	1443.4	69.9252	1.7368	0.575771	295366	6751.8	1080.6	649.1	43.7463	1.66477	0.600685	13510.1	880	213.2	109.3	15.3524	1.95059	0.512664
	902046	7248.8	2808.5	432.5	124.441	6.49364	0.153997	8972.9	657.6	203.2	86.5	13.6449	2.34913	0.425689	116694	2023.9	595.3	272.2	57.6577	2.18699	0.457248	12095.7	479.4	163	98.4	25.2309	1.6565	0.603681	315456	3424.4	1346	314	92.1201	4.28662	0.233284	223045	2372.2	764	393.2	94.0247	1.94303	0.51466	116704	2062.5	764.9	203.5	56.5836	3.75872	0.266048
	214539	2423.6	809.8	354.4	88.5207	2.28499	0.437639	116288	2294.8	917.2	201.6	50.6745	4.5496	0.219799	51480.2	1264.3	520.8	132.2	40.7183	3.93949	0.25384	49168.5	973.1	286.4	237.7	50.5277	1.20488	0.829958	122640	2758.7	977.7	175.7	44.4557	5.5646	0.179707	22143.3	876.8	284.6	108	25.2547	2.63519	0.37948	49711	1496	476.5	173	33.2293	2.75434	0.363064
	1.10273e+06	5994.2	2377.5	623.4	183.966	3.81376	0.262208	43115.6	1150.7	462.6	123.3	37.469	3.75182	0.266537	170632	5137.3	1112.4	480.4	33.2144	2.31557	0.431859	40712.7	1170.2	359	187.7	34.7912	1.91263	0.522841	138898	1985.9	652.9	301.7	69.9419	2.16407	0.462092	116379	1869.4	505.9	302.4	62.2548	1.67295	0.597747	253736	4451	1347.3	278.1	57.0064	4.84466	0.206413
	411299	7433.6	2357.2	268.9	55.3297	8.76608	0.114076	52260.9	2188.8	588.2	207.4	23.8765	2.83607	0.352601	12688.8	534.2	165.4	110.5	23.7529	1.49683	0.668077	19492	670.2	206.3	126.4	29.0839	1.63212	0.6127	327760	5991.6	1573.8	489.3	54.7032	3.21643	0.310904	14600	567.3	213.9	89.9	25.7359	2.37931	0.42029	408957	3001.3	896	590.3	136.26	1.51787	0.658817
	327111	3055.8	1030.6	422.9	107.046	2.43698	0.410343	518726	5434.3	2177.8	398.7	95.454	5.46225	0.183075	643875	6216.3	1774.6	533.7	103.578	3.32509	0.300744	23339.7	947.3	299.5	129.8	24.6381	2.3074	0.433389	62921.9	1674.4	649.6	162.2	37.5788	4.00493	0.249692	23370.1	756.1	205.8	152.7	30.9087	1.34774	0.741983	33032.5	877	269.4	166.6	37.6653	1.61705	0.618411
	8795.5	504.4	183.5	75.4	17.4375	2.43369	0.410899	49128	1167.5	320.5	228.7	42.0797	1.4014	0.713573	127385	2001.2	630.8	276.7	63.6543	2.27973	0.438649	26868	1168.2	501.1	74.3	22.9995	6.74428	0.148274	250349	3227.3	1306.8	261.2	77.5724	5.00306	0.199878	288999	6132.6	2114.4	376.4	47.125	5.61743	0.178017	78850.1	2368.2	583.8	225.2	33.2954	2.59236	0.385749
	865318	7912.6	1969.1	603.8	109.36	3.26118	0.306638	9895.6	920.2	315.3	95.2	10.7537	3.31197	0.301935	586372	5678.3	1210.3	715.4	103.265	1.69178	0.591093	40976.3	1198	339.3	193.4	34.2039	1.7544	0.569997	164275	2336.3	968.7	226.8	70.3143	4.27116	0.234128	15370.6	626.7	223	98.9	24.5262	2.2548	0.443498	12222.4	1217.7	299.9	80.2	10.0373	3.7394	0.267422
	742298	5871.8	2125.1	474	126.417	4.48333	0.223048	171956	3286	1266.1	221.5	52.3297	5.71603	0.174947	7817.1	415.5	162.8	63.1	18.8137	2.58003	0.387592	111512	2087.4	456.5	408.7	53.4217	1.11696	0.89529	10179.4	788.3	178.1	100.9	12.9131	1.76511	0.566536	54298.8	1304.8	493.6	149.5	41.6147	3.30167	0.302877	55180.9	1144	398.3	183.6	48.2351	2.16939	0.460959
	518999	4457.5	1709.3	405.2	116.433	4.21841	0.237056	67225.9	2160.2	876.2	225.9	31.1202	3.87871	0.257818	308567	3689.2	1308.9	316.7	83.6406	4.13293	0.241959	68736.6	1258.4	455.7	199.3	54.6222	2.2865	0.437349	229884	4526.1	1226.7	406.2	50.7907	3.01994	0.331132	99219.1	1764.2	668.6	204.8	56.2403	3.26465	0.306312	268163	3918.8	1051.1	459.3	68.43	2.28848	0.436971
	129828	2027.2	650.8	284.7	64.0432	2.28591	0.437462	57421.6	2182.3	779.4	123	26.3124	6.33659	0.157814	130148	2451.2	943.9	181.2	53.0955	5.20916	0.191969	28028.9	803.3	255.8	152	34.8922	1.68289	0.594214	268883	6108.1	1517.8	419.7	44.0208	3.61639	0.276519	300912	3803.5	1581.8	257.6	79.1145	6.14053	0.162852	10123.7	522.9	187.6	75.6	19.3607	2.48148	0.402985
	152960	3276.4	1507.9	135.2	46.6855	11.1531	0.0896611	33762.5	948.6	324.4	140.4	35.5919	2.31054	0.432799	139993	2065.7	578.6	330.9	67.7701	1.74856	0.571898	128693	1843.3	618.5	288.1	69.8166	2.14682	0.465804	383823	5633.6	1966.9	276.9	68.131	7.10329	0.14078	192847	2507.7	777.9	370.4	76.9018	2.10016	0.476154	224820	5473.2	995.9	535.2	41.0764	1.8608	0.537403
	98595.6	4203.5	2024	80.9	23.4556	25.0185	0.0399704	98600.7	2863.2	946.6	169.5	34.4372	5.58466	0.179062	251039	3053.5	1079.9	309.5	82.2135	3.48918	0.286601	19101.7	1165.7	497.3	69	16.3865	7.20725	0.138749	115862	2710.3	1201	129.9	42.7488	9.24557	0.10816	41777.3	1014	328.2	168.1	41.2005	1.95241	0.512188	34928.5	1109.5	269.4	202.4	31.4813	1.33103	0.751299
	315649	8478.3	3871.9	139.9	37.2302	27.6762	0.0361321	62044.9	1355.2	457.5	181.3	45.7828	2.52344	0.396284	39891.4	1075.3	427.9	123	37.0979	3.47886	0.28745	330528	2650	765.3	562.6	124.727	1.36029	0.735137	23228.2	760.6	278.3	112	30.5393	2.48482	0.402443	87138.7	3891.1	870.5	178.7	22.3944	4.87129	0.205284	276584	3081.3	938.3	404.6	89.762	2.31908	0.431205
	7862.7	798	307.9	72.6	9.85301	4.24105	0.235791	22630	868	316.6	97.9	26.0714	3.23391	0.309223	68614.9	1605.3	689.8	133.1	42.7427	5.18257	0.192954	103488	2008.4	535.6	348.2	51.5274	1.5382	0.650112	408764	9097.5	2409.9	1031.1	44.9315	2.33721	0.42786	37660.9	1617.2	384.4	166.3	23.2877	2.31149	0.432622	329103	3386.1	930.7	501.4	97.1924	1.8562	0.538734
	339638	5525.7	890.8	598.2	61.4651	1.48913	0.671531	166004	2170.1	812.4	278.7	76.496	2.91496	0.343058	243075	3747.2	1307.1	246.5	64.8684	5.30264	0.188585	68832.9	2372.3	1106.7	85.3	29.0153	12.9742	0.077076	13712.8	677.3	267	68.4	20.2463	3.90351	0.25618	309672	4006.9	1852.4	224.8	77.2847	8.24021	0.121356	47176.2	1719.1	682.5	108.4	27.4424	6.29613	0.158828
	676578	5052.6	1576.7	567.8	133.907	2.77686	0.360119	64488.4	1316.4	447.9	194.6	48.9885	2.30164	0.434472	31501.5	854.5	319.5	129.7	36.8654	2.46338	0.405947	184654	2202.8	761.8	320.1	83.8272	2.37988	0.420189	41954.7	1122.6	418.5	139.7	37.3728	2.99571	0.333811	123628	1927.2	663.6	255.7	64.1493	2.59523	0.385322	26898.5	782	263.3	140.8	34.3971	1.87003	0.534751
	251941	2442.5	847.7	390.3	103.149	2.17192	0.460422	48245.9	1099.1	407.3	157.6	43.8958	2.58439	0.386938	11710.4	653.3	301.8	51.3	17.925	5.88304	0.16998	134112	2985.9	1279.7	157.8	44.9151	8.10963	0.12331	18843.1	962.5	320.2	105.5	19.5772	3.03507	0.329482	112040	3935.6	1105.7	159.1	28.4683	6.94972	0.143891	12166.7	549.7	208.6	79.4	22.1333	2.6272	0.380633
	16703.8	583.6	205.5	111	28.622	1.85135	0.540146	535713	3986	1372.2	514.1	134.399	2.66913	0.374654	11806.7	615	269.9	59.6	19.1979	4.52852	0.220823	140895	2201.2	882.9	214.7	64.0083	4.11225	0.243176	20972.3	1986.3	959.9	101.9	10.5585	9.42002	0.106157	371215	5954.4	1627	665.7	62.343	2.44404	0.409158	524920	6383.4	2313	338.9	82.2321	6.82502	0.14652
	35060.3	2292.3	1026.6	49.1	15.2948	20.9084	0.0478278	409241	4089.2	1175.5	491.7	100.078	2.39069	0.41829	1.2318e+06	13823.5	2831.1	2002.9	89.109	1.4135	0.707464	19208.1	670	227	110.3	28.6688	2.05802	0.485903	40793.8	2146	425	148.2	19.0092	2.86775	0.348706	419704	5025.6	1512.4	611.3	83.5133	2.47407	0.404192	45756.8	970.7	281.9	213.9	47.1379	1.31791	0.75878
	102185	1705.1	482.3	288.2	59.9289	1.67349	0.597553	137392	3057.3	688.1	410.8	44.939	1.67502	0.597006	21864.5	1182.2	431.3	99.8	18.4948	4.32164	0.231393	11756	549.1	232.6	66.7	21.4096	3.48726	0.286758	107949	2325.2	998.9	144.8	46.4256	6.89848	0.144959	183346	2620.5	918.8	271.3	69.9662	3.38666	0.295276	258917	4165	1754.8	242.4	62.1649	7.23927	0.138135
	57381	1601.3	633.5	126.6	35.834	5.00395	0.199842	265466	8418.2	1621.5	305.8	31.5348	5.30249	0.188591	296329	4075.1	945.3	465.8	72.717	2.02941	0.492754	255753	3261.2	1239	285.7	78.4231	4.33672	0.230589	536661	7428.7	1633.9	1071	72.2416	1.52558	0.655487	35714.2	1101.2	316	166.7	32.4321	1.89562	0.527532	63981.4	1425.3	494.2	183.1	44.8898	2.69907	0.370498
	393586	4811.4	1161.9	563.3	81.8029	2.06267	0.484809	1.44502e+06	11735.5	1954.9	1589.2	123.133	1.23012	0.812932	15857.2	814.2	259.7	95.5	19.4758	2.71937	0.367732	117074	1586.9	495.4	316.5	73.7751	1.56524	0.638878	12435.3	567.6	215.6	87.1	21.9086	2.47532	0.403989	34872.7	1225.4	419.2	151	28.4582	2.77616	0.36021	29291.2	819.5	304.8	126.3	35.7428	2.4133	0.41437
	462303	5905.2	2058.1	364.5	78.2874	5.64636	0.177105	225195	3040.2	807.9	399.9	74.0724	2.02026	0.494987	278784	6253.9	1542.2	386.3	44.5776	3.99223	0.250486	95548.9	1586.2	572.9	234.1	60.2376	2.44724	0.408623	51987.1	1508.4	660.6	104.7	34.4651	6.30946	0.158492	15613.9	716.8	275	82	21.7828	3.35366	0.298182	287437	4223.6	958.7	525.5	68.0551	1.82436	0.548138
	34918.3	1295.3	556.3	93.1	26.9577	5.9753	0.167356	490149	3535.8	1251.4	532.7	138.625	2.34916	0.425683	91554.1	2283.6	915.1	142.1	40.092	6.43983	0.155284	35197.1	1099	330.8	197.5	32.0265	1.67494	0.597037	27329.4	1120	516.8	71.1	24.4013	7.26864	0.137577	85354.2	2918	786.5	270.7	29.2509	2.90543	0.344183	86276.8	1798.8	657.5	177	47.9635	3.71469	0.269202
	406858	3503.1	1218.4	466.7	116.142	2.61067	0.383043	79321.6	1681.1	677.7	161.1	47.1843	4.2067	0.237716	74982.1	1996.1	908.2	113.4	37.5643	8.00882	0.124862	68721.4	1451.8	423.8	256.6	47.3353	1.6516	0.605474	63185.5	1430.6	638.7	135.1	44.1671	4.72761	0.211523	102611	2002.5	792.1	181.1	51.2412	4.37383	0.228633	174586	2526.3	944.8	274.8	69.1076	3.43814	0.290855
	42071.3	1122.8	362.2	153.7	37.47	2.35654	0.424351	12491.1	683.7	287.5	58.7	18.2699	4.89779	0.204174	11543.1	521.3	166.2	93.5	22.1429	1.77754	0.562575	139248	1990.2	613.2	316.2	69.9666	1.93928	0.515656	535703	9178.7	2072.1	533.6	58.3637	3.88325	0.257517	89085.3	1927	766.7	168.7	46.23	4.54475	0.220034	95361.3	1656.4	501.2	283.1	57.5714	1.7704	0.564844
	147369	2375.5	777.6	255	62.0369	3.04941	0.327932	155018	3304.2	1382.1	161.7	46.9156	8.54731	0.116996	65887.5	1402.5	470.9	206.3	46.9786	2.2826	0.438097	166009	2188.4	699.3	329.8	75.8586	2.12038	0.471614	132835	2295.7	978.7	184.8	57.8624	5.296	0.188822	29620.8	989	376.4	106.5	29.9503	3.53427	0.282944	83032.4	1502.6	418.5	273.4	55.2592	1.53072	0.653286
	66622.6	1502.1	619.1	148.3	44.353	4.17465	0.239541	241990	2977.5	820.7	473.1	81.2728	1.73473	0.576459	40677.2	1674.9	607.9	91.6	24.2863	6.63646	0.150683	151404	1668.8	479.2	411.4	90.7263	1.1648	0.858514	19101.7	652.7	231	111	29.2657	2.08108	0.480519	288193	4120.7	1238.6	331.5	69.9378	3.73635	0.267641	70379.1	2268.6	891.6	110.6	31.0231	8.06148	0.124047
	11674.9	625.5	154.7	110.3	18.6649	1.40254	0.712993	14797.7	543.2	169.2	119.3	27.2417	1.41827	0.705083	67089	1269	445.6	200.7	52.8676	2.22023	0.450404	322254	3001.1	1171.2	359.4	107.379	3.25876	0.306865	403725	3434.9	986.8	575.9	117.536	1.71349	0.583604	77065.7	1721.2	510.7	205.7	44.7744	2.48274	0.40278	618918	4767.9	1654.7	548.8	129.809	3.01512	0.331661
	594316	7785.5	2094.5	1190.4	76.3363	1.75949	0.568346	454709	3461.7	1099.9	571.2	131.354	1.9256	0.51932	27157	938.1	367.6	101.2	28.9489	3.63241	0.275299	21053.4	678.8	242.8	118.9	31.0156	2.04205	0.489703	20500.8	823.6	346.3	80.5	24.8917	4.30186	0.232457	250704	3247.1	893.7	399.2	77.2086	2.23873	0.446682	15811.6	680.5	271.3	80.2	23.2353	3.38279	0.295614
	75778	1538.4	643.4	152.8	49.2577	4.21073	0.237488	125509	2287.1	574.8	294.6	54.877	1.95112	0.512526	121672	1929.8	845.1	190.6	63.0489	4.43389	0.225535	630821	4350.7	1304.8	643.6	144.993	2.02735	0.493256	1.06014e+06	11861.1	4263	427.9	89.3793	9.96261	0.100375	14072.8	616.9	221.1	88.3	22.8121	2.50396	0.399367	11259.2	514.9	169.6	92.8	21.8668	1.82759	0.54717
	729381	10244.4	2479.2	569.4	71.198	4.35406	0.229671	9900.6	695.5	227.4	70.1	14.2352	3.24394	0.308267	57487.5	1332.3	405.3	192.9	43.1491	2.10109	0.475944	156509	2142.2	685.6	331.8	73.0599	2.06631	0.483956	1.98644e+06	13406.3	3586.8	753.6	148.172	4.75955	0.210104	330660	3407	1125.7	406.9	97.053	2.76653	0.361464	399127	3448.4	986.2	542.2	115.743	1.81889	0.549787
	91229.7	1654.8	532.9	261.8	55.1303	2.03552	0.491274	171413	2832.6	1077.3	214.5	60.5144	5.02238	0.199109	133169	2085.7	750.3	238.3	63.8487	3.14855	0.317606	146654	1672.5	521.2	370.8	87.6854	1.40561	0.711435	115979	1876.5	574.1	280.6	61.8059	2.04597	0.488765	687558	9775.4	2988.3	344.5	70.3356	8.67431	0.115283	95609.7	2039.8	686.3	191.1	46.8721	3.59131	0.27845
	178226	2712.5	666.8	415	65.7056	1.60675	0.622376	15395.9	603.3	214.7	95.7	25.5195	2.24347	0.445738	10737.1	588.3	162.7	110	18.2511	1.47909	0.676091	14904.2	538.3	184.8	106.6	27.6875	1.73358	0.57684	132272	2610.5	1092.7	167	50.6692	6.54311	0.152832	243176	2893.4	895	380.5	84.0451	2.35217	0.42514	148459	2311.4	953.4	207	64.2289	4.6058	0.217118
	1.14866e+06	18517.9	4300.6	1549.6	62.03	2.7753	0.360322	1.50739e+06	14329.1	2874.7	1148.2	105.198	2.50366	0.399416	12136.2	728.8	269.2	61.3	16.6523	4.39152	0.227712	33412.7	815.6	247.8	180.9	40.967	1.36982	0.730024	53391.4	1259.6	388	216.2	42.3876	1.79463	0.557216	144190	3257.8	1234.6	159.8	44.26	7.72591	0.129435	154192	4576	1437.9	294.7	33.6958	4.8792	0.204952
	11517.8	620.5	273.8	57.3	18.5621	4.77836	0.209277	707775	7718.5	2254.7	883.2	91.6986	2.55288	0.391715	26604.4	1233.7	534.9	81.5	21.5647	6.56319	0.152365	381060	3925.4	1265.9	425.4	97.0754	2.97579	0.336046	237382	4235.9	1975.7	171.5	56.0404	11.5201	0.0868047	89278	1578	579.3	204.2	56.5767	2.83692	0.352494	1.47161e+06	6531.8	1894.5	1029.8	225.3	1.83968	0.543574
	77861.6	1498.7	610.2	168.2	51.9528	3.62782	0.275647	1.04489e+06	11686.1	4297.9	529.7	89.4133	8.11384	0.123246	15674.7	653.8	268.4	80.7	23.9748	3.3259	0.300671	194170	2029	621.6	417.7	95.6973	1.48815	0.671976	19269	1063	362.7	83.6	18.127	4.33852	0.230494	113890	2199.3	895.7	170.7	51.7847	5.24722	0.190577	130513	2796.8	655.2	343.2	46.665	1.90909	0.52381
	181582	4428.4	964.8	323.3	41.0041	2.98423	0.335095	171956	2519.4	938.6	270	68.2526	3.4763	0.287662	30634.6	947.2	361.6	114.9	32.3423	3.14708	0.317754	254876	3318.3	1144.7	315.6	76.8093	3.62706	0.275705	583037	5529.7	2184.1	360.9	105.437	6.05181	0.16524	135268	1849.9	733.2	242.9	73.1217	3.01853	0.331288	17089.1	608.1	186.8	128.6	28.1025	1.45257	0.688437
	164681	2427.2	921.9	239.2	67.8481	3.8541	0.259464	305698	2937	1188.8	334.2	104.085	3.55715	0.281124	697013	8581.9	2781.7	446.8	81.2189	6.22583	0.160621	42689.8	1022.1	288.5	198.1	41.7668	1.45634	0.686655	12116	522.3	154.2	115.8	23.1974	1.33161	0.750973	191214	4139.9	1341	199.4	46.1881	6.72518	0.148695	26716	986.5	268.7	154.6	27.0816	1.73803	0.575363
	15786.2	887.5	397.3	57.2	17.7873	6.9458	0.143972	29331.8	846.8	262.3	155.8	34.6384	1.68357	0.593976	146056	3029.6	739.6	310.7	48.2096	2.38043	0.420092	19654.2	769.8	298.2	87.1	25.5316	3.42365	0.292086	480411	4323.7	1298.1	565.3	111.111	2.2963	0.435483	567534	6442	2336.1	366.9	88.0991	6.36713	0.157057	21600.9	893.4	242.1	126.5	24.1783	1.91383	0.522511
	9130.1	590.4	255.2	48.3	15.4643	5.28364	0.189263	916824	8218.6	2119.6	668.4	111.555	3.17115	0.315343	24921.4	907.3	332.9	106.1	27.4677	3.13761	0.318714	9079.4	556.9	216.2	56	16.3035	3.86071	0.259019	904287	8278.1	1645.6	786	109.238	2.09364	0.477637	79899.5	1472.8	549.3	190.8	54.2501	2.87893	0.347351	718888	9443.5	2086.3	554.6	76.1251	3.76181	0.265829
	203964	4848.3	1072.7	730.7	42.0692	1.46804	0.681178	636803	4987.6	1431	636.9	127.677	2.24682	0.445073	86611.4	3327.7	1367.1	93.5	26.0274	14.6214	0.0683929	141706	2365.4	675.5	314.1	59.9079	2.15059	0.464989	1.32446e+06	11554	3292.1	601.3	114.632	5.47497	0.182649	629027	7113.5	1723.7	534.7	88.4272	3.22368	0.310205	136875	2084.3	706	256.4	65.6695	2.75351	0.363173
	10808.1	495.6	186.6	76	21.8081	2.45526	0.407288	54734.8	1335.5	550.9	137.5	40.9845	4.00655	0.249592	79899.5	2246	977.4	148	35.5741	6.60405	0.151422	37133.7	1052.8	383.8	127.7	35.2714	3.00548	0.332725	126381	1791.8	603	277.6	70.5331	2.17219	0.460365	437817	7522.2	2783.6	229.6	58.2034	12.1237	0.0824831	728068	7023.6	1227.2	839.9	103.66	1.46113	0.684404
	133767	2964.2	975.2	205.9	45.1277	4.73628	0.211136	71864.4	3330.3	834	134.4	21.579	6.20536	0.161151	88492.2	1420.7	443.8	266.5	62.2877	1.66529	0.600496	16419.9	568.2	198.7	109.1	28.8981	1.82126	0.549069	570921	9056.3	2393.7	885.4	63.0413	2.70352	0.369888	930653	7916.6	3121.5	440.3	117.557	7.08948	0.141054	74165.9	1513.3	490.3	228.5	49.0094	2.14573	0.466041
	288208	4422.9	1794.4	221.2	65.1627	8.11212	0.123272	239572	5377.1	1227.4	304.7	44.5541	4.02822	0.248248	16257.7	584.2	207.5	102.8	27.829	2.01848	0.495422	100806	2645.4	1121.4	144.9	38.1061	7.73913	0.129213	90317.2	1472.6	383.6	310.7	61.3318	1.23463	0.809958	641497	6411.4	1759	519	100.056	3.38921	0.295054	1.02472e+06	7534.5	2654.9	534.8	136.003	4.96429	0.201439
	222194	2650.3	819.2	364.7	83.8372	2.24623	0.44519	69360.1	2570.2	629.5	189	26.9863	3.33069	0.300238	25321.9	1369.2	559.6	84.7	18.4939	6.60685	0.151358	236880	2544.7	767.5	445.4	93.0876	1.72317	0.580326	39485.9	1475.4	702.4	78	26.7628	9.00513	0.111048	374049	5062	2284.9	223.3	73.8935	10.2324	0.0977286	694174	4430.8	1498.9	608.2	156.67	2.46449	0.405764
	1.27946e+06	7697.2	3102.5	548.6	166.224	5.6553	0.176825	18255.1	696.9	259.3	98.4	26.1947	2.63516	0.379483	7948.9	596.4	184	85.6	13.3281	2.14953	0.465217	175332	2146.4	762.4	324.8	81.6864	2.34729	0.426023	37458.1	2395.5	705.7	131.9	15.6369	5.35027	0.186907	217560	2755.3	710.3	410.2	78.9606	1.73159	0.577502	319142	3499.6	906.6	507.4	91.1938	1.78676	0.559674
	279509	2597	957	382	107.628	2.50524	0.399164	8288.5	665.7	300.3	39.5	12.4508	7.60253	0.131535	307492	3347.8	910.2	494.1	91.849	1.84214	0.542848	12693.9	577.7	212.7	79.8	21.9732	2.66541	0.375176	254106	2970.8	1025.2	336.9	85.5345	3.04304	0.328619	625377	5850.5	2175.9	381.8	106.893	5.69906	0.175468	65988.9	1423.7	410.9	216.1	46.3503	1.90143	0.525919
	675265	5536.9	2147.3	426.9	121.957	5.02998	0.198808	664477	6403.8	1683.1	630.7	103.763	2.66862	0.374725	29995.9	916.5	362.4	108.5	32.7288	3.34009	0.299393	166536	2546.9	608.6	395.9	65.3878	1.53726	0.650509	99731.1	2085	713.2	194.5	47.8327	3.66684	0.272715	1.04711e+06	7857.5	1990.1	1028.8	133.262	1.93439	0.516959	177005	3675.7	887.8	304.5	48.1554	2.9156	0.342983
	669364	4310.5	1507.7	588.5	155.287	2.56194	0.39033	546065	4239	1578.8	456.1	128.819	3.46152	0.28889	214919	2791	964.1	295.8	77.0043	3.2593	0.306815	191072	3542	1441.3	217.3	53.9448	6.63277	0.150767	506944	7519.8	1440.4	813.9	67.4146	1.76975	0.565051	135907	2789.2	710.1	263.7	48.7261	2.69283	0.371356	228814	2509.9	701.2	447.3	91.1647	1.56763	0.637906
	384426	4577	1833.8	296.4	83.9908	6.18691	0.161632	859788	13637.7	2305.5	1260.3	63.0449	1.82933	0.546649	272685	4538.3	1242	429.3	60.0853	2.89308	0.345652	161583	2881.6	1118.3	203.4	56.0742	5.49803	0.181883	29098.6	1854.7	386.7	143.7	15.6891	2.69102	0.371606	767078	6185.8	2229.6	475.6	124.006	4.68797	0.213312	141361	2786.4	888.2	229	50.7326	3.8786	0.257825
	89039.7	1802.5	640.5	189.8	49.3979	3.3746	0.296331	52205.1	1851	617.1	167.1	28.2037	3.693	0.270783	158278	2959.5	1002.2	237.9	53.4814	4.21269	0.237378	90606.2	1578.6	609.4	196.9	57.3966	3.09497	0.323105	398240	4818.2	1497.1	488	82.6533	3.06783	0.325964	215112	4438.7	1274.9	232.9	48.4628	5.47402	0.182681	109764	3236.8	552.3	287.9	33.9111	1.91837	0.521275
	15862.3	680.1	228.5	96.2	23.3235	2.37526	0.421007	542755	5478	1848.3	438.4	99.079	4.21601	0.237191	194398	4454.3	2044	136.4	43.6427	14.9853	0.0667319	169046	3164.6	747.8	357.9	53.4177	2.08941	0.478604	275306	3898.7	1265.7	434.4	70.6149	2.91367	0.343209	14929.5	821	310.5	75.1	18.1845	4.13449	0.241868	169989	2685	510.7	485.5	63.3105	1.05191	0.950656
	248094	6828.5	1577.4	622	36.3321	2.53601	0.39432	40509.9	1211.6	456.5	120.9	33.435	3.77585	0.264841	12856.1	803.3	301.5	58	16.0041	5.19828	0.192371	69780.9	1659.2	520	204.5	42.057	2.54279	0.393269	90727.8	3009	543.5	269.6	30.1521	2.01595	0.496044	26533.5	770.3	287.7	123	34.4457	2.33902	0.427529	581450	5470.4	1113.4	763.6	106.29	1.45809	0.685827
	435714	4292.3	1580.4	425.6	101.51	3.71335	0.269299	50177.3	1388.2	557.9	118.7	36.1456	4.70008	0.212762	79230.3	1733.9	657.7	177.8	45.6948	3.6991	0.270336	228089	3141.4	908.8	470.6	72.6076	1.93115	0.517826	268138	4576	2105.4	180.3	58.5966	11.6772	0.0856369	22873.3	850.9	308.8	98.7	26.8813	3.12867	0.319624	457669	3594.9	1041.4	632.2	127.311	1.64726	0.607067
	590869	4439.6	1727.8	446.5	133.091	3.86965	0.258421	58420.3	1349.1	550.9	141.4	43.3032	3.89604	0.256671	518300	9944.3	3025.1	398.8	52.1203	7.58551	0.13183	166764	3481.7	809.5	449	47.8974	1.8029	0.554663	82424.1	1849.1	479.4	234.4	44.5753	2.04522	0.488945	42568.1	1128.8	415.5	136.4	37.7109	3.04619	0.328279	106534	2142.9	550.9	274.6	49.715	2.00619	0.498457
	186692	3697.9	1188.3	332.6	50.4861	3.57276	0.279896	228566	3410.9	959.2	331.3	67.0105	2.89526	0.345392	81420.3	1596.2	629.2	177.6	51.0088	3.54279	0.282263	11842.2	861.2	366.8	72.5	13.7508	5.05931	0.197655	18949.6	992.8	441.3	58.8	19.087	7.5051	0.133243	258907	3969.8	1207.8	303.2	65.2191	3.98351	0.251035	460914	4586.6	957.9	662.9	100.491	1.44501	0.692035
	86205.9	1934.6	692.5	201	44.5601	3.44527	0.290253	213870	3893.9	787.7	555	54.9243	1.41928	0.704583	79068.1	1726	589.6	262.5	45.81	2.2461	0.445217	409221	3178.5	824	672.1	128.746	1.22601	0.815655	234842	3642.5	1304.9	243.9	64.4727	5.35014	0.186911	204537	3871.5	1166.8	266.7	52.8314	4.37495	0.228574	369953	3263.3	869.2	587.1	113.368	1.4805	0.675449
	49731.2	1972.5	648.7	159.9	25.2123	4.05691	0.246493	1.14682e+06	8688.7	2081	741.5	131.99	2.80647	0.356319	80857.6	1449.2	358.3	296.2	55.7946	1.20966	0.826682	15477	760.8	265.8	87.7	20.3431	3.03079	0.329947	720505	9045.4	3182	481.7	79.6543	6.60577	0.151383	474480	6065.2	1714.1	584.1	78.2298	2.9346	0.340762	462313	5307.8	2013.5	381.2	87.1007	5.282	0.189322
	299614	5967.9	2401.9	208.3	50.2043	11.531	0.086723	54704.4	1833.9	645.9	159	29.8295	4.06226	0.246168	46725.1	1162.7	478.1	130.2	40.1867	3.67204	0.272328	61036.1	1091.7	301.1	269.3	55.9092	1.11808	0.894387	547079	7704.4	2737.8	642	71.0087	4.26449	0.234495	16080.3	699.8	235.1	103.2	22.9784	2.2781	0.438962	145382	2159.2	700.3	273.5	67.3312	2.56051	0.390547
	435364	7877.5	1621.5	431.2	55.2667	3.76044	0.265927	614173	3781.1	1125.3	719.5	162.432	1.564	0.639385	68812.6	1855.3	673.2	140	37.0897	4.80857	0.207962	11345.4	616.6	238.8	64.5	18.3999	3.70233	0.270101	7624.4	740.5	347.1	36	10.2963	9.64167	0.103717	105916	1871.7	669.5	211.2	56.5881	3.16998	0.315459	159206	2199.2	795.7	275.5	72.3926	2.8882	0.346236
	45822.7	1785.9	784.3	80.7	25.658	9.71871	0.102894	212131	5001.5	1936.6	424.4	42.4134	4.56315	0.219147	331298	4496.7	1719.4	271.8	73.6759	6.32597	0.158078	187909	2386.6	654.4	427.4	78.735	1.53112	0.653117	10473.5	570.4	230.2	60	18.3617	3.83667	0.260643	140971	2405.6	920.7	206	58.6012	4.46942	0.223743	17008	869.1	309.7	77	19.5697	4.02208	0.248628
	280269	3045.9	1133.7	328	92.0152	3.4564	0.289318	97967	1396.1	391.7	322	70.1719	1.21646	0.822058	46218.1	1496.1	534.6	161.2	30.8924	3.31638	0.301534	14082.9	944.9	424.3	48.7	14.9041	8.71253	0.114777	7766.4	646.2	271.2	38.4	12.0186	7.0625	0.141593	92583.2	2468.3	1038.5	119.8	37.5089	8.66861	0.115359	144793	2212.6	629.5	303.2	65.4404	2.07619	0.481652
	90094.1	2802.1	1225.7	107.9	32.1524	11.3596	0.0880313	8886.7	438.3	156.7	74.6	20.2754	2.10054	0.476069	523476	5975.2	2287.4	323.5	87.6081	7.07079	0.141427								113292	2302.8	779.1	208	49.1975	3.74567	0.266975	27091.1	1005.7	314.7	138.2	26.9376	2.27713	0.439148	150334	3375.2	796.3	329.8	44.5409	2.41449	0.414166
	666657	7771.5	2343.1	472.5	85.7823	4.95894	0.201656	11685.1	560.2	220	72.3	20.8588	3.04288	0.328636	16754.5	688.3	270.7	82.8	24.3419	3.26932	0.305874					51.3084	3.38421	0.401391	677810	8892.3	2516.8	422.1	76.2244	5.96257	0.167713	278312	3672.5	1178.8	371.1	75.7828	3.1765	0.314812	168995	3617.3	570.4	512.4	46.7185	1.11319	0.898317
	60108.4	1253.9	440.6	178.6	47.9372	2.46697	0.405356	123608	2155.9	886.8	195.5	57.3348	4.53606	0.220456	272640	4523.6	995.3	704.2	60.2705	1.41338	0.707525					29.5897	2.20122	0.198548	15674.7	652	265.2	78.9	24.041	3.36122	0.297511	253736	3338.3	1405.2	240.5	76.0075	5.84283	0.17115	1.00398e+06	12916.3	2158.2	928.9	77.7295	2.32339	0.430405
	430538	5396.8	1505.7	551.6	79.7765	2.7297	0.366341	716540	6028.6	2550	514.9	118.857	4.95242	0.201922	160083	2318.9	782.4	275.9	69.034	2.83581	0.352633								55616.9	1884.4	650.5	155.6	29.5144	4.18059	0.239201	469081	3948.7	1286.5	494.3	118.794	2.60267	0.384221	1.00128e+06	8601.8	2640.4	646.1	116.404	4.08667	0.244698
	222893	2749.7	1083.4	270.9	81.061	3.99926	0.250046	897073	6187.9	1968.6	753	144.972	2.61434	0.382505	328110	3701.5	1565.3	285.1	88.6423	5.49035	0.182138								292765	4160.7	1085.4	576.5	70.3645	1.88274	0.531141	71778.2	1762.8	778.5	125	40.7183	6.228	0.160565	25088.7	1017.5	258.5	149.3	24.6572	1.73141	0.577563
	13190.7	978.9	351.8	61.6	13.475	5.71104	0.175099	59489.9	1306.4	483.4	162.4	45.5373	2.9766	0.335954															7943.8	559.2	167	70.9	14.2057	2.35543	0.424551	192431	2341.5	912.6	279.6	82.1828	3.26395	0.306377	66049.8	1770.5	466.8	203.2	37.3057	2.29724	0.435304
	81141.5	1911	783.8	143.5	42.4602	5.46202	0.183082	15304.6	578.5	184.1	110.6	26.4557	1.66456	0.60076					48.3121	4.00288	0.327699								238112	4378.1	1442.9	250.7	54.387	5.75548	0.173747								8567.4	727.1	187	82.9	11.783	2.25573	0.443316
	179144	2947	1165.5	208.4	60.7886	5.59261	0.178807	765785	9457.9	2497.4	593.6	80.9678	4.20721	0.237687					29.1154	2.32052	0.167935								100958	1575.9	644.2	212.9	64.0637	3.02583	0.330487					57.2269	3.76877	0.344578	167905	3025.8	642.1	349.6	55.4911	1.83667	0.544463
	108248	2747.9	1228	129.3	39.3929	9.49729	0.105293	35491.2	960.1	332.9	140.8	36.9661	2.36435	0.42295															147171	2383.2	765.4	294.2	61.7535	2.60163	0.384374					29.0597	2.12791	0.172657	116714	1819.3	690.5	226.7	64.1531	3.04588	0.328313
	490327	3710.6	1250.6	535.3	132.142	2.33626	0.428035	918041	6242	2528.9	503.7	147.075	5.02065	0.199178															238467	2950.2	911.4	344.5	80.8307	2.64557	0.37799								325286	3559.9	1372.3	308.7	91.375	4.44542	0.224951
	36145.1	1432.1	391.8	182.6	25.2392	2.14567	0.466054	24140.7	998.9	376.1	89	24.1673	4.22584	0.236639															224632	3208.1	758.5	497.4	70.0203	1.52493	0.655768								109287	1453.2	418.3	341.7	75.2044	1.22417	0.816878
								124982	2895.4	973	195.8	43.1657	4.96936	0.201233															92684.6	1312	410.9	307.5	70.6438	1.33626	0.748357								113611	1757.7	477.2	334.7	64.6363	1.42575	0.701383
					60.4841	4.77783	0.313625	11046.3	753.9	225.1	99.5	14.6522	2.26231	0.442026															11558.3	610.8	269.8	57.9	18.9232	4.65976	0.214603								11325.1	797.7	287.1	67.5	14.1972	4.25333	0.23511
					36.1325	4.60716	0.159852	512957	6746.9	2363.4	315.6	76.0285	7.48859	0.133536															22092.6	763.1	284	102.6	28.9511	2.76803	0.361268								386900	4256.3	1009.7	541.7	90.9005	1.86395	0.536496
								864452	7646.5	2015.8	798.4	113.052	2.5248	0.396071															148160	3316.9	888.7	293.1	44.6681	3.03207	0.329808								166754	2522.2	839.5	269.1	66.1146	3.11966	0.320548
								316293	4715.1	1298.1	488.8	67.0808	2.65569	0.37655															234401	3296.5	1259.3	257	71.106	4.9	0.204082								11908.1	667.7	187	101.9	17.8345	1.83513	0.54492
								223998	2385.4	770.8	390.3	93.9039	1.97489	0.506357															604262	4772	1517	570.8	126.627	2.65767	0.376269								31851.3	1724.2	341.1	161.5	18.4731	2.11207	0.473468
								560417	5000.4	1389.8	560	112.074	2.48179	0.402936															347074	5267.1	1754.3	295.4	65.8948	5.93873	0.168386								9125	873.5	343.8	53.3	10.4465	6.45028	0.155032
								368817	3622	1395.2	348.9	101.827	3.99885	0.250072															8476.1	539.9	226.4	52.5	15.6994	4.31238	0.23189								20637.7	1044.6	250.8	132.1	19.7566	1.89856	0.526715
								26933.9	745.5	264.5	134.3	36.1286	1.96947	0.50775															7847.5	640.1	297.6	37.1	12.2598	8.02156	0.124664								134949	1979.6	621.4	307.1	68.1696	2.02345	0.494207
								13165.3	577.4	208.5	88.4	22.801	2.3586	0.423981															678945	5136.4	1809.8	501.2	132.183	3.61093	0.276937								28870.5	1328.8	459.3	87.7	21.7267	5.23717	0.190943
								373887	5004.1	1414.6	368.2	74.7161	3.84193	0.260286															367763	5202.8	1549.8	419	70.6855	3.69881	0.270357								253999	5273.3	1233.7	675.4	48.1671	1.82662	0.547459
								177045	2116.4	672.5	360.3	83.6539	1.8665	0.535762															185324	3239.5	715	461.8	57.2075	1.54829	0.645874								544499	5032	1203.1	722.1	108.207	1.66611	0.600199
								351322	3516.8	1070.6	471.5	99.8983	2.27063	0.440407															9723.2	609.4	254.9	53.3	15.9554	4.78236	0.209102								101820	2331.1	592.7	361.1	43.6789	1.64137	0.609246
								601768	6232	1536.3	563.8	96.561	2.7249	0.366986															102626	1498.5	384.2	363.9	68.4857	1.05578	0.947163								67808.9	1891.5	598.4	180.2	35.8493	3.32075	0.301136
								527602	4211.6	1333.2	536.7	125.274	2.48407	0.402565															141655	2357.2	948.2	199.7	60.0948	4.74812	0.21061								58202.3	2593.6	408.9	276.4	22.4407	1.47938	0.67596
								600775	4647.6	1229.7	671.9	129.266	1.83018	0.546393															223664	2855.3	1140.1	266.2	78.3329	4.28287	0.233488								87691.2	2083.8	532.4	249.8	42.0823	2.13131	0.469196
								486357	6430.8	1423.5	918	75.6294	1.55065	0.644889															59971.5	1616.5	479.3	173.5	37.0996	2.76254	0.361986								27435.8	735.8	279.3	127	37.287	2.19921	0.454708
								100512	4284	636.2	358.8	23.4621	1.77313	0.563974															647332	6781.3	2374	457.3	95.4585	5.19134	0.192628								13687.5	642.5	267.4	73.4	21.3035	3.64305	0.274495
								543211	4349.4	1761.6	411.2	124.893	4.28405	0.233424															63798.9	1947	862.3	102.2	32.7678	8.43738	0.11852								10889.2	599.2	198.9	79.7	18.1729	2.49561	0.400704
								48610.9	1155.6	371.4	179.3	42.0655	2.07139	0.482768															21813.8	1108.7	458.1	66.6	19.6751	6.87838	0.145383								513215	5026.9	1761.5	409.4	102.094	4.30264	0.232416
								653182	3907.5	1406.7	604.4	167.161	2.32743	0.429658															162689	3387.3	1061.8	242.8	48.029	4.37315	0.228668								103386	1845.7	583.4	266.5	56.0146	2.18912	0.456805
								26883.3	1098.1	421.1	91.9	24.4817	4.58215	0.218238															55358.3	1891	749.6	102.9	29.2746	7.28474	0.137273								337589	6475.6	1031	740.2	52.1325	1.39287	0.717944
								730983	11982.9	2272.4	904	61.0022	2.51372	0.397817															54253.2	1334.7	429.6	168.7	40.6482	2.54653	0.392691								59616.6	1481.8	584.1	135.1	40.2326	4.32346	0.231296
								251972	3188.4	1351.7	249.9	79.0276	5.40896	0.184878															478672	6127.5	2064.9	428.2	78.1186	4.82228	0.207371								49574.1	1373.8	430.8	212.1	36.0854	2.03112	0.49234
								606746	5124.7	1695.3	538.3	118.396	3.14936	0.317525															19608.6	1024	444.1	58.4	19.149	7.60445	0.131502								191899	3898.5	732	417.1	49.2237	1.75497	0.569809
								228201	2970.1	991.8	332.4	76.8328	2.98375	0.335148															114899	2875.2	791.3	230.7	39.9621	3.43	0.291546								86819.3	1763.5	514.6	247.9	49.2312	2.07584	0.481733
								457142	4520.2	978.4	638.4	101.133	1.53258	0.652494															207244	2835.8	1028.7	327.9	73.0813	3.13724	0.318752								23623.6	780.3	205.7	178.9	30.275	1.1498	0.869713
																													513925	5870.8	1970.5	456.8	87.5392	4.3137	0.231819								110570	2197.3	685.6	287	50.3207	2.38885	0.418611
												65.9971	3.45441	0.357574															694468	6007.3	2208.2	442.9	115.604	4.98578	0.200571								7796.8	536.3	183.8	67.7	14.5381	2.71492	0.368335
												37.8288	1.81958	0.157634															169872	2407.4	943.5	239.4	70.5624	3.9411	0.253736								75220.4	1288.7	382.5	258.7	58.3692	1.47855	0.67634
																													34218.7	1162.8	524.2	88.6	29.4278	5.91648	0.169019								206676	2456.1	612.5	467.4	84.1481	1.31044	0.763102
																													96076.1	2268.4	951.2	140.4	42.3541	6.77493	0.147603								305622	4160.5	1182.3	404.2	73.4579	2.92504	0.341876
																													254506	3884.9	1761.7	192.8	65.5117	9.13745	0.10944								146466	2551.4	610.3	358.1	57.4062	1.70427	0.586761
																													26558.8	1074.2	297.4	149.2	24.7243	1.9933	0.501681								21514.7	812.2	313.5	90.9	26.4894	3.44884	0.289952
																													578646	5182.2	1890.8	490.2	111.66	3.8572	0.259255								9708	909	207.6	110.9	10.6799	1.87196	0.5342
																													370414	5027.7	1694.2	426.2	73.6746	3.97513	0.251564								45645.3	1447	471.5	143.3	31.5448	3.2903	0.303924
																													217449	3134.1	1203.1	273.1	69.3815	4.40535	0.226997								583320	5609	1327.1	624.4	103.997	2.1254	0.4705
																													462866	8274.1	2511.7	441.2	55.9415	5.69288	0.175658								272599	4645.1	1153.2	400.9	58.6853	2.87653	0.347641
																													200877	2842	1267.8	216.4	70.6815	5.8586	0.170689								9941.2	565.2	222.4	60	17.5888	3.70667	0.269784
																													219588	3021.4	1245.2	232.2	72.6776	5.36262	0.186476								214843	2478.8	596.4	563.7	86.6722	1.05801	0.945171
																													174957	2461.4	806.9	304.6	71.0801	2.64905	0.377494								21702.3	1100.3	211.9	147.1	19.724	1.44052	0.694195
																													407999	5169.1	2117.3	257.9	78.9304	8.20977	0.121806								57614.2	1895.2	760.6	148.8	30.4001	5.11156	0.195635
																													196030	3868.9	1670.9	162.1	50.6682	10.3078	0.0970136								62693.8	1571	329.3	299.6	39.9069	1.09913	0.909809
																													174556	3600.2	1036.6	239	48.4851	4.33724	0.230561								312556	3961.8	1204	427.5	78.8925	2.81637	0.355066
																													370024	6804.2	2929.1	220	54.3817	13.3141	0.0751084								224237	3578.2	988	333.5	62.6675	2.96252	0.337551
																													237498	4168.4	1097.6	327.9	56.9759	3.34736	0.298743								183970	2520.7	622	397	72.9837	1.56675	0.638264
																													400151	4701.3	1548.6	390.3	85.1151	3.96772	0.252034								64574.6	1428.7	546.8	169.9	45.1982	3.21836	0.310717
																													23922.7	777	253	128.2	30.7885	1.97348	0.506719								12800.3	564	208.2	80.6	22.6956	2.58313	0.387128
																													604369	6873.7	2070.5	432.7	87.9248	4.78507	0.208983								429955	5186	1462.4	466.1	82.9068	3.13752	0.318723
																													224769	3217.2	1128.5	267.4	69.8648	4.22027	0.236952								214868	2603.1	702.5	446.2	82.5432	1.57441	0.63516
																													369208	4673.9	1607.3	310.2	78.9935	5.1815	0.192994								35876.4	829.9	279	166.6	43.2298	1.67467	0.597133
																													374338	4315.9	1646.3	317.7	86.7346	5.18193	0.192978								15553.1	650.4	247.2	92.7	23.9131	2.66667	0.375
																													363276	4932.2	1879.9	295.9	73.654	6.35316	0.157402								262511	2535.4	874.1	414.4	103.538	2.10931	0.474088
																													688501	5754.1	1929	469.7	119.654	4.10688	0.243494								222726	3094.1	679.2	529.2	71.9841	1.28345	0.779152
																													311051	6371.9	1893.8	712.3	48.816	2.65871	0.376122								48428.4	1109.5	355.2	193.4	43.6489	1.83661	0.544482
																													30796.9	955.5	345.5	116.2	32.2312	2.97332	0.336324								175925	4096.9	806.9	302.8	42.941	2.6648	0.375263
																													359773	6676.5	2637.3	204.7	53.8865	12.8837	0.0776173								19907.7	798.7	325.9	80.1	24.9251	4.06866	0.245781
																													387959	6410.9	2717.9	226.1	60.5156	12.0208	0.0831892								497860	4017.8	1201	598.9	123.914	2.00534	0.498668
																													325321	6119.8	2091	243.9	53.1588	8.57319	0.116643								233904	2547.5	922.2	333.2	91.8171	2.76771	0.36131
																													716393	7516.3	2787	350.1	95.312	7.96058	0.125619								51429.5	1463.1	284.3	250.9	35.151	1.13312	0.882518
																													974545	7968.8	2213.9	585.9	122.295	3.77863	0.264646								573394	5196.7	1025.2	736.8	110.338	1.39142	0.718689
																													242867	4821.4	1652.9	242.7	50.3727	6.81047	0.146833								51510.6	1014.7	326.7	209.6	50.7644	1.55868	0.641567
																													131106	2466.8	1003.7	193.4	53.1482	5.18976	0.192687								333843	3025.4	772.9	585.1	110.347	1.32097	0.757019
																																											68716.3	1772.4	350.1	328.1	38.7702	1.06705	0.937161
																																	52.8831	4.76753	0.291444								413033	8256.1	1330	530.2	50.0276	2.50849	0.398647
																																	29.4256	2.93395	0.17052								695168	5982.2	1138.9	854.7	116.206	1.33251	0.750461
																																											586433	6014.5	1642.1	593	97.5032	2.76914	0.361123
																																											22412	1061.1	293.9	119.9	21.1215	2.45121	0.407962
																																											25494.2	862.3	302	118.5	29.5653	2.54852	0.392384
																																											66952.1	1265.5	369.9	242.6	52.9056	1.52473	0.655853
																																											366784	4628	1270.8	480	79.2533	2.6475	0.377715
																																											50608.2	1252.4	371.1	192.4	40.409	1.92879	0.518459
																																											17165.1	836.6	314.9	90	20.5177	3.49889	0.285805
																																											32125.1	1501.1	535.9	113.5	21.401	4.72159	0.211793
																																											48058.3	1096.4	414.5	150.9	43.8328	2.74685	0.364053
																																											569876	5354.7	1053	887.6	106.425	1.18635	0.842925
																																											54912.2	1087.4	407.9	181.7	50.4986	2.24491	0.445452
																																											230163	4332.5	1222.4	372.3	53.1247	3.28337	0.304565
																																											457654	3964.1	1096.4	623.6	115.45	1.75818	0.568771
																																											28307.8	904.2	383.4	98.2	31.307	3.90428	0.256129
																																											60280.7	1657.2	678.5	116.6	36.375	5.81904	0.17185
																																											155140	2319.2	713.8	311.4	66.8938	2.29223	0.436257
																																											89328.7	1978.6	512.2	283.9	45.1474	1.80416	0.554276
																																											339166	3409.2	925.3	509.4	99.4855	1.81645	0.550524
																																											745994	4826.2	1459.5	699.6	154.572	2.08619	0.479342
																																											28231.7	834	308.2	125.7	33.851	2.45187	0.407852
																																											1.24883e+06	6292	2224.3	725.9	198.479	3.0642	0.32635
																																											475407	4306.9	1299.8	495.2	110.383	2.6248	0.380982
																																											1.03482e+06	5505.7	2086.8	651.5	187.954	3.20307	0.3122
																																											445006	4714.2	1268.3	551.8	94.3969	2.29848	0.435071
																																											36337.8	2173.8	458.6	157.1	16.7163	2.91916	0.342564
																																											53964.2	1285.3	460.2	171.2	41.9857	2.68808	0.372012
																																											285993	2805.4	845.6	459.6	101.944	1.83986	0.543519
																																											21773.3	929.3	343.4	91.6	23.4298	3.74891	0.266744
																																											869835	6489.2	2017.8	588.5	134.044	3.42872	0.291654
																																											969460	5281.2	1983.3	639	183.568	3.10376	0.32219
																																											347328	5547.2	2076.1	440.3	62.6132	4.71519	0.21208
																																											117251	1769.5	552.9	327.5	66.2623	1.68824	0.592331
																																											74100	1628.2	681.1	145.6	45.5104	4.67788	0.213772
																																											263003	2575.9	831.6	425.1	102.101	1.95625	0.511183
																																											25235.7	739.5	264.8	124.7	34.1254	2.1235	0.470921
																																											373537	6561.5	2200.2	420.6	56.9286	5.2311	0.191164
																																											210154	2832.2	1125.8	288.6	74.2016	3.9009	0.256351
																																											405363	2812.1	924.2	575.8	144.149	1.60507	0.623025
																																											12521.5	605.8	197.9	95.7	20.6694	2.06792	0.483578
																																											71996.2	1468.1	575.9	163.9	49.0404	3.51373	0.284598
																																											33037.6	888.2	305.9	141.8	37.1961	2.15726	0.46355
																																											19517.4	810.7	247	109.9	24.0748	2.2475	0.444939
																																											294626	6500.1	1620.2	437.7	45.3264	3.70162	0.270152
																																											63981.4	1327.7	371.9	251.8	48.1897	1.47697	0.677064
																																											80401.4	1610	512.7	222.4	49.9388	2.30531	0.433782
																																											284943	2994	822.5	511.8	95.1714	1.60707	0.622249
																																											10909.4	900.6	424.3	38.1	12.1135	11.1365	0.089795
																																											35607.8	955.4	245.9	208	37.27	1.18221	0.845872
																																											102347	1383.9	433.8	306	73.9555	1.41765	0.705394
																																											61842.1	1319.1	360.9	246.7	46.882	1.46291	0.683569
																																											112917	3448.8	1319.2	162.1	32.7409	8.13819	0.122878
																																											37326.3	920	322.4	155.6	40.5721	2.07198	0.48263
																																											563484	3522.3	1115.4	680.7	159.976	1.63861	0.610274
																																											38137.4	1054.3	407.9	127.6	36.1732	3.19671	0.312822
																																											36104.6	937.2	268.5	183.4	38.5239	1.46401	0.683054
																																											218042	3903.8	1519.1	199.3	55.8537	7.62218	0.131196
																																											885216	7375	1663.7	764.2	120.029	2.17705	0.459338
																																											20799.9	692.5	213.2	135.6	30.036	1.57227	0.636023
																																											26645	1171.5	509.1	73.9	22.7443	6.88904	0.145158
																																											33939.9	1030.1	338.2	173.9	32.9482	1.9448	0.514193
																																											228094	4119.1	881.6	494.5	55.3748	1.78281	0.560912
																																											340616	3367.5	1045.7	470.1	101.148	2.22442	0.449555
																																															60.4274	2.83291	0.558495
																																															36.4295	1.79495	0.191462
[truncated: 120 more columns]

## Sheet: 350 degree C
	Area	Perimetre	Lenght	Width	A/P	L/W	W/L	Area	Perimetre	Lenght	Width	A/P	L/W	W/L	Area	Perimetre	Lenght	Width	A/P	L/W	W/L	Area	Perimetre	Lenght	Width	A/P	L/W	W/L	Area	Perimetre	Lenght	Width	A/P	L/W	W/L	Area	Perimetre	Lenght	Width	A/P	L/W	W/L	Area	Perimetre	Lenght	Width	A/P	L/W	W/L
Graminoids
	Agropyron repens S&L	Agropyron repens S&L	Agropyron repens S&L	Agropyron repens S&L	Agropyron repens S&L	Agropyron repens S&L	Agropyron repens S&L	Agropyron cristatum S&L	Agropyron cristatum S&L	Agropyron cristatum S&L	Agropyron cristatum S&L	Agropyron cristatum S&L	Agropyron cristatum S&L	Agropyron cristatum S&L	Agropyron sp.	Agropyron sp.	Agropyron sp.	Agropyron sp.	Agropyron sp.	Agropyron sp.	Agropyron sp.	Agropyron cristatum I	Agropyron cristatum I	Agropyron cristatum I	Agropyron cristatum I	Agropyron cristatum I	Agropyron cristatum I	Agropyron cristatum I	Agropyron cristatum I	Bromus sp.	Bromus sp.	Bromus sp.	Bromus sp.	Bromus sp.	Bromus sp.	Festuca sp.	Festuca sp.	Festuca sp.	Festuca sp.	Festuca sp.	Festuca sp.	Festuca sp.	Agropyron repens I	Agropyron repens I	Agropyron repens I	Agropyron repens I	Agropyron repens I	Agropyron repens I	Agropyron repens I
	709098	5131.1	1415.7	713.6	138.196	1.98388	0.504062	855768	5205.6	1927.7	579	164.394	3.32936	0.300358	1.25457e+06	22025.5	4002	1467.4	56.9597	2.72727	0.366667	10716.8	478.5	150.9	97.5	22.3967	1.54769	0.646123	172533	2029.1	753.5	327.2	85.0295	2.30287	0.43424	229636	3320.7	1018.2	314.3	69.1528	3.23958	0.308682	135334	2645.5	842.3	260.1	51.1562	3.23837	0.308797
	178966	3679.7	1290.3	227.8	48.6362	5.66418	0.176548	108968	1981.8	744.2	195.2	54.9842	3.8125	0.262295	740422	8114.7	2213.7	517.2	91.2446	4.28016	0.233636	31744.9	834.1	284	152.7	38.0589	1.85986	0.537676	715445	6015.9	1363.6	710	118.926	1.92056	0.520681	275382	4354.6	1662.4	256.5	63.2394	6.48109	0.154295	294717	4082.5	1063.9	391	72.1903	2.72097	0.367516
	9287.2	655.7	304.5	43.4	14.1638	7.01613	0.142529	24713.5	677.4	199.9	163.6	36.4829	1.22188	0.818409	1.12888e+06	13847.6	4129.8	432.3	81.5216	9.55309	0.104678	10569.8	535.5	213.7	65.2	19.7382	3.27761	0.305101	10650.9	796.3	309	67.7	13.3755	4.56425	0.219094	16577.1	906.5	277.1	83.5	18.2869	3.31856	0.301335	249275	3280.5	846.1	393.1	75.9868	2.15238	0.464602
	19892.5	695.3	256.1	101.4	28.61	2.52564	0.395939	26097.5	1127.8	417.3	99.2	23.1402	4.20665	0.237719	8004.7	667.8	237.9	54.3	11.9867	4.38122	0.228247	138725	2065.7	681.8	276.9	67.1566	2.46226	0.406131	60584.9	1698.7	551.1	152.2	35.6655	3.62089	0.276175	108963	2017.2	735.9	204.7	54.0168	3.59502	0.278163	19238.5	693.5	172.1	150.3	27.7412	1.14504	0.873329
	20876	862.9	311.8	89.3	24.1928	3.4916	0.286402	58460.8	1238.9	314.2	257.4	47.1877	1.22067	0.819223	449153	4650.7	1454.6	444.5	96.5774	3.27244	0.305582	27309.1	905.7	307.4	125.7	30.1525	2.44551	0.408913	781673	4455.8	1182.1	863.4	175.428	1.36912	0.730395	149158	3035.3	1021.1	243.6	49.1412	4.19171	0.238566	144449	3105.7	1078.5	244.7	46.5108	4.40744	0.226889
	14153.9	659.9	197.5	101	21.4486	1.95545	0.511392	251120	2521.1	739.4	460	99.6073	1.60739	0.622126	934861	8019.6	2152.2	660.4	116.572	3.25893	0.306849	73385.3	2130.4	718	141.8	34.4467	5.06347	0.197493	164894	4325.5	891.9	403	38.1213	2.21315	0.451844	170389	3086	944.4	326.1	55.2135	2.89604	0.345299	283782	3115.6	1190.2	315.5	91.0843	3.77242	0.265081
	694711	8430.6	1517.2	816	82.4036	1.85931	0.537833	132799	2385.2	638.1	311.4	55.6763	2.04913	0.488011	15101.9	625.5	251.5	80.2	24.1437	3.13591	0.318887	204922	2429.3	750.7	392.4	84.3544	1.9131	0.522712	7720.8	480.7	192.2	55.5	16.0616	3.46306	0.288762	21981.1	978.2	389.1	75.9	22.471	5.12648	0.195066	10650.9	533.7	203.4	70.5	19.9567	2.88511	0.346608
	463443	5319.9	1244.7	697.8	87.1151	1.78375	0.560617	144104	2008.4	732.5	271.2	71.7506	2.70096	0.370239	239977	3914.4	1569.2	208.7	61.3063	7.51893	0.132998	49128	981.6	259.8	248.2	50.0489	1.04674	0.95535	162704	4822.6	711.3	467.5	33.7378	1.5215	0.657247	236287	3399.9	1354.6	233.6	69.4981	5.7988	0.172449	135516	3840	1438.4	292.4	35.2907	4.91929	0.203281
	359591	8486.1	1465.6	974.3	42.3741	1.50426	0.664779	30376.1	1367.7	361.6	145.5	22.2096	2.48522	0.402378	113246	2280.5	834.1	190.1	49.6585	4.38769	0.22791	15441.5	717	266.7	85.1	21.5363	3.13396	0.319085	1.00846e+06	5398.9	1517.9	886.8	186.791	1.71166	0.584228	664832	6227.2	2486.3	371.7	106.763	6.689	0.149499	582986	4603.3	1327.5	590.8	126.645	2.24695	0.445047
	8116.2	516.2	189.4	64.8	15.723	2.92284	0.342133	181425	2841.5	1175.8	209.5	63.8484	5.61241	0.178177	21641.5	1119.2	390.1	83.9	19.3366	4.64958	0.215073	436150	4295.2	928.7	697.8	101.543	1.3309	0.751373	17053.6	885.3	276.3	106.2	19.2631	2.60169	0.384365	15223.5	841.4	326.3	94.4	18.0931	3.45657	0.289304	970372	8744.3	2182	906.1	110.972	2.40812	0.415261
	294651	4093.3	1261.1	413.3	71.9838	3.05129	0.32773	55084.6	1843.4	780.9	105.9	29.8821	7.37394	0.135613	104882	3865	1099.6	200.4	27.1363	5.48703	0.182248	16876.2	997.9	396.4	72.5	16.9117	5.46759	0.182896	126082	1929.7	702.9	242	65.3377	2.90455	0.344288	537782	6053.2	2131.6	375.1	88.8425	5.68275	0.175971	464026	4361.3	1005.5	660	106.396	1.52348	0.65639
	10438	619.2	180.1	83.9	16.8572	2.1466	0.465852	400618	4373.3	1097.9	524.9	91.6054	2.09164	0.478095	38725.5	1309	402	143.6	29.584	2.79944	0.357214	293277	5431.1	2198.3	195.4	53.9996	11.2503	0.0888869	43617.5	1064.8	302.1	200.4	40.9631	1.50749	0.663357	705778	10064.4	2076.1	661.9	70.1262	3.13658	0.318819	235030	4798.9	909.1	748.9	48.9757	1.21391	0.823782
	57852.5	2236	797.7	124.3	25.8732	6.41754	0.155823	296943	4575	1801.8	315.4	64.9055	5.71275	0.175047	482976	6769.9	2429.7	312.1	71.3417	7.785	0.128452	20561.7	782.2	272.9	101.9	26.287	2.67812	0.373397	640372	5074.5	1057.7	834.2	126.194	1.26792	0.788692	15542.9	744.2	278.9	81.3	20.8854	3.4305	0.291502	194905	2526.1	601.5	464	77.1564	1.29634	0.771405
	23319.4	739.6	269.2	113.9	31.5297	2.36348	0.423105	19608.6	780.4	326.6	79.1	25.1263	4.12895	0.242192	96821.3	3041.8	486.5	407.7	31.8303	1.19328	0.838027	40687.3	1350.4	508.1	121.5	30.1298	4.18189	0.239126	10275.8	528.7	209.6	65.7	19.436	3.19026	0.313454	37965.1	1055	410.1	125	35.9859	3.2808	0.304804	499776	3912.3	1175.1	608.5	127.745	1.93114	0.517828
	894027	7905.7	1314.2	1158.5	113.086	1.1344	0.881525	17504.8	937.7	292.6	85.6	18.6678	3.41822	0.29255	10458.3	612.7	251.3	58.3	17.0692	4.31046	0.231994	186064	2812.7	626.2	440.3	66.1513	1.42221	0.70313	15882.6	959.8	292.9	103.1	16.5478	2.84093	0.351997	367641	4167.3	1455.4	342.8	88.2205	4.24562	0.235537	43176.4	1142.4	400.2	140.7	37.7945	2.84435	0.351574
	30746.2	1297.4	325.6	173	23.6983	1.88208	0.531327	15857.2	886.5	313.8	70.1	17.8874	4.47646	0.223391	10757.4	880.4	285.1	85	12.2188	3.35412	0.298141	29058	1452.5	658.2	61.3	20.0055	10.7374	0.0931328	26609.5	1269.9	571.3	67.1	20.954	8.51416	0.117451	442618	5775.3	2535.3	240.6	76.6398	10.5374	0.0949	145909	2629.8	723.2	309.3	55.4828	2.33818	0.427683
	7690.3	602.4	213	59.6	12.7661	3.57383	0.279812	76300.2	1324	432.1	242.2	57.6285	1.78406	0.560518	9773.9	525.6	188.2	71.1	18.5957	2.64698	0.37779	562130	5205.2	1105.3	806.3	107.994	1.37083	0.729485	390454	5121.3	1274.2	452.9	76.2411	2.81342	0.355439	490322	6207.6	1535.8	588.4	78.9873	2.61013	0.383123	248824	4139.4	700.9	559.4	60.111	1.25295	0.798117
	9484.9	705.3	258.3	72.4	13.448	3.56768	0.280294	21078.7	720.8	268.6	102.6	29.2435	2.61793	0.381981	14828.1	1074.5	505.3	43.8	13.8	11.5365	0.0866812	42720.2	1094.5	377.3	156.9	39.0317	2.40472	0.415849	13140	1005.7	295.1	96	13.0655	3.07396	0.325313	130462	2109.7	675.5	271.6	61.8392	2.48711	0.402073	8597.8	747	296.9	62.3	11.5098	4.76565	0.209835
	294469	3358.9	1033.1	394.8	87.6682	2.61677	0.382151	405844	5857.4	2355.1	245.7	69.2875	9.58527	0.104327	284107	6022	1916.3	593	47.1781	3.23153	0.309451	38553.1	1944.9	425	184.1	19.8227	2.30853	0.433176	14199.5	812.1	249.3	91.1	17.4849	2.73655	0.365423	9804.3	515.2	204.8	66.4	19.0301	3.08434	0.324219	104177	1726.8	398.8	368.3	60.3295	1.08281	0.923521
	221494	2423.5	717.9	408.9	91.3943	1.75569	0.569578	229560	2941.1	691.5	453.5	78.0523	1.52481	0.655821	14671	785.2	250.1	101.9	18.6844	2.45437	0.407437	21494.4	688.4	204.9	144.5	31.2237	1.41799	0.705222	20764.4	696	257.5	106	29.8339	2.42925	0.41165	636043	6433.7	2345.7	404	98.8611	5.80619	0.17223	299858	3549.9	766.4	564.5	84.4693	1.35766	0.736561
	36109.6	1695.6	613.5	100.2	21.2961	6.12275	0.163325	845973	9269.8	3738.1	337	91.2612	11.0923	0.0901528	10189.6	682.9	277.7	55.4	14.9211	5.01264	0.199496	146558	2417.7	952	206.2	60.6186	4.61688	0.216597	448605	6227.7	2015.4	301.6	72.0338	6.68236	0.149648	14326.2	540.3	182.8	101.9	26.5153	1.79392	0.55744	8126.3	496.8	203.6	54.8	16.3573	3.71533	0.269155
	35171.8	1412.4	391.2	173.4	24.9022	2.25606	0.443252	283047	3022.5	954	395	93.6467	2.41519	0.414046	40378.1	1713.3	545	146.3	23.5674	3.72522	0.26844	31557.3	1283.6	420.7	125.7	24.585	3.34686	0.298788	663580	11665.8	4468.2	408.9	56.8825	10.9274	0.0915134	19441.3	801.2	324.2	84.5	24.2652	3.83669	0.260642	162349	2623.7	872.6	265.6	61.8778	3.28539	0.304378
	8577.5	593.3	246.2	50.2	14.4573	4.90438	0.203899	322726	3320.5	999.6	454.5	97.1919	2.19934	0.454682	58942.4	1206.5	360.8	219.6	48.854	1.64299	0.608647	103188	3376.5	1311.1	228.6	30.5608	5.73535	0.174357	115234	3617.1	911.3	278.7	31.858	3.26982	0.305827	437782	4863.3	1099.4	649.5	90.0175	1.69269	0.590777	655428	4769.9	1605.7	529.9	137.409	3.03019	0.330012
	52032.8	1925	739.4	149.7	27.03	4.93921	0.202461	32221.4	948.5	377.8	115.8	33.9709	3.26252	0.306511	27131.7	1829	715.1	89	14.8342	8.03483	0.124458	246816	4062.9	1133.4	488.5	60.7487	2.32016	0.431004	371225	4289.5	1198.3	470.5	86.5428	2.54687	0.39264	8891.8	492.3	197.4	59.7	18.0618	3.30653	0.302432	34984.2	1181.5	404.3	125.2	29.61	3.22923	0.309671
	116339	1908.8	422.8	390.6	60.9486	1.08244	0.923841	18589.6	761.2	314.9	78	24.4214	4.03718	0.247698	194053	2239.8	570.5	456	86.6386	1.2511	0.799299	123122	2118.7	869.5	190.2	58.1119	4.5715	0.218746	14919.4	617.1	244.4	80.1	24.1766	3.05119	0.327741	680218	7780.8	2455.8	570.2	87.4226	4.30691	0.232185	150111	2915.9	841.9	337.3	51.4803	2.496	0.400641
	369806	3973.6	1403.3	347.1	93.0657	4.04293	0.247346	381344	3773	1288.3	418.2	101.072	3.08058	0.324614	801256	8579.9	1661.7	1159.1	93.3875	1.43361	0.697539	47429.7	1224.7	312.6	219	38.7276	1.4274	0.700576	14250.2	596.1	215.7	90.9	23.9057	2.37294	0.421419	154907	2026	748.1	268	76.4595	2.79142	0.358241	13682.4	664.2	219.8	87.2	20.5998	2.52064	0.396724
	72270	1655.8	627.5	166.3	43.6466	3.7733	0.26502	24059.6	700.9	251.2	127.8	34.3267	1.96557	0.508758	764761	6323.4	1862	566.1	120.941	3.28917	0.304028	453690	5661.7	1139.6	860.8	80.1331	1.32388	0.755353	58075.5	1562.8	538.7	181.7	37.1612	2.96478	0.337293	10067.9	606.8	231.4	57.8	16.5918	4.00346	0.249784	80051.6	1689.8	595.4	181.9	47.3734	3.27323	0.305509
	141422	2979.6	908.4	259.7	47.4635	3.49788	0.285887	118549	1894.1	712.4	218.8	62.5885	3.25594	0.307131	98768	3382.3	1288.8	157.9	29.2014	8.16213	0.122517	29722.1	1233.2	362.7	162	24.1016	2.23889	0.44665	402757	10677.7	1687.7	970.1	37.7195	1.73972	0.574806	295077	4456.9	1055.9	485.9	66.2068	2.17308	0.460176	970175	11019	2945.5	654.2	88.0456	4.50245	0.222102
	88375.6	2290.4	907.7	137.8	38.5852	6.58708	0.151812	953887	11247.6	3280.4	857.3	84.808	3.82643	0.26134	17053.6	747.3	318.8	70.9	22.8203	4.49647	0.222396	904642	7861.5	1815	830	115.072	2.18675	0.4573	41239.9	1253.8	444.7	126.2	32.8919	3.52377	0.283787	34598.9	1504.9	673.4	69.5	22.9908	9.68921	0.103208	9236.5	496.4	155	89.7	18.607	1.72798	0.57871
	238244	3664.4	1125.4	335.2	65.0157	3.3574	0.29785	105992	2207.6	846.5	261.1	48.0123	3.24205	0.308447	17748.1	1253.4	629.6	37.5	14.16	16.7893	0.0595616	72609.6	1365.6	383.8	280	53.1705	1.37071	0.729547	7954	543.7	177.7	68.7	14.6294	2.58661	0.386607	50283.8	1421.5	372.7	204.4	35.3738	1.82339	0.54843	39962.4	1257.5	451.8	121.4	31.7792	3.72158	0.268703
	948579	11283.6	2178.1	1242.7	84.067	1.75272	0.570543	55733.5	1326.4	474.2	155.3	42.0186	3.05344	0.327499	23228.2	980.4	390.3	81.4	23.6926	4.79484	0.208558	15208.3	721.9	259.3	109.4	21.067	2.3702	0.421905	31440.7	1479.6	661.4	67.1	21.2495	9.85693	0.101451	2.10882e+06	18746.2	5377.7	2112.2	112.493	2.54602	0.39277	295224	3976.2	1138	374.7	74.2478	3.0371	0.329262
	302098	4874	1846.7	258.1	61.9816	7.15498	0.139763	25605.8	932.8	222.7	173.2	27.4505	1.2858	0.777728	39288.2	1357.6	606.6	102.8	28.9395	5.90078	0.169469	533949	8303.9	2283.8	431.6	64.301	5.29147	0.188983	21499.5	877.3	358.4	80.9	24.5064	4.43016	0.225725	146552	2486.6	766.4	294.8	58.9369	2.59973	0.384656	63839.5	2370.8	411.4	243.2	26.9274	1.69161	0.591152
	145554	2229.5	485.3	398.7	65.2854	1.21721	0.821554	13287	583.5	222.1	81.5	22.7712	2.72515	0.366952	62354.1	2702.3	1058.8	146.6	23.0745	7.22237	0.138459	100740	1696	397	336.5	59.3986	1.17979	0.847607	278236	3963	1620.3	228.5	70.2085	7.09103	0.141023	157857	3168.4	867.3	360.4	49.8224	2.40649	0.415542	747185	7126.8	1662.3	661.7	104.842	2.51217	0.398063
	14341.5	688.5	238.7	82.5	20.8301	2.89333	0.345622	35476	868.5	275.4	168	40.8474	1.63929	0.610022	29458.5	984.3	416	97.6	29.9284	4.2623	0.234615	582560	6897.4	1966.9	736	84.4608	2.67242	0.374193	49873.2	1687.7	751	88.6	29.551	8.4763	0.117976	38512.6	898.4	324.6	157.8	42.868	2.05703	0.486137	23182.6	846.8	289.9	110.9	27.3767	2.61407	0.382546
	167489	2644.7	542.6	420.5	63.3302	1.29037	0.774972	196111	2016.3	658	398.1	97.263	1.65285	0.605015	1.09481e+06	13578.5	2695.9	1115.8	80.6284	2.41611	0.413888	43876	1196.8	440.9	137.6	36.6611	3.20422	0.312089	219694	8148.8	3437	421.1	26.9603	8.16196	0.12252	183230	2680	1058.4	230	68.3694	4.60174	0.217309	821716	6930.1	1975.2	641.4	118.572	3.07951	0.324727
	109743	3501.3	716	561.2	31.3436	1.27584	0.783799	19461.6	1058.2	432.2	59.5	18.3912	7.26387	0.137668	358714	6384.3	1598.7	527.6	56.1869	3.03014	0.330018	563945	5478.6	1761	484.7	102.936	3.63318	0.275241	99219.1	2287.4	828.9	202.1	43.3764	4.10143	0.243817	166972	2332	736.3	318.1	71.6004	2.31468	0.432025	36641.9	1144.7	344.4	154.2	32.01	2.23346	0.447735
	493627	4748.2	1795.3	368.5	103.961	4.87191	0.205258	137204	2328.8	1027.2	185	58.9164	5.55243	0.180101	363869	7680.5	1713	578.7	47.3757	2.96008	0.337828	75661.4	1418.9	481.4	208.3	53.324	2.31109	0.432696	224085	6641.8	1577	424.9	33.7385	3.71146	0.269436	600481	6808.4	2445.8	453.9	88.197	5.38841	0.185583	860072	11835.5	2207.2	634.7	72.6688	3.47755	0.287559
	21007.8	957.6	375.4	74.5	21.938	5.03893	0.198455	235187	5001.1	1335.1	775.4	47.027	1.72182	0.58078	19233.5	709.4	288.3	88.3	27.1123	3.26501	0.306278	25605.8	950.6	345.7	106.4	26.9365	3.24906	0.307781	173253	3061.8	1028.1	271.1	56.5854	3.79233	0.26369	423096	5761.1	1112.2	678.3	73.4401	1.63969	0.609872	59571	2257.3	816.2	169	26.3904	4.82959	0.207057
	419263	9863.8	2083.8	1189.2	42.5052	1.75227	0.570688	47242.1	2066.5	744.7	159.1	22.8609	4.6807	0.213643	313809	5521.3	1561.5	533.3	56.836	2.928	0.341531	17023.2	706.6	218	114.2	24.0917	1.90893	0.523853	212263	4065.9	1260.7	283.4	52.2056	4.44848	0.224796	31851.3	997.7	440.8	97	31.9247	4.54433	0.220054	23116.7	751.4	250.4	125.9	30.7648	1.98888	0.502796
	75119	1936.7	657.9	179.3	38.7871	3.66927	0.272534	108004	3359.5	1173.5	268.1	32.149	4.3771	0.228462	10838.5	467.4	155.3	92.5	23.1889	1.67892	0.595621	201475	2693.6	829.2	338.1	74.7976	2.45253	0.407742	606767	5143.4	1845.4	437.8	117.97	4.21517	0.237239	262186	3825.1	934.8	418.7	68.5437	2.23262	0.447903	39724.2	1127.3	365.8	158	35.2384	2.31519	0.43193
	7979.3	422.4	151.4	69.3	18.8904	2.1847	0.457728	348580	5869.3	2213.2	281.1	59.3904	7.87335	0.127011	8542	542.8	246.7	46.8	15.7369	5.27137	0.189704	217611	4377	1586.8	264.5	49.7169	5.99924	0.166688	30264.6	854.5	262.4	156.5	35.4179	1.67668	0.596418	703487	4141.9	1262	752.3	169.846	1.67752	0.596117	343845	4529.5	1186.8	495.1	75.9124	2.39709	0.417172
	251825	4550.6	1143.7	361.6	55.3388	3.16289	0.316167	337960	4199	1695.3	270.5	80.4857	6.26728	0.159559	7847.5	775.1	376.4	34.9	10.1245	10.7851	0.0927205	17261.5	737.6	286.9	80.3	23.4023	3.57285	0.279888	26452.4	772	261.2	144.3	34.2648	1.81012	0.55245	17864.7	818.5	310.3	87.8	21.8261	3.53417	0.282952	61193.2	2031.2	703.9	152.5	30.1266	4.61574	0.21665
	275676	4675.2	1026.5	641.7	58.9657	1.59966	0.625134	122001	1722.9	522.3	307.8	70.8115	1.69688	0.589316	224992	3212.9	1071.8	297.5	70.0277	3.60269	0.27757	15451.7	602.4	190.7	112.9	25.6502	1.68911	0.592029	32444.4	953.9	329.9	148.6	34.0124	2.22005	0.45044	388005	3107.7	1109.4	458.1	124.853	2.42174	0.412926	17109.4	666.4	258.8	92.9	25.6744	2.78579	0.358964
	28140.5	781.4	267.5	137.3	36.0129	1.94829	0.513271	1.15801e+06	8083.4	2928.9	699.2	143.258	4.18893	0.238724	71134.4	1765.8	396.7	265	40.2845	1.49698	0.668011	64817.9	1341	388.6	232.9	48.3355	1.66853	0.599331	100476	2142.8	562.3	303	46.8902	1.85578	0.538858	194920	2620.2	997	263.6	74.3913	3.78225	0.264393	1.18989e+06	12055.9	2643	1558.4	98.6981	1.69597	0.589633
	33108.5	978.3	397.1	114.2	33.8429	3.47723	0.287585	160473	2270.7	693.3	309.5	70.6712	2.24006	0.446416	27679.2	934.4	309.7	123.5	29.6224	2.50769	0.398773	104917	1545.6	417	337.1	67.8812	1.23702	0.808393	15010.6	701.2	265.3	75.6	21.407	3.50926	0.28496	586626	8303.6	2762	904	70.6472	3.05531	0.327299	17839.4	664.4	218.1	119.7	26.8504	1.82206	0.548831
	14017	583.4	219.1	83.9	24.0264	2.61144	0.38293	79098.5	3503.5	1214.9	136.5	22.577	8.90037	0.112355	120835	2307.5	794.4	228.3	52.3663	3.47963	0.287387	103579	1927.4	827.9	180.4	53.7402	4.58925	0.217901	144165	5732.9	2101.4	387.4	25.1469	5.42437	0.184353	8998.3	450.1	158.6	75	19.9918	2.11467	0.472888	14077.8	636	178.4	109	22.1349	1.6367	0.610987
	287057	4913.2	891.4	642.8	58.4257	1.38675	0.721113	137047	2123.5	628.8	309.7	64.5384	2.03035	0.492525	543145	7180.8	1490.1	705.4	75.6385	2.11242	0.473391	12506.3	657.6	218.4	84.7	19.0181	2.57851	0.387821	11614.1	471.8	172.4	88.8	24.6166	1.94144	0.515081	133661	2955.7	1336.2	173.5	45.2214	7.70144	0.129846	459459	7379.5	2150.6	557.4	62.2615	3.85827	0.259183
	465598	5276.5	1487.3	593.4	88.2399	2.5064	0.398978	9657.3	532.9	165.5	79.6	18.1222	2.07915	0.480967	33980.5	2545.6	950.9	217.4	13.3487	4.37397	0.228626	75783.1	3161.2	1078.2	110.7	23.9729	9.73984	0.102671	649284	10826.4	2294.4	968.1	59.9723	2.37	0.42194	14889	829.9	332.1	60.2	17.9407	5.51661	0.181271	132287	3503.6	1067.8	256.9	37.7575	4.15648	0.240588
	109186	3160.3	889.7	207.6	34.5492	4.28565	0.233337	919769	7836.9	2989.8	692.9	117.364	4.31491	0.231755	150218	2924.9	666.9	327.8	51.3582	2.03447	0.491528	53036.5	1768.1	624.7	177.3	29.9963	3.52341	0.283816	17403.4	710.4	236.8	102.6	24.498	2.30799	0.433277	136221	2015.3	777.9	234.2	67.5934	3.32152	0.301067	351262	5990.4	1136.6	701.3	58.6374	1.6207	0.617016
	52914.8	1552.6	581.4	143.6	34.0814	4.04875	0.24699	130036	2207.8	873.7	198.8	58.8986	4.39487	0.227538	556255	13225.2	2155.7	643.5	42.0602	3.34996	0.298511	419694	8503	2281.6	666.8	49.3584	3.42172	0.292251	56133.9	1300.5	474.2	157.1	43.1633	3.01846	0.331295	75139.3	1398.7	523.4	196.2	53.7208	2.66769	0.374857	33103.5	1433.2	589.2	89.3	23.0976	6.59798	0.151561
	176026	3576.4	1201.8	314	49.2189	3.82739	0.261275	372422	3783.4	997.8	514.1	98.4357	1.94087	0.515234	20992.6	902.4	224.5	151.8	23.2631	1.47892	0.676169	15811.6	691.2	235.6	97.2	22.8756	2.42387	0.412564	33199.8	1058.2	407.7	116.2	31.3738	3.50861	0.285013	155105	4053.4	821.2	472.2	38.2653	1.73909	0.575012	44261.3	1568.7	611.6	119.2	28.2153	5.13087	0.194899
	167064	3617.3	1571.6	142.3	46.1846	11.0443	0.0905447	13631.7	622.3	235.1	76.2	21.9054	3.0853	0.324117	447540	4985.4	1035.7	695.4	89.7702	1.48936	0.67143	485551	5215.4	1089	772.5	93.0995	1.40971	0.709366	161822	2396.4	980.8	215.5	67.527	4.55128	0.219719	10524.2	675.7	241.1	59.2	15.5753	4.07264	0.245541	420024	5614.5	1252.4	536.7	74.8105	2.33352	0.428537
	59520.3	2034	635.1	227.5	29.2627	2.79165	0.358211	285993	3399.5	1110.8	344.2	84.1278	3.22719	0.309867	395275	5994	1227.5	586.8	65.945	2.09185	0.478045	76573.9	1451.9	391.4	269.1	52.7405	1.45448	0.687532	23030.5	1189.1	550.1	57	19.368	9.65088	0.103618	63804	1658.1	687.9	123.4	38.4802	5.57455	0.179387	9637	446.7	152.8	85.6	21.5738	1.78505	0.560209
	232703	3166.5	868.2	407	73.4889	2.13317	0.468786	122954	2110.6	592.6	321.5	58.2556	1.84323	0.542524	54085.9	3571.5	836	410.5	15.1437	2.03654	0.491029	292116	4051.5	1056.5	432.4	72.1008	2.44334	0.409276	454557	6354.2	1849.3	508.3	71.5364	3.63821	0.274861	188081	3005.5	694.8	416.5	62.5791	1.66819	0.599453	239399	5345.5	1374.6	306.5	44.7852	4.48483	0.222974
	73978.4	2347.1	1024.4	149.4	31.5191	6.85676	0.145841	217286	3291.8	935.8	329.5	66.0084	2.84006	0.352105	937335	13683.5	4127.8	833.9	68.5011	4.94999	0.20202	307370	5434.1	1723.3	479.9	56.5633	3.59096	0.278477	7903.3	479	195.1	53	16.4996	3.68113	0.271656	20156.1	1158.3	224.7	205.6	17.4015	1.0929	0.914998	276107	3085.4	935	450.3	89.4883	2.07639	0.481604
	2.71899e+06	19593.4	5022.2	1465.1	138.77	3.42789	0.291725	86276.8	1427.3	496.7	239.6	60.4476	2.07304	0.482384	158658	2853.1	1035	256.3	55.6091	4.03824	0.247633	509651	8215.8	2451.7	444.3	62.0331	5.51812	0.181221	27912.4	1164.9	468.5	93.5	23.9612	5.0107	0.199573	72944.2	1308.2	350.1	281.5	55.7592	1.24369	0.804056	600683	6235.7	2153.8	585.4	96.3297	3.67919	0.271799
	333554	6442.6	1359.6	364.8	51.7732	3.72697	0.268314	31506.6	1074.1	472.5	88	29.333	5.36932	0.186243	20810.1	1198.1	470.1	70.7	17.3693	6.64922	0.150394	335100	4141.9	835	652.8	80.905	1.27911	0.781796	23785.8	917.6	395.7	80.4	25.9218	4.92164	0.203184	53361	1843.1	513.4	282.7	28.9518	1.81606	0.550643	688719	7645	1637.3	655.8	90.0875	2.49665	0.400537
	2.72722e+06	17781.1	3000.9	2132.4	153.377	1.40729	0.710587	113758	1767.5	410.2	365.8	64.3611	1.12138	0.89176	8638.3	778.9	358.7	39.1	11.0904	9.17391	0.109005	29919.9	790.6	236.4	168.8	37.8445	1.40047	0.714044	142902	5536.3	721.7	592.4	25.8119	1.21826	0.82084	226183	6336.3	2136	334.1	35.6964	6.3933	0.156414	13804.1	801	198.1	105.1	17.2336	1.88487	0.53054
	1.10776e+06	8528.2	2542.8	634.9	129.894	4.00504	0.249685	10230.1	608.9	167.4	116.8	16.801	1.43322	0.69773	124901	3292.2	1423.7	134.4	37.9384	10.593	0.0944019	228546	4614.1	2044.2	157.8	49.532	12.9544	0.077194	151708	2485.4	802.4	253.4	61.0397	3.16654	0.315803	525853	7617	3105.9	427.1	69.0368	7.27207	0.137512	256833	3520	1038.7	370.3	72.964	2.80502	0.356503
	80355.7	1444.9	516.5	203.6	55.6133	2.53684	0.394192	413160	4189.7	1317.7	419.6	98.6132	3.14037	0.318434	110448	2055.9	622.5	243.8	53.7224	2.55332	0.391647	66359	1744.9	624.9	151.6	38.0303	4.12203	0.242599	373106	6826.5	988.5	914.8	54.6555	1.08056	0.925443	200689	3345.4	1093.6	313.1	59.9896	3.49281	0.286302	7923.5	493.4	164.1	77.2	16.059	2.12565	0.470445
	57685.2	1398.3	433.2	190.9	41.2538	2.26925	0.440674	15431.4	819.9	186.7	116.5	18.8211	1.60258	0.623996	951915	6577.4	2687.1	483.7	144.725	5.5553	0.180008	43064.9	1591.2	698.4	82.8	27.0644	8.43478	0.118557	33995.7	1126.9	464.5	98	30.1675	4.7398	0.21098	82429.1	2081.9	660.1	214	39.5932	3.08458	0.324193	303046	3599.2	1165.2	364.7	84.1982	3.19495	0.312993
	47363.8	1256.2	440.4	148.1	37.704	2.97367	0.336285	9490	514.2	158.5	84.5	18.4559	1.87574	0.533123	22848	1844.1	468.7	129.4	12.3898	3.6221	0.276083	41027	1058.4	300.4	200.4	38.7632	1.499	0.667111	68969.8	2225.6	1116	96.6	30.9893	11.5528	0.0865591	206017	5062.6	1546.8	274.9	40.6939	5.62677	0.177722	690220	5812.9	1965.1	524.8	118.739	3.74447	0.26706
	33990.6	915.8	322.7	142.5	37.1157	2.26456	0.441587	97414.4	1700.5	529.6	245.6	57.2857	2.15635	0.463746	8790.4	472.5	184	64.3	18.604	2.86159	0.349457	567580	5628	1403.3	612.6	100.849	2.29073	0.436542	48859.3	1338.1	464.7	158.1	36.5139	2.93928	0.340219	20946.9	894.3	267.2	111.4	23.4227	2.39856	0.416916	11690.1	702.6	268.5	68.5	16.6383	3.91971	0.255121
	9140.2	472.5	184.3	64.9	19.3443	2.83975	0.352143	379002	3283.4	960.4	536.2	115.43	1.79112	0.558309	15000.5	1250.6	537.6	47.6	11.9946	11.2941	0.0885417	111355	2409.4	999.7	164.9	46.2171	6.06246	0.164949	63829.4	1588.7	703.5	119.5	40.1771	5.88703	0.169865	13621.6	672.7	269.2	69.3	20.2491	3.88456	0.257429	40129.7	1830.2	540	167.8	21.9264	3.21812	0.310741
	14326.2	1063.4	380.7	59.5	13.4721	6.39832	0.156291	179058	4345.2	1754.9	232.9	41.2082	7.53499	0.132714	10777.6	652.1	230.9	68.5	16.5275	3.3708	0.296665	301049	5156.2	1667.5	351.3	58.3858	4.74666	0.210675	339105	7505.8	2620.6	353.1	45.1791	7.42169	0.13474	49117.8	2126.8	971.4	136.2	23.0947	7.13216	0.14021	50035.4	1332.2	323.4	222	37.5585	1.45676	0.686456
	167084	2429.9	890.1	253.4	68.7616	3.51263	0.284687	128313	3348	1436.8	180.8	38.3252	7.9469	0.125835	27496.7	944.4	303.5	142.7	29.1155	2.12684	0.470181	162075	2760.1	1113.3	252.2	58.7208	4.41435	0.226534	1.17514e+06	15074.4	2918.6	1068	77.9558	2.73277	0.365929	58962.7	2402.5	1119.9	132.1	24.5422	8.47767	0.117957	18016.8	669	219.2	111.1	26.9309	1.973	0.506843
	523521	5967.4	1763.6	443.5	87.7302	3.97655	0.251474	12840.9	495.3	187.2	88.2	25.9255	2.12245	0.471154	26315.5	1889.4	852	160.7	13.928	5.3018	0.188615	34472.2	1622.3	722.7	99.5	21.249	7.26332	0.137678	8065.5	581.9	163.7	90.1	13.8606	1.81687	0.550397	37797.8	1134.6	419.7	141.6	33.3138	2.96398	0.337384	199315	3214.3	952.7	293.3	62.0089	3.24821	0.307862
	20946.9	1506.6	529	67.4	13.9034	7.84866	0.12741	9307.5	830.4	362.3	33.7	11.2085	10.7507	0.0930168	23628.7	714.5	253.6	132.4	33.0703	1.91541	0.522082	589404	4969.1	1804.4	460.7	118.614	3.91665	0.25532	188203	2451.2	949.4	256.9	76.78	3.6956	0.270592	12045	636.2	225.3	75.1	18.9327	3	0.333333	269659	2994.3	1103.2	344.5	90.0574	3.20232	0.312273
	543363	8112.1	2360.9	501.2	66.9818	4.71049	0.212292	30898.3	857.2	307.4	141	36.0456	2.18014	0.458686	863438	11289.3	3101.3	518	76.4828	5.98707	0.167027	259069	3829.9	1302	341.9	67.6438	3.80813	0.262596	244712	6302.1	1358	321.1	38.8302	4.22921	0.236451	123177	1713.7	458.5	364.5	71.878	1.25789	0.794984	425154	5805	1697.5	452.5	73.2393	3.75138	0.266568
	183706	4176.9	936.7	370.8	43.9815	2.52616	0.395858	105003	1724.6	432.5	348.2	60.8857	1.2421	0.805087	364011	4531.9	1415.7	432.1	80.322	3.27632	0.30522	62303.5	1485.5	521.1	186.7	41.9411	2.79111	0.358281	9692.8	560.8	247.9	52.9	17.2839	4.6862	0.213392	325854	4395.9	1764.9	275.4	74.1267	6.4085	0.156043	267195	5056.2	1215.4	489.1	52.845	2.48497	0.402419
	739718	4188.5	1381.9	716.3	176.607	1.92922	0.518344	13799	816.2	252.6	117.9	16.9064	2.14249	0.466746	10559.6	647.4	310.8	45.7	16.3108	6.80088	0.14704	31526.9	1064.8	367.1	116.1	29.6083	3.16193	0.316263	9905.7	566.9	227.6	58	17.4735	3.92414	0.254833	17738	663.3	246.2	96	26.742	2.56458	0.389927	15948.5	691.1	231.1	108.3	23.077	2.13389	0.468628
	995512	6382.6	1886.9	752.9	155.973	2.50618	0.399014	182682	2480.7	753.4	331	73.6415	2.27613	0.439342	383164	5920	2126.1	332	64.7236	6.40392	0.156154	32120	1213	541.1	110	26.4798	4.91909	0.20329	77765.3	2207	765.2	140.3	35.2357	5.45403	0.183351	63368	1376.1	402.3	211.3	46.049	1.90393	0.52523	1.90212e+06	14125.6	2502.2	1212.7	134.658	2.06333	0.484654
	535430	6455.7	2222.5	357.4	82.939	6.21852	0.16081	80376	2159.9	961.3	110.7	37.2128	8.68383	0.115157	61091.9	2199.1	561.1	247.1	27.7804	2.27074	0.440385	9515.3	471.8	176.9	71.2	20.1681	2.48455	0.402487	255054	5884.7	1548.8	357.2	43.3419	4.33595	0.23063	732083	7861.5	2460.2	797.9	93.1226	3.08334	0.324323	180736	3328.8	974.6	286.6	54.2946	3.40056	0.294069
	1.17794e+06	9212.6	2645.3	649.3	127.861	4.07408	0.245454	129078	1771.1	601	279.6	72.8802	2.1495	0.465225	48195.2	1398	588.4	112.5	34.4744	5.23022	0.191196	302874	4434.6	1781.3	232.6	68.2979	7.65821	0.130579	9586.3	549.6	215.6	65	17.4423	3.31692	0.301484	38248.9	1230.4	357.7	187	31.0866	1.91283	0.522784	104126	1891.1	690.9	197.7	55.0613	3.49469	0.286149
	648204	5289.1	1540.6	577.5	122.555	2.66771	0.374854	15603.7	699.2	271.7	75.2	22.3165	3.61303	0.276776	117160	2536.3	834.3	216.4	46.1932	3.85536	0.259379	271788	3511.6	1315.6	294.2	77.3972	4.47179	0.223624	269441	2999.4	1154.6	314.6	89.8316	3.67006	0.272475	51510.6	1485.9	629.6	115.1	34.6663	5.47003	0.182814	700987	4631.6	1061.8	872.2	151.349	1.21738	0.821435
	802503	6762.7	2234.4	512.8	118.666	4.35725	0.229502	317063	4065.4	1308.2	373.6	77.9907	3.50161	0.285583	164529	2270.8	725.6	325.5	72.4541	2.22919	0.448594	162293	3143.4	1291.7	172.2	51.6298	7.50116	0.133313	52661.4	1258	472.4	148.8	41.8612	3.17473	0.314987	69319.6	1342.1	513	184.4	51.6501	2.782	0.359454	16409.8	820	265.6	86.1	20.012	3.08479	0.324172
	32728.3	1897.2	931.7	58	17.2508	16.0638	0.0622518	49087.4	985.6	297.3	223.3	49.8046	1.33139	0.751093	139455	2094.4	642.9	295.4	66.5848	2.17637	0.45948	48697.1	1390.5	382.9	190.9	35.0213	2.00576	0.498564	10144	495.7	205.1	66.2	20.464	3.09819	0.322769	343419	4763.1	1926.2	288.1	72.1	6.68587	0.149569	29524.4	851.4	247.5	172.4	34.6775	1.43561	0.696566
	162258	2913	819.1	286.5	55.7012	2.85899	0.349774	15689.9	601	232.4	89.4	26.1063	2.59955	0.384682	214437	3043.9	797	404.6	70.4482	1.96985	0.507654	1.2536e+06	10355.6	3581.1	1116.9	121.055	3.20629	0.311887	537112	7588.9	2758.6	312.4	70.7761	8.83035	0.113246	10032.4	742.4	271	51	13.5135	5.31373	0.188192	46441.2	1145	320.5	204.9	40.56	1.56418	0.639314
	1170367	8916.8	2649.6	633.1	131.254	4.18512	0.238942	17418.6	821.6	245.9	121.4	21.2008	2.02554	0.493697	20784.7	791.6	324.5	86.2	26.2566	3.7645	0.265639	544058	4124.6	1214.2	606.4	131.906	2.00231	0.499423	350202	6586.7	1342.8	474.8	53.1681	2.82814	0.35359	333427	4093.8	1188.4	501.8	81.4469	2.36827	0.422248	901190	14701.9	2391.6	908.8	61.2975	2.6316	0.379997
	343429	7283.7	1592.9	1007.7	47.1504	1.58073	0.63262	19274	723.7	246.8	107.6	26.6326	2.29368	0.435981	41457.9	1472	455	124.6	28.1643	3.65169	0.273846	201150	3839.4	1222.5	261.6	52.3911	4.67317	0.213988	250121	5384.8	1312	317.5	46.4495	4.13228	0.241997	580319	9224.4	2727	502.3	62.9113	5.42903	0.184195	28677.8	749.2	255.5	145	38.2779	1.76207	0.567515
	544194	6212.4	2009.8	389.7	87.5981	5.1573	0.1939	397211	3910.3	1458.9	364.4	101.581	4.00357	0.249777	47191.4	2050.4	585.5	130.1	23.0157	4.50038	0.222203	734613	8465.4	2183.2	911.4	86.7783	2.39544	0.417461	88634.1	1776.7	687	173.5	49.8869	3.95965	0.252547	80609.2	1435.3	560.4	190.2	56.1619	2.94637	0.3394	926720	7637.7	1519.8	1030.8	121.335	1.47439	0.678247
	99883.2	1567.9	533.1	248.1	63.7051	2.14873	0.465391	362719	3050.3	940.3	527.5	118.912	1.78256	0.560991	34588.8	1398.4	623.1	84	24.7346	7.41786	0.13481	112861	2058.8	814.1	188.9	54.8188	4.30969	0.232035	70972.2	1713.9	493	229.6	41.4098	2.14721	0.46572	819004	10519	2889.8	926.1	77.8595	3.1204	0.320472	12181.9	503.7	170.2	92.3	24.1848	1.84399	0.542303
	49523.4	1605.5	517.1	217.8	30.8461	2.3742	0.421195	165913	3124.9	712.5	365.9	53.0938	1.94725	0.513544	73441	2543.2	938.9	124.2	28.8774	7.55958	0.132282	207031	3399.6	1195.6	268.7	60.8986	4.44957	0.224741	181222	3830.9	1429.8	179.2	47.3054	7.97879	0.125332	1.68835e+06	12260.3	2751.2	1088.7	137.709	2.52705	0.395718	18559.2	757.4	198.3	134.5	24.5038	1.47435	0.678265
	509839	5545.3	1597.8	704.8	91.9407	2.26703	0.441107	9733.3	466.2	169.4	74.7	20.8779	2.26774	0.440968	14437.8	1124.2	410.6	61.2	12.8427	6.70915	0.14905	506052	7715.1	2812.6	365.9	65.5924	7.6868	0.130093	7847.5	638.9	285.9	36.8	12.2828	7.76902	0.128716	38862.3	1319.6	439.9	147.5	29.4501	2.98237	0.335303	8886.7	524.1	217.2	55.6	16.9561	3.90647	0.255985
	203335	2603.4	866.7	308	78.1037	2.81396	0.355371	8055.3	459.8	178.7	58.5	17.5191	3.0547	0.327364	32926	1583.7	585	120.4	20.7906	4.8588	0.205812	25580.4	910.1	296.2	137.8	28.1072	2.14949	0.465226	1.35919e+06	23366.2	5226.9	1439	58.169	3.63231	0.275307	197298	3583	1102	310.9	55.0649	3.54455	0.282123	26503	874.1	306.3	114	30.3203	2.68684	0.372184
	673881	6579.5	1789.3	719.9	102.421	2.48548	0.402336	764751	6072.2	2507	414.1	125.943	6.05409	0.165178	180305	7261.4	2381.3	854	24.8306	2.78841	0.358628	400821	7565.2	1464.6	502.3	52.9822	2.91579	0.342961	86114.6	2485.5	777.5	195.2	34.6468	3.98309	0.251061	1.51604e+06	11911.2	2511.2	1664.8	127.278	1.50841	0.66295	424429	4253.7	1197.8	523.2	99.7788	2.28937	0.436801
	116886	2095.9	713.6	225.7	55.7689	3.16172	0.316284	57923.5	1565.3	482.1	198.1	37.0047	2.43362	0.410911	9348.1	674.6	279	48.2	13.8572	5.78838	0.17276	28257.1	1226.5	268.9	169.3	23.0388	1.5883	0.629602	15137.4	562.5	200.2	103.9	26.9109	1.92685	0.518981	26102.6	931.2	331.5	106.8	28.0311	3.10393	0.322172	321301	3892.4	1023.1	547.6	82.5458	1.86833	0.535236
	580436	5164.9	1538.4	545.4	112.381	2.82068	0.354524	51302.8	1561.8	694.2	102.3	32.8485	6.78592	0.147364	331445	4768.7	1336.3	408.2	69.5043	3.27364	0.30547	24744	1000.6	215	179.2	24.7292	1.19978	0.833488	11056.5	459.5	157.1	91.6	24.062	1.71507	0.583068	82429.1	1533.8	441.8	268.7	53.7418	1.64421	0.608194	1.10431e+06	6968.3	2015.4	728.4	158.476	2.76689	0.361417
	180721	2668.1	578.5	423	67.7338	1.36761	0.731201	20328.5	618.4	183.5	143.5	32.8727	1.27875	0.782016	86535.4	2186.8	616.1	318.1	39.5717	1.93681	0.516312	79656.2	2443.7	516.8	377.8	32.5966	1.36792	0.731037	377090	9574	2259.5	289.5	39.3869	7.80484	0.128126	148748	2640.5	724	291.1	56.3331	2.48712	0.402072	21844.2	921.3	212.8	147.9	23.7102	1.43881	0.695019
	200821	2610.1	904.7	304.4	76.9399	2.97208	0.336465	19106.7	879.6	393.9	64.5	21.722	6.10698	0.163747	104978	3162.9	886.7	341.9	33.1904	2.59345	0.385587	892612	7387.4	2700.9	447.8	120.829	6.03149	0.165797	13388.4	648.3	272.3	64.6	20.6516	4.21517	0.237238	73638.7	1235.2	436.2	219.3	59.6168	1.98906	0.502751	120242	2579.6	1002.1	181.9	46.6127	5.50907	0.181519
	201576	3664.1	857.4	337.3	55.0139	2.54195	0.393399	162795	2210	612.4	364.9	73.6629	1.67827	0.595852	16972.5	758.9	232.6	120.7	22.3646	1.92709	0.518917	10377.1	754.4	254.4	72.8	13.7554	3.49451	0.286164	9221.3	1279	324.5	178.4	7.20977	1.81895	0.549769	12141.3	697.3	230.3	71.2	17.4119	3.23455	0.309162	162567	2284.1	604	388.2	71.1733	1.5559	0.642715
	11036.2	628.5	250.9	60.5	17.5596	4.14711	0.241132	468477	6385.4	1000.8	761.1	73.3669	1.31494	0.760492	76913.6	1327.1	356.7	313.8	57.9561	1.13671	0.879731	296557	3710.3	1246.3	387.4	79.9281	3.21709	0.31084	64959.8	2057.4	899.7	117.9	31.5737	7.63104	0.131044	112349	2208.9	907.9	166	50.862	5.46928	0.18284	17378	1126.8	416.2	62	15.4224	6.7129	0.148967
	54461	1628.9	579.3	149.9	33.4342	3.86458	0.258761	86540.5	2284	1010	115	37.8899	8.78261	0.113861	118453	2477.3	665.3	258.4	47.8152	2.57469	0.388396	43931.8	2265.6	808.8	85	19.3908	9.51529	0.105094	295067	7148.3	3181.4	205.2	41.2779	15.5039	0.0644999	19015.5	846	203.4	143.8	22.477	1.41446	0.706981	9287.2	513.2	151.4	94.1	18.0966	1.60893	0.621532
	33062.9	1376	593.9	74.4	24.0283	7.98253	0.125274	251181	2939.9	1122	301.4	85.4385	3.72263	0.268627	358587	6175.9	1589.8	422.5	58.0623	3.76284	0.265757	103741	2429.3	1022	185.5	42.7041	5.50943	0.181507	13702.7	914.3	357.8	61.7	14.9871	5.79903	0.172443	205804	4746.2	1067	511	43.3619	2.08806	0.478913	291995	4872.9	1189.7	460.4	59.9222	2.58406	0.386988
	170896	2915.2	653.5	432.3	58.6224	1.51168	0.661515	251551	3042.7	887.5	402.6	82.6735	2.20442	0.453634	319213	4272.5	848.5	544.5	74.7133	1.55831	0.641721	263352	4614.7	1004.7	472.2	57.0682	2.1277	0.469991	58410.1	1913.6	635	265.9	30.5237	2.38812	0.41874	64371.8	1408.2	455.5	186.9	45.7121	2.43713	0.410318	89333.7	1976.3	714	176.7	45.2025	4.04075	0.247479
	11867.6	671.9	233.4	79.1	17.6627	2.9507	0.338903	13824.4	630.4	239	78.5	21.9296	3.04459	0.328452	177207	3772.8	968.3	337.5	46.9697	2.86904	0.348549	533483	5765.8	1765.7	532.6	92.5254	3.31525	0.301637	62891.5	2219.8	920.3	203.5	28.3321	4.52236	0.221124	161041	3743.3	976.4	284.2	43.0211	3.43561	0.291069	349366	4217.7	1059.6	509.3	82.8332	2.0805	0.480653
	355469	3432.6	1316.3	368.5	103.557	3.57205	0.279951	12126.1	508	168.2	94.9	23.8703	1.77239	0.564209	24617.2	923.5	412.1	79.9	26.6564	5.1577	0.193885	100948	2838.6	754	266.1	35.5625	2.83352	0.352918	2.49853e+06	30282.1	5696	2385.1	82.5083	2.38816	0.418732	778038	11618.4	3665.6	672.3	66.966	5.45233	0.183408	33250.5	1055.4	325	158.2	31.5051	2.05436	0.486769
	63809.1	3569.8	1798.5	174.1	17.8747	10.3303	0.0968029	79909.6	2298.1	786	146.8	34.772	5.35422	0.186768	12977.8	1031.1	505.4	58.3	12.5864	8.66895	0.115354	487883	5257.4	1166.5	759	92.7993	1.53689	0.650664	33204.9	878.1	333.2	137.8	37.8145	2.418	0.413565	15588.5	739	218.8	107.8	21.094	2.02968	0.492687	277501	5008	1385.6	361.3	55.4116	3.83504	0.260753
	16323.6	603.3	197.2	115.9	27.0572	1.70147	0.587728	73385.3	1890.9	730.8	140.3	38.8097	5.20884	0.191981	557598	7094.5	2561.9	304.9	78.5958	8.40243	0.119013	406823	4271	1435.2	392.8	95.2524	3.65377	0.27369	59287.1	1348.3	548.8	141.3	43.9717	3.88393	0.257471	13368.1	624.8	230.1	79.8	21.3958	2.88346	0.346806	574966	6195	1852.4	524.7	92.8113	3.5304	0.283254
	46598.3	1064.8	384.4	160.1	43.7625	2.401	0.416493	402529	6366.9	2385	461	63.2221	5.17354	0.193291	68346.2	1883	456.7	276.6	36.2964	1.65112	0.605649	604972	5933.5	1394.2	654.7	101.959	2.12952	0.469588	68285.4	2254	583.4	268.9	30.2952	2.16958	0.460919	7700.5	543.7	249.6	43.3	14.1631	5.76443	0.173478	538603	6066.4	1514.3	518.2	88.7846	2.92223	0.342204
	210057	2683.7	801.5	351.8	78.2716	2.27828	0.438927	626902	4328.2	1338.5	630.3	144.841	2.12359	0.4709	24809.9	1168.8	517.9	63.5	21.2268	8.15591	0.122611	181648	3338	810.6	492.1	54.4183	1.64723	0.607081	116998	2030.7	772.4	207.6	57.6145	3.72062	0.268773	14676	913.7	397.4	50.4	16.0622	7.88492	0.126824	9571.1	485.2	188.5	66.6	19.7261	2.83033	0.353316
	369877	6380.8	1716.3	417.2	57.9671	4.11385	0.243081	282986	3781.9	1251.3	374.9	74.8265	3.33769	0.299608	62328.8	2738.1	1259.6	232.5	22.7635	5.41763	0.184582	44798.7	1224.6	451	137.9	36.5823	3.27049	0.305765	196532	2671.3	947.8	272.5	73.5717	3.47817	0.287508	309261	5219.7	1626.7	577	59.2489	2.81924	0.354706	572999	8919.3	2835	601.4	64.2426	4.714	0.212134
	39952.3	1277.5	383.5	164.9	31.2738	2.32565	0.429987	220166	2344.8	747.3	398.3	93.8954	1.87622	0.532985	27897.1	1752.5	839.1	134.2	15.9185	6.25261	0.159933	39866.1	1348.1	507.2	111.8	29.5721	4.53667	0.220426	18660.6	1004.3	422.7	65.3	18.5807	6.4732	0.154483	38532.8	1653.9	336.8	209.3	23.2981	1.60917	0.621437	319907	4331	1631.3	303.7	73.8645	5.37142	0.186171
	106337	2067.4	841	170.1	51.4349	4.94415	0.202259	159196	2981.3	845.4	277.5	53.3981	3.04649	0.328247	184573	2821.9	1102.4	225.7	65.4075	4.88436	0.204735	13018.3	572.5	189.9	102.8	22.7394	1.84728	0.541338	10595.1	636.7	258.4	56.6	16.6406	4.56537	0.21904	17048.5	1282.7	529	78.2	13.2911	6.76471	0.147826	21920.3	831.6	281.1	119.3	26.3592	2.35624	0.424404
	57811.9	1805.5	631.3	143.8	32.0199	4.39013	0.227784	400030	3987.6	1432.3	391.3	100.318	3.66036	0.273197	123725	2213.7	885.3	191.2	55.8905	4.63023	0.215972	594691	6592.7	2058.6	485.1	90.2045	4.24366	0.235646	10762.4	526.8	209.4	69.6	20.4298	3.00862	0.332378	20668.1	1035.7	226.3	188.4	19.9557	1.20117	0.832523	24003.8	853.8	228	157.8	28.1141	1.44487	0.692105
	258613	3401.3	1114.2	314.2	76.0335	3.54615	0.281996	752751	4588.4	1314.5	782.9	164.055	1.67901	0.595588	150988	3077.9	761.3	367.3	49.0556	2.07269	0.482464	876512	8429.2	3067.3	401.6	103.985	7.6377	0.130929	65380.6	1476.3	611	141.3	44.2868	4.32413	0.23126	8298.7	442.9	182.9	58.9	18.7372	3.10526	0.322034	12039.9	524.1	151.4	112.4	22.9725	1.34698	0.742404
	14529	557	158	127.6	26.0844	1.23824	0.807595	36261.7	912.7	255.9	194.7	39.7301	1.31433	0.760844	28125.3	916.4	300	127.7	30.6911	2.34926	0.425667	21935.5	851.8	310.9	96.1	25.7519	3.23517	0.309103	174414	3957.9	1111.1	332.1	44.0674	3.34568	0.298893	33868.9	915.7	329.4	133.2	36.9869	2.47297	0.404372	253852	2963.9	843.2	407.2	85.6481	2.07073	0.482922
	82550.8	1842	640.2	191.5	44.8159	3.34308	0.299125	16840.7	644.2	171.6	132.9	26.142	1.2912	0.774476	467616	7208.4	2054.6	540.9	64.8709	3.79848	0.263263	56904.5	1297.9	421.1	188.2	43.8435	2.23751	0.446925	302549	4567.3	2060.9	214.6	66.2425	9.60345	0.104129	246091	2463.2	778	428.8	99.907	1.81437	0.551157	1.05588e+06	8730.6	1784.7	1060.8	120.941	1.68241	0.594386
	11183.2	672.2	282.5	53.5	16.6367	5.28037	0.189381	1.164e+06	10327.7	3066.9	840.9	112.707	3.64716	0.274186	450466	3881.3	1182.3	507.8	116.06	2.32828	0.429502	31689.1	963.7	261	187.2	32.8827	1.39423	0.717241	228242	3259.1	1477	204.9	70.0321	7.20839	0.138727	184087	3015.1	1176.5	215.8	61.0549	5.45181	0.183425	210950	4013.9	771.8	549.7	52.5548	1.40404	0.712231
	38837	1002.5	356.8	146.3	38.7401	2.43882	0.410034	468629	4153.6	1626.2	377.1	112.825	4.31238	0.23189	47622.3	1577.8	433.5	196.8	30.1827	2.20274	0.453979	213733	2990.5	959.5	307.4	71.4706	3.12134	0.320375	69679.5	2214.1	852.3	129.5	31.4708	6.58147	0.151942	15887.6	986.4	355.3	75.9	16.1067	4.68116	0.213622	113089	3496	571.2	455.8	32.3481	1.25318	0.797969
	457978	9028.8	1379.9	652.3	50.7242	2.11544	0.472715	8349.4	523.4	223.5	49	15.9522	4.56122	0.219239	94185.2	1674	465.1	309.3	56.2636	1.50372	0.665018	264828	3384.1	1359.9	265.6	78.2565	5.12011	0.195308	494321	7821.4	2169.6	437.1	63.2011	4.96362	0.201466	97084.9	2077.3	454.2	316.5	46.7361	1.43507	0.69683	14650.7	573	162.6	122.4	25.5684	1.32843	0.752768
	147206	2881	1016.1	256.3	51.0956	3.96449	0.252239	195893	4046.2	813.1	723.9	48.4142	1.12322	0.890296	274074	5670.3	1683.2	354.1	48.3351	4.75346	0.210373	137564	2022.9	495.1	429.2	68.0036	1.15354	0.866896	14660.8	670.3	255.8	75.4	21.872	3.39257	0.294762	84847.3	1595.3	543.6	236.5	53.1858	2.29852	0.435063	47409.4	1622.9	596	188.8	29.2128	3.15678	0.316779
	427364	5883.8	1023.3	740.7	72.634	1.38153	0.723835	173912	3018.9	1345.6	182.8	57.6078	7.36105	0.13585	39024.6	1209.5	370.4	165.1	32.2651	2.24349	0.445734	340930	3867.6	1433.5	330.2	88.1503	4.34131	0.230345	31785.4	1395.7	625.5	67.1	22.7738	9.32191	0.107274	252240	4359.7	1348.9	249.2	57.8573	5.41292	0.184743	105830	1744.4	467.1	328.7	60.6683	1.42105	0.703704
	156068	3140.7	968.5	232.1	49.6921	4.17277	0.239649	366247	4205.1	1891.6	262.3	87.0959	7.21159	0.138666	28510.5	1151.7	358.8	151.2	24.7551	2.37302	0.421405	167140	3367.2	775.7	516.4	49.6375	1.50213	0.665721	54354.6	1280.2	479.4	161.6	42.4579	2.96658	0.337088	200071	2730.1	911	343.3	73.2832	2.65366	0.376839	2.37409e+06	19388	5135.9	1057	122.451	4.85894	0.205806
	363976	5236.5	1526.4	349.6	69.5075	4.36613	0.229036	10965.2	761.3	344.8	44.9	14.4033	7.67929	0.13022	194292	6891.7	2110.3	606.8	28.1921	3.47775	0.287542	111852	2375.6	746.6	233.3	47.0838	3.20017	0.312483	86145	1843	702.5	201.4	46.7417	3.48808	0.28669	25169.8	949.1	349.6	96.3	26.5197	3.63032	0.275458	15203.3	605.1	162.3	134.8	25.1253	1.20401	0.830561
	21438.7	679.3	200.3	143.8	31.56	1.39291	0.717923	31192.3	869.4	329.4	125.5	35.878	2.6247	0.380996	30938.8	1382.9	626.1	78.4	22.3724	7.98597	0.12522	101064	2267.9	940.3	217.5	44.563	4.32322	0.231309	1.32371e+06	22548.3	5354.1	1515.9	58.7054	3.53196	0.283129	100512	2761.8	722.6	253.3	36.3936	2.85274	0.35054	21834.1	1021.6	359	96.7	21.3725	3.71251	0.269359
	34193.4	1430.2	568.8	91.5	23.9081	6.21639	0.160865	1.35781e+06	10099.3	3575.4	837.7	134.446	4.26812	0.234295	60797.8	2339.9	754.5	135.6	25.9831	5.56416	0.179722	161305	2390.1	753.3	289.9	67.4886	2.59848	0.38484	749842	5125.8	1565	638.7	146.288	2.45029	0.408115	268123	5370.9	1356.8	478.4	49.9214	2.83612	0.352594	812748	8952.8	2038	599.5	90.7815	3.3995	0.294161
	42253.8	1169.7	365.7	168.2	36.1236	2.1742	0.45994	348768	4361.5	1589	330.2	79.965	4.81224	0.207804	146618	2550	740.1	321.6	57.4974	2.30131	0.434536	19877.3	609.4	188.5	139.9	32.6178	1.34739	0.742175	24186.3	804.3	297.4	111.5	30.0712	2.66726	0.374916	9287.2	485.3	158.7	79.8	19.137	1.98872	0.502836	12121	509.4	185.7	85.7	23.7947	2.16686	0.461497
	96131.8	3469.8	1359.1	135	27.7053	10.0674	0.0993304	266191	4197.5	1651.8	264	63.4167	6.25682	0.159826	44489.4	2138.3	778.8	105	20.806	7.41714	0.134823	44124.4	1253.5	489.8	120.6	35.201	4.06136	0.246223	20064.9	1035.8	343.9	97.9	19.3714	3.51277	0.284676	9064.2	420.7	153	79.3	21.5455	1.92938	0.518301	31506.6	1015.8	298.3	149.8	31.0165	1.99132	0.502179
	182966	5193.7	1372.7	297.8	35.2285	4.60947	0.216945	941041	10355.9	3365.7	479.8	90.87	7.0148	0.142556	47470.3	2464.7	868.9	155.5	19.2601	5.58778	0.178962	11979.1	560.4	206.6	76.5	21.376	2.70065	0.370281	552564	11980.1	2517.6	1103.2	46.1235	2.28209	0.438195	15259	784.2	315.1	65	19.458	4.84769	0.206284	102854	2520.4	751.9	287.2	40.8086	2.61804	0.381966
	277679	5151.4	1211.5	373.1	53.9035	3.24712	0.307965	28191.2	1530.2	301.2	190.2	18.4232	1.5836	0.631474	31648.5	1649	562	119.1	19.1925	4.71872	0.211922	158775	6609.4	2371.6	199.2	24.0226	11.9056	0.0839939	147794	2894.7	1114	196.3	51.0569	5.67499	0.176212	129494	1716.9	595.7	310.6	75.423	1.9179	0.521403	30097.3	1158.8	394.5	106.5	25.9728	3.70423	0.269962
	269096	3174.5	1017.6	361	84.7681	2.81884	0.354756	163059	2360.5	864.5	254.4	69.078	3.39819	0.294274	92005.3	2220.2	476.4	287.9	41.4401	1.65474	0.604324	274825	4199.8	1460.5	300.4	65.4375	4.86185	0.205683	39338.9	1014.4	399.1	130.2	38.7805	3.06528	0.326234	117854	2849.4	949.3	268.1	41.3611	3.54084	0.282419	21884.8	894.7	365	84.2	24.4605	4.33492	0.230685
	74378.9	1341.4	386.4	274.1	55.4487	1.4097	0.709369	432520	5390.3	1547.6	575.6	80.2404	2.68867	0.371931	10356.9	524.5	231.5	58.8	19.7462	3.93707	0.253996	152352	2271.8	735.2	276.1	67.0622	2.6628	0.375544	454445	5750.4	1820.6	410	79.0284	4.44049	0.2252	87392.1	1601.4	379	332.8	54.5723	1.13882	0.8781	20764.4	683.8	213.9	132.9	30.3662	1.60948	0.621318
	657121	10549.8	3837.6	863	62.2876	4.44681	0.22488	164706	2917.7	882.6	276.7	56.4507	3.18974	0.313506	19380.5	836.6	333.3	79.4	23.1658	4.19773	0.238224	11811.8	536.9	211.8	75.2	22	2.81649	0.355052	173598	3968.8	1419	288.2	43.7407	4.92366	0.203101	481516	8693.9	1329.5	1194.9	55.3855	1.11265	0.898759	626228	8645.3	1486.6	972.9	72.4357	1.52801	0.654446
	120303	2185.4	726.1	219.7	55.0485	3.30496	0.302575	29392.6	1318.2	504.6	99.5	22.2975	5.07136	0.197186	9140.2	605.4	274.4	45.2	15.0978	6.0708	0.164723	106869	3547.6	1569.3	94	30.1243	16.6947	0.0598993	10402.5	699.8	311.1	46.7	14.865	6.66167	0.150113	112983	2480.4	756.3	310.9	45.5502	2.43261	0.41108	10427.8	561	184.6	80.7	18.5879	2.28748	0.437161
	258060	3075.5	741.4	566.9	83.9083	1.30781	0.764634	178556	2179.7	630.6	373	81.9176	1.69062	0.5915	74911.2	2434.6	1031.5	113.8	30.7694	9.06415	0.110325	398985	5194.8	1445.8	433.8	76.8048	3.33287	0.300041	14204.6	767.6	204.8	114.7	18.5052	1.78553	0.560059	10321.4	486.8	181.7	73.3	21.2025	2.47885	0.403412	13717.9	572	177	104.7	23.9823	1.69054	0.591525
	234812	2866	909.2	345.4	81.93	2.63231	0.379894	17874.9	648.4	187.7	135.2	27.5677	1.38831	0.720298	11284.6	485.3	196.3	74.6	23.2528	2.63137	0.380031	19502.1	801.3	326.2	79.4	24.3381	4.10831	0.243409	231192	5017.8	2074.2	172.4	46.0744	12.0313	0.0831164	35176.9	1794.5	488.7	143.8	19.6026	3.39847	0.29425	22842.9	870.9	341	89	26.2291	3.83146	0.260997
	22442.4	731.4	270.8	110	30.6842	2.46182	0.406204	307817	2713.9	727.3	559.2	113.422	1.30061	0.768871	204978	2729.6	904.3	306.2	75.0944	2.9533	0.338604	228368	3844.5	1124.6	461.5	59.4013	2.43684	0.410368	124734	4936	2032.5	272.6	25.2702	7.45598	0.134121	133002	2243.9	761.4	237.6	59.2727	3.20455	0.312057	309768	5705.5	1424	406.5	54.2929	3.50308	0.285463
	8253.1	565.5	208.7	59.2	14.5943	3.52534	0.283661	523232	4078.5	1136	621.8	128.29	1.82695	0.547359	8521.7	671.5	284.3	44.5	12.6905	6.38876	0.156525	266643	3651.8	1027.8	344.3	73.0168	2.98519	0.334987	24845.3	790.1	279.6	116.8	31.4458	2.39384	0.41774	366607	3977.3	1312.3	379.9	92.1748	3.45433	0.289492	49198.9	1437.1	440.2	154.4	34.2348	2.85104	0.35075
	307700	3262.5	948.1	431.7	94.3142	2.1962	0.455332	15603.7	572.1	207.5	97.6	27.2744	2.12602	0.470361	44514.8	2912	954	126.5	15.2867	7.5415	0.1326	18508.5	620.1	179.8	136.1	29.8476	1.32109	0.756952	425818	9044.7	3835.2	603.5	47.0793	6.35493	0.157358	135339	3417	784.5	335.1	39.6075	2.34109	0.427151	40900.3	1425.2	406.7	150	28.6979	2.71133	0.368822
	477572	6243	1940.2	409.5	76.4972	4.73797	0.211061	20967.2	655.5	206.2	134.4	31.9866	1.53423	0.651794	13996.7	933.4	413.5	90.8	14.9954	4.55396	0.219589	637001	6539.5	1856.8	642.5	97.4082	2.88996	0.346025	394945	4703.7	1715.3	316.6	83.9648	5.41788	0.184574	9652.2	541.4	229.9	55.6	17.8282	4.13489	0.241844	95842.9	2999.9	834.2	259.2	31.9487	3.21836	0.310717
	26168.5	1842.6	442.5	126.1	14.2019	3.50912	0.284972	166323	1903.7	564.1	392.4	87.3684	1.43756	0.695621	17646.7	871.3	381.3	61.3	20.2533	6.22023	0.160766	54182.2	1148	285.7	254.1	47.197	1.12436	0.889394	132759	2334.9	960	192.7	56.8584	4.98184	0.200729	394600	3997.5	1355.7	390.6	98.7118	3.47081	0.288117	278586	5332.2	973.3	723	52.246	1.3462	0.742834
	10585	767.3	368.4	41.6	13.7951	8.85577	0.112921	80741	1686.3	589.9	191.8	47.8806	3.0756	0.32514	25768	1826.2	766.3	88.1	14.1102	8.69807	0.114968	24546.2	778.8	250.6	144.1	31.518	1.73907	0.57502	32708	984.1	344	136.6	33.2365	2.5183	0.397093	44200.5	938	287	208.1	47.1221	1.37914	0.725087	18077.6	794	290.1	100	22.7678	2.901	0.344709
	32038.9	1129.1	300.8	150	28.3756	2.00533	0.49867	624535	3989.3	1249.4	701.2	156.553	1.7818	0.561229	137042	3894.3	803.9	458.1	35.1905	1.75486	0.569847	72346	3007.8	1143.5	126.7	24.0528	9.02526	0.1108	16962.4	1064.8	279.9	107.4	15.9301	2.60615	0.383708	13915.6	576.7	170.8	113.6	24.1297	1.50352	0.665105	13302.2	688.8	253.4	71.7	19.3121	3.53417	0.282952
	12734.4	899.4	271.8	122.9	14.1588	2.21155	0.452171	133803	2153.1	697.2	274	62.1443	2.54453	0.393001	525772	7074.6	1801.2	592	74.3183	3.04257	0.32867	73248.4	1438.5	476.2	216.8	50.92	2.19649	0.455271	121378	5171.9	1962.2	109.5	23.4687	17.9196	0.0558047	254907	2929.8	1148.4	293.1	87.0048	3.91812	0.255225	22234.6	996.3	246.3	171.6	22.3172	1.43531	0.696711
	273958	5523.4	1867.1	268	49.5995	6.96679	0.143538	943378	5899.2	2558.1	496.7	159.916	5.15019	0.194168	8978	659.8	201.8	72.2	13.6072	2.79501	0.35778	173780	3192.2	1027.6	276.2	54.4391	3.72049	0.268782	10209.9	495.3	187.4	74.6	20.6136	2.51206	0.398079	255409	2478.3	975	351.3	103.058	2.77541	0.360308	747576	8613.5	1988.6	765.3	86.7911	2.59846	0.384844
	543074	5640.8	1397.3	553.6	96.2761	2.52402	0.396193	259388	5853.1	2670.9	437.8	44.3164	6.10073	0.163915	51475.1	2035.4	400.8	235.7	25.2899	1.70047	0.588074	137782	1866.9	687	262.4	73.8028	2.61814	0.381951	178095	5724.2	1575.7	549.2	31.1126	2.86908	0.348544	42111.9	1285	410.6	175.3	32.7719	2.34227	0.426936	13261.7	710.5	201.7	103	18.6653	1.95825	0.510659
	8080.7	518.4	207	55.2	15.5878	3.75	0.266667	10412.6	560.8	214.3	66.2	18.5674	3.23716	0.308913	50719.8	1600.6	659.6	102.6	31.688	6.42885	0.155549	8116.2	525.5	153.2	77.1	15.4447	1.98703	0.503264	12019.6	723.3	321.9	49.2	16.6177	6.54268	0.152842	282150	4611.8	994.9	519.2	61.18	1.91622	0.521861	15451.7	710.3	271.8	75.6	21.7538	3.59524	0.278146
	73770.5	2341.7	593.2	241.1	31.503	2.46039	0.40644	452519	4355.4	1105.4	610.7	103.898	1.81005	0.55247	48519.6	1302.9	482.4	179.4	37.2397	2.68896	0.371891	105668	2537.1	836	218.4	41.6489	3.82784	0.261244	16328.7	824.3	281.9	98.1	19.8092	2.8736	0.347996	439769	5538.7	1576.9	409.5	79.3993	3.85079	0.259687	501175	4363.9	1177.2	592.4	114.846	1.98717	0.503228
	68391.9	3286.1	784.3	364.9	20.8125	2.14936	0.465256	59849.8	1122.6	358.9	222.5	53.3136	1.61303	0.61995	160924	2475.6	746.2	346.6	65.0042	2.15291	0.464487	82784	2436.3	788.5	199.2	33.9794	3.95833	0.252632	7725.8	472.2	192.6	56	16.3613	3.43929	0.290758	38122.2	992.7	343.8	150.1	38.4025	2.29047	0.436591	12739.5	647	201.8	90.4	19.6901	2.2323	0.447968
	43196.7	1067.8	420.6	135.4	40.4539	3.10635	0.321921	432094	5542.8	1506.9	487.5	77.9559	3.09108	0.323512	9870.2	575.9	249.8	52.7	17.1387	4.74004	0.210969	139161	3218.2	1125.5	222.2	43.242	5.06526	0.197423	28039.1	968.1	353.2	109.2	28.963	3.23443	0.309173	13910.6	550.4	169.8	112.1	25.2736	1.51472	0.660188	474520	4204.2	935.5	768.5	112.868	1.21731	0.821486
								53604.3	1529.9	461.2	169.3	35.0378	2.72416	0.367086	157234	2290.5	787.7	275.7	68.6461	2.85709	0.350006	73314.3	2078.9	820.6	150.1	35.2659	5.46702	0.182915	10118.6	573.5	231.6	59.2	17.6436	3.91216	0.255613	39825.5	1167.8	499.6	112.4	34.103	4.44484	0.22498	8526.8	453	151.8	74.5	18.823	2.03758	0.490777
					54.7156	3.53182	0.370138	11533	670.4	224.6	94.1	17.2032	2.38682	0.418967	90433.8	1898.8	739.1	165	47.6268	4.47939	0.223244	170480	2999.4	981.8	302.3	56.8381	3.24777	0.307904	12967.6	1140.6	511.2	41.4	11.3691	12.3478	0.0809859	8825.9	477.7	183.2	63.8	18.4758	2.87147	0.348253	97972.1	1919.1	677.4	199.8	51.0511	3.39039	0.294951
					34.7722	2.17234	0.183299	691142	5784.8	1465.3	854.1	119.476	1.71561	0.582884	163571	4197.3	1476.7	167.6	38.9704	8.81086	0.113496	315431	3046.1	1040.1	430.1	103.552	2.41827	0.413518	368842	5039.8	1802.7	319.8	73.1859	5.63696	0.177401	118899	1957	685	240.6	60.7556	2.84705	0.351241	187752	2454.9	740.8	351.2	76.4805	2.10934	0.474082
								489272	8770.9	2286.6	516.8	55.7836	4.42454	0.226012	39597.4	1030.9	409.5	127.6	38.4105	3.20925	0.3116	165882	6678.6	1338.1	230.6	24.8379	5.80269	0.172334	18503.5	857.1	365.4	75.1	21.5885	4.86551	0.205528	200542	2922	1194.2	220.9	68.6318	5.40607	0.184977	742430	10647.7	2023.7	944.6	69.7268	2.14239	0.466769
								126102	2414.6	732.3	231.8	52.225	3.15919	0.316537	243430	5779.6	1630.7	248.7	42.1188	6.5569	0.152511	19451.5	809.5	286.4	92.2	24.029	3.10629	0.321927	12055.1	623.2	269.7	58.1	19.3439	4.642	0.215425	13662.1	618.9	210.1	97.6	22.0748	2.15266	0.464541	41508.6	1373.5	414.9	147.3	30.221	2.8167	0.355025
								301252	3573.2	1257.5	323.8	84.3086	3.88357	0.257495	348884	7405.7	1602.6	531.2	47.1102	3.01694	0.331461	127167	3377	1250.9	159.9	37.6568	7.82301	0.127828	55941.3	1528.9	581.8	136.3	36.5892	4.26853	0.234273	335278	3408.9	1339.5	330.6	98.3536	4.05172	0.246809	67038.3	1603.1	420.8	217.6	41.8179	1.93382	0.51711
								841107	4993.9	1343.2	833.7	168.427	1.61113	0.620682	212328	3898.1	1455.2	217.3	54.4697	6.69673	0.149327	91143.5	1822	726.2	171.8	50.0239	4.22701	0.236574	14478.3	685.1	237.1	84.5	21.1331	2.80592	0.35639	7817.1	646.6	214	53.5	12.0895	4	0.25	47825.1	1212.7	437.7	154.8	39.4369	2.82752	0.353667
								316871	5332.6	1158.7	390.1	59.4214	2.97026	0.33667	32753.7	1253.5	560.9	80	26.1298	7.01125	0.142628	13525.3	623.9	225.3	81.2	21.6786	2.77463	0.360408	13018.3	831.4	260	84	15.6583	3.09524	0.323077	218260	3473.5	1239.4	242.4	62.8357	5.11304	0.195579	11908.1	543.9	171.8	97.6	21.8939	1.76025	0.568102
								2.09608e+06	12420.1	1956.1	1790	168.765	1.09279	0.915086	354957	7721.7	1133.4	685.1	45.9688	1.65436	0.604464	239217	5624.1	1674.5	374.3	42.5343	4.47368	0.223529	16272.9	809.1	281.3	96.7	20.1123	2.909	0.343761	161097	2851.3	1029.9	210	56.4994	4.90429	0.203903	32621.9	858.1	275.9	160.6	38.0164	1.71793	0.582095
								11969	624.8	261.1	59.2	19.1565	4.41047	0.226733	29514.3	1523.5	492.5	103	19.3727	4.78155	0.209137	32003.4	998.7	283.5	161	32.0451	1.76087	0.567901	236084	3449	1319.3	251.6	68.45	5.24364	0.190707	40530.2	1540.5	421.5	223	26.3098	1.89013	0.529063	689505	10499.1	2105	871	65.6728	2.41676	0.413777
								65400.9	3056.2	767.2	269.9	21.3994	2.84253	0.351799	27800.8	1497.8	647	92.6	18.5611	6.98704	0.143122	8030	576	217.5	54.7	13.941	3.97623	0.251494	79970.5	1999.5	843.3	128	39.9952	6.58828	0.151785	13672.3	595.8	156.1	119.2	22.9478	1.30956	0.763613	146826	2905.4	806.6	260.4	50.5357	3.09754	0.322837
								945299	14269.9	4359.8	454.7	66.2443	9.5883	0.104294	350664	8936.8	1825.1	508.5	39.2382	3.58918	0.278615	333524	3755.7	1414.5	311.3	88.8047	4.54385	0.220078	18128.3	918.4	363.4	72.2	19.739	5.03324	0.198679	90509.8	2194.1	745.8	170.9	41.2514	4.36396	0.22915	7913.4	457.6	170.2	65.9	17.2933	2.5827	0.387192
								37077.9	849.8	242.8	200.6	43.6313	1.21037	0.826194	118513	4487.4	1409.3	257.6	26.4103	5.47089	0.182786	110281	2153.1	557.2	337.7	51.2195	1.64999	0.606066	60985.4	1830.9	827.3	101.6	33.309	8.14272	0.122809	189546	3017.3	1236.7	205.1	62.8199	6.02974	0.165845	45696	1130.2	410.9	160.5	40.4318	2.56012	0.390606
								222523	4550.1	739.6	582.2	48.9051	1.27035	0.787182	10027.4	1021.2	325.6	85	9.81923	3.83059	0.261057	49675.5	1413.5	476.9	161	35.1436	2.96211	0.337597	57158	1554.9	534.4	157.5	36.7599	3.39302	0.294723	1.11855e+06	5664.1	1595.6	998.4	197.481	1.59816	0.625721	115173	3536.1	924.3	413.8	32.5705	2.23369	0.44769
								1.07747e+06	7630.9	2868.4	569	141.198	5.04112	0.198368	15786.2	729.1	294.5	77.1	21.6516	3.81971	0.2618	430173	6279.3	1401.7	668.4	68.5065	2.0971	0.47685	1.04944e+06	17188.1	3685.3	877.7	61.0559	4.19882	0.238162	71306.8	1430.9	587.4	162.5	49.8335	3.61477	0.276643	598270	9574	1862.7	979.6	62.4891	1.90149	0.525903
								8065.5	553.5	223.6	53	14.5718	4.21887	0.23703	121728	2862	1194.1	144.7	42.5323	8.25225	0.121179	22650.3	1044.3	377.7	90.6	21.6895	4.16887	0.239873	153447	4796.1	986.5	252.3	31.9941	3.91003	0.255753	218194	2843.1	677.2	449.7	76.7451	1.50589	0.664058	15700.1	813.2	294.2	101.4	19.3066	2.90138	0.344663
								260787	4496.8	1022	421.1	57.994	2.42698	0.412035	36358	1359.1	388.2	144	26.7515	2.69583	0.370943	187798	2703.1	836.2	318.4	69.4749	2.62626	0.38077	19218.3	1382.4	423.7	76.5	13.9021	5.53856	0.180552	161639	3670.9	1481.8	166.8	44.0326	8.88369	0.112566	271763	2431	773.7	460.3	111.79	1.68086	0.594933
								11142.6	474.1	182.2	79.7	23.5026	2.28607	0.437431	8922.2	409.2	150.5	77	21.804	1.95455	0.511628	149254	5025.3	2353.4	211.3	29.7006	11.1377	0.089785	423339	8104	2663.3	389.9	52.2383	6.83073	0.146397	32855.1	1141.6	361.8	145.7	28.7799	2.48318	0.402709	763696	7746.8	1574.6	756.4	98.5822	2.0817	0.480376
								1.63954e+06	21684.1	3161.8	2056	75.6102	1.53784	0.650263	11720.6	630.1	270.8	59.4	18.6012	4.55892	0.21935	18787.4	701	200.8	130.6	26.8009	1.53752	0.650398	28404.1	1412.5	512.9	78.6	20.1091	6.52545	0.153246	26234.4	1212.8	340.5	191	21.6313	1.78272	0.56094	8648.5	574.9	202.2	76.1	15.0435	2.65703	0.37636
								108010	2401.9	853.5	186.8	44.9684	4.56906	0.218864	182591	2892.8	1096.5	228.9	63.1192	4.7903	0.208755	138583	2444.3	927.4	270.1	56.6966	3.43354	0.291244	19522.4	1503.1	576.2	66.4	12.9881	8.67771	0.115238	2.32175e+06	21602.6	4566.2	2522.6	107.476	1.81012	0.552451	331907	5325.8	1781.3	458	62.3205	3.8893	0.257116
								402732	5211.4	1179.4	558.2	77.279	2.11286	0.473292	20536.3	1072.7	508.3	61.6	19.1445	8.25162	0.121188	52828.7	1010.1	315.2	228	52.3005	1.38246	0.72335	13870	661.1	248.2	74.2	20.9802	3.34501	0.298952	9175.7	636.4	210	71.1	14.4181	2.95359	0.338571	62693.8	1909.1	589.2	197.9	32.8395	2.97726	0.335879
								25585.5	765.7	275.4	123.1	33.4145	2.23721	0.446986	238705	4658	1106.1	630.3	51.2462	1.75488	0.56984	15725.4	683.8	268.1	83.6	22.9971	3.20694	0.311824	27598	1117.3	482.3	80.9	24.7006	5.96168	0.167738	13332.6	987.5	233.7	95.2	13.5014	2.45483	0.40736	18138.5	742.3	229.4	120.9	24.4355	1.89744	0.527027
								13849.7	618.9	258.4	70.5	22.3779	3.66525	0.272833	236763	2766.1	805.1	393.8	85.5946	2.04444	0.489132	60189.5	1690.4	464.8	183.3	35.6067	2.53573	0.394363	31268.3	1784.2	509.6	105.1	17.5251	4.84872	0.20624	9571.1	752.5	204.9	83.3	12.7191	2.45978	0.40654	627333	5751.1	1451.8	992.5	109.081	1.46277	0.683634
								51150.7	1231.5	317.1	228.8	41.5353	1.38593	0.721539	19497.1	1010.2	383	86.8	19.3002	4.41244	0.226632	428844	4332.4	1182.8	554.7	98.9854	2.13232	0.468972	30573.8	1082.1	300.9	139	28.2541	2.16475	0.461947	325240	7182	2409.6	262.9	45.2855	9.16546	0.109105	42527.6	1506.8	634.5	109.9	28.2238	5.77343	0.173207
								69745.4	1398.9	554	166.2	49.8573	3.33333	0.3	27912.4	1605.9	815.4	58.5	17.3812	13.9385	0.0717439	24541.2	757.4	241.7	143.8	32.4019	1.68081	0.594952	356656	7234.9	2093.3	351.2	49.2965	5.96042	0.167773	16409.8	726.1	237.2	108.8	22.5999	2.18015	0.458685	792582	9587	2223.2	603.6	82.6726	3.68323	0.271501
								536697	7364	2138.2	744.6	72.8812	2.87161	0.348237	43161.2	2222	1042	100.9	19.4245	10.3271	0.096833	123760	2675.2	509.4	420.2	46.2621	1.21228	0.824892	34735.8	1509.9	578.8	91.6	23.0054	6.31878	0.158258	241245	5184.8	1375.9	639.5	46.5292	2.15152	0.464787	456138	5056.9	1077.8	642.5	90.2012	1.67751	0.596122
								21317	783.1	261.4	128.1	27.2213	2.04059	0.490054	215735	2673.7	890.4	320.6	80.6879	2.77729	0.360063	1.20227e+06	14021.9	4189.7	1036.1	85.7426	4.04372	0.247297	177709	4076.7	813.8	358.2	43.5915	2.27192	0.440157	12318.7	526.9	181.1	88.4	23.3796	2.04864	0.488128	570079	4371.3	1381.2	553.4	130.414	2.49584	0.400666
								252342	6446.7	1527.7	525.2	39.1428	2.9088	0.343785	84193.3	2157.1	685.7	170.4	39.0308	4.02406	0.248505	17296.9	704.4	250.1	93.6	24.5555	2.67201	0.37425	14042.4	777.7	316.8	81.1	18.0563	3.90629	0.255997	13900.4	775.3	190.1	124.2	17.9291	1.5306	0.65334	20465.3	726.5	244.7	114.7	28.1697	2.13339	0.468737
								120658	1729.2	479.9	352.7	69.7767	1.36065	0.734945	8308.8	481.9	168.9	74.6	17.2418	2.26408	0.441681	160828	2928.1	757.9	405.6	54.9258	1.86859	0.535163	14407.4	800.8	367	54.5	17.9913	6.73394	0.148501	15314.8	615.9	227.1	92.7	24.8657	2.44984	0.40819	444352	4960.1	1288.1	514.4	89.5853	2.50408	0.399348
								69557.8	1429.1	353	268.2	48.6725	1.31618	0.759773	14858.5	572.1	209.3	93.5	25.9719	2.2385	0.446727	7796.8	470.3	177.9	58.9	16.5784	3.02037	0.331085	50831.3	1365.5	417.5	167.5	37.2254	2.49254	0.401198	31760.1	820.8	280	155.5	38.6941	1.80064	0.555357	55333	1392.7	557.2	144.7	39.7307	3.85073	0.259691
								145037	2248.3	859.8	227.5	64.5095	3.77934	0.264596	25889.6	919.9	345.6	107.3	28.1439	3.22088	0.310475	349492	3178.5	905.4	532	109.955	1.70188	0.587586	29002.3	1170.5	439	93.6	24.7777	4.69017	0.213212	71813.7	1662	624.3	211.2	43.2092	2.95597	0.338299	8075.6	503.9	178.9	64.6	16.0262	2.76935	0.361096
								7756.2	424.4	164.7	62.5	18.2757	2.6352	0.379478	61380.8	2302.5	717.7	236.6	26.6583	3.03339	0.329664	359489	4382.4	1629.5	365	82.0303	4.46438	0.223995	34690.2	1029.7	315.3	163.3	33.6896	1.9308	0.517919	157746	2838.8	753.4	312.6	55.5678	2.41011	0.414919	273866	3598.9	1364.5	347.7	76.0973	3.92436	0.254819
								22112.9	632.3	201.9	143.1	34.9722	1.4109	0.708767	718391	8662.4	3484.1	498.3	82.9321	6.99197	0.143021	44225.8	1234.1	466.6	129.6	35.8365	3.60031	0.277754	140211	3673.7	1314.9	265.1	38.166	4.96002	0.201612	19208.1	652.8	229.6	110.2	29.4242	2.08348	0.479965	1.46488e+06	16820.5	2735.3	1357.6	87.0887	2.01481	0.496326
								275367	3843.9	1153.9	369.5	71.6374	3.12287	0.320218	516500	8461.1	1517.3	989.9	61.0441	1.53278	0.652409	96948	2083.3	693.2	195.9	46.5358	3.53854	0.282602	910487	10784.3	2102.3	687.5	84.4271	3.05789	0.327023	597784	6640.2	1467.8	775.4	90.0249	1.89296	0.528274	56569.9	1335.1	522.2	146.5	42.3713	3.56451	0.280544
								208379	2477.9	671.1	442.3	84.0952	1.5173	0.659067	9834.7	730	294.2	49.6	13.4722	5.93145	0.168593	37954.9	1415	498.8	148.6	26.8233	3.35666	0.297915	69375.3	2469.1	1141.9	98.9	28.0974	11.546	0.08661	48088.7	1132.1	404.9	155.3	42.4774	2.60721	0.383551	10301.1	664.9	239.2	89.8	15.4927	2.6637	0.375418
								291321	2870.2	771.3	504.8	101.498	1.52793	0.654479	38046.2	1076	362.1	141.3	35.3589	2.56263	0.390224	146552	3274.8	749.9	325.1	44.7516	2.30667	0.433524	462384	3717.7	1112.8	561	124.374	1.9836	0.504134	13297.1	858.3	330.1	69.6	15.4924	4.74282	0.210845	41148.7	1131.7	342.7	166.6	36.3601	2.05702	0.486139
								646090	7175.8	1497.9	742	90.0374	2.01873	0.49536	132444	3346.2	801.3	468.9	39.5805	1.70889	0.585174	82469.7	1999.2	775.2	156.4	41.2514	4.95652	0.201754	226710	4413	1941.6	270.4	51.3733	7.18047	0.139267	11487.4	557.3	167	113.3	20.6126	1.47396	0.678443	45731.4	1342.8	434.9	153.1	34.0567	2.84063	0.352035
								86910.5	1644.2	397.6	309.1	52.8588	1.28632	0.777414	46821.4	1031.3	368	166.2	45.4004	2.2142	0.45163	35283.3	1067.6	363.8	141.2	33.0492	2.57649	0.388125	269167	2952	1154.6	313.2	91.1813	3.68646	0.271263	301003	3222.5	868.2	509.9	93.4067	1.70269	0.587307	28125.3	827.7	244.2	158.1	33.9801	1.54459	0.64742
								238421	2870.7	983.5	367.8	83.0533	2.67401	0.373971	46491.9	1418.2	413.2	186.9	32.7823	2.21081	0.452323	11304.9	807.3	320.9	49.9	14.0033	6.43086	0.1555	392968	11115.3	2754.9	239.6	35.3538	11.4979	0.0869723	42147.3	1269.4	466.2	124.6	33.2025	3.74157	0.267267	18331.1	649.1	231.8	104	28.2408	2.22885	0.448663
															16734.2	676.8	270.9	84.1	24.7255	3.22117	0.310447	98245.8	2068.2	640.6	221.4	47.503	2.89341	0.345613	371428	9501.1	2364.5	449.2	39.0931	5.2638	0.189977	45645.3	1536.4	528.6	119.5	29.7093	4.42343	0.226069	16724.1	994.9	471.8	63.4	16.8098	7.44164	0.134379
												60.4102	3.35478	0.405417	9479.9	422	151.6	82.2	22.4642	1.84428	0.542216	138360	2786.5	653.6	316.6	49.6538	2.06443	0.484394	84507.6	1691.6	637.3	185.2	49.9572	3.44114	0.290601	232074	3896.9	1239.9	327.2	59.5535	3.78943	0.263892	12759.8	523.2	162.3	103.9	24.388	1.56208	0.640173
												36.6309	2.07876	0.205685	123725	3145.4	677.5	362.8	39.3352	1.86742	0.535498	133504	2172.1	514.2	363	61.463	1.41653	0.705951	89901.5	1895.8	785.6	154	47.4214	5.1013	0.196029	461076	5519.1	1381.4	676.7	83.5419	2.04138	0.489865	23294.1	1017.6	411	86	22.8912	4.77907	0.209246
															11517.8	703.2	276.2	69.3	16.3791	3.98557	0.250905	123497	3361.3	1007.5	268.7	36.7408	3.74953	0.2667	15066.4	687.4	262.5	80.8	21.918	3.24876	0.30781	85415	1393.2	473.7	240.6	61.3085	1.96883	0.507916	288811	3656.3	1279.7	375	78.99	3.41253	0.293037
															14878.8	1309	388.8	127.2	11.3665	3.0566	0.32716	166830	3225.8	749.6	409.1	51.7175	1.83231	0.545758	38416.2	1952	762.9	115.9	19.6804	6.5824	0.15192	118270	3369	825.7	451.7	35.1054	1.82798	0.547051	22888.5	901.1	185.3	175.2	25.4006	1.05765	0.945494
															32256.9	2273.4	437.4	350.9	14.1888	1.24651	0.802241	23780.8	952.5	270.5	137.9	24.9667	1.96157	0.509797	262080	3606.2	866.8	481.2	72.6749	1.80133	0.555145	8678.9	430.7	168.7	67.7	20.1507	2.49188	0.401304	165213	2161.3	662.9	330.1	76.4415	2.00818	0.497963
															37589.9	1253.2	416.6	122.4	29.9951	3.40359	0.293807	175504	4503.3	1605.5	341.8	38.9723	4.69719	0.212893	38228.7	1627.4	701.2	81.1	23.4907	8.64612	0.115659	11583.7	753.3	344.7	46.6	15.3773	7.397	0.13519	7923.5	596.1	257.5	53.7	13.2922	4.79516	0.208544
															110418	3077	939.4	319.6	35.8848	2.9393	0.340217	109698	3049.2	847.2	360.5	35.9759	2.35007	0.425519	220668	3328	909.1	375.1	66.3064	2.42362	0.412606	244403	3407.1	1184.7	289.4	71.7334	4.09364	0.244281	589678	6142.5	1167	1059.3	95.9996	1.10167	0.907712
															90008	3091.3	1501.9	133.3	29.1166	11.2671	0.0887542	128120	3045.7	677.3	285.9	42.0659	2.36901	0.422117	199721	3527.9	1133.2	302.5	56.6118	3.74612	0.266943	137737	3342.7	537	484.1	41.2053	1.10927	0.90149	12166.7	849.4	411.8	53.4	14.3239	7.71161	0.129675
															627202	6305.2	992.7	897.9	99.4737	1.10558	0.904503	14022.1	805.3	331.5	60.7	17.4123	5.46129	0.183107	76878.1	1364.1	501.6	208.6	56.3581	2.4046	0.415869	8491.3	595.7	169.9	112.7	14.2543	1.50754	0.663331	298484	6089.5	1350.8	432.1	49.0161	3.12613	0.319885
															45391.8	1536.7	625	101.8	29.5385	6.13949	0.16288	432327	4041.9	856.2	773.3	106.961	1.1072	0.903177	9606.6	492.8	165.6	89.4	19.4939	1.85235	0.539855	14260.3	662	271.7	76.2	21.5412	3.56562	0.280456	71463.9	1191.5	350.9	279.8	59.9781	1.25411	0.797378
															80087.1	2797.1	597.9	305.7	28.6322	1.95584	0.51129	31719.5	1305.6	433.1	119	24.295	3.6395	0.274763	19350.1	822.8	348.2	74.5	23.5174	4.67383	0.213957	569937	11632.6	2759.5	826.7	48.9948	3.33797	0.299583	568720	6410.6	1201.3	692	88.7156	1.73598	0.576043
															10144	611.9	176.2	104.4	16.5779	1.68774	0.592509	43217	1328.7	460.7	134.3	32.5258	3.43038	0.291513	153371	3697.3	1160.7	258.6	41.4819	4.4884	0.222797	86327.5	1655.5	427.6	284.7	52.1459	1.50193	0.665809	30933.7	906.5	330.6	128.4	34.1243	2.57477	0.388385
															22624.9	929.6	399.6	74.7	24.3383	5.3494	0.186937	35090.7	913.9	279.9	180.4	38.3967	1.55155	0.644516	230026	6143.8	1764.5	381.2	37.4403	4.6288	0.216039	12658.4	691.7	239.8	71.1	18.3004	3.37271	0.296497	20749.2	958.2	225.8	128.6	21.6544	1.75583	0.569531
															32784.1	1394.3	404.9	190.8	23.5129	2.12212	0.471227	58876.5	1724.3	495.1	165.2	34.1452	2.99697	0.33367	9368.3	501.4	158.5	82	18.6843	1.93293	0.51735	12217.4	794.3	351.2	46	15.3813	7.63478	0.130979	344788	5275.7	1161.5	615.6	65.354	1.88678	0.530004
															147130	3667.9	603.7	573.3	40.113	1.05303	0.949644	88030.9	3270.8	1020	273.7	26.9142	3.72671	0.268333	667788	6325.4	2051.5	431.7	105.572	4.75214	0.210431	15781.2	604.5	227.4	91.8	26.1062	2.47712	0.403694	230452	3295.8	841.4	380	69.9229	2.21421	0.451628
															23699.6	1028.6	277	167.1	23.0406	1.65769	0.603249	32844.9	1026.2	393.9	119.1	32.0063	3.3073	0.302361	158212	2507.6	959.9	217.1	63.0931	4.42146	0.226169								427729	4959.8	1549.4	401.9	86.2392	3.85519	0.259391
															46669.3	1291.3	358.5	174.9	36.1413	2.04974	0.487866	22356.2	1055.3	400.2	81.2	21.1847	4.92857	0.202899	60351.7	1429.5	596.6	134.4	42.2187	4.43899	0.225277					48.9419	3.393	0.375722	61821.9	1350.8	350.7	237.1	45.7669	1.47912	0.676076
															12572.2	794.9	244.3	76.3	15.8161	3.20183	0.312321	125955	3446.8	821	409.2	36.5427	2.00635	0.498417	10179.4	507.9	206.8	64.8	20.0421	3.19136	0.313346					30.2303	1.82312	0.179592	347890	3982.9	1174.5	493.7	87.346	2.37898	0.420349
															18391.9	1086.9	457.2	81.4	16.9214	5.61671	0.17804	25859.2	887.4	300.4	117.4	29.1404	2.55877	0.390812	58658.5	1360.2	472.2	180.5	43.1249	2.61607	0.382253								115239	1865	649.4	248.3	61.7901	2.61538	0.382353
															25783.2	893.6	317.9	113.9	28.8532	2.79104	0.358289	122422	3125.7	554.3	420.1	39.1663	1.31945	0.757893	316125	6939.7	1584.6	517	45.5532	3.06499	0.326265								27344.6	730.9	229.3	158.9	37.4122	1.44305	0.692979
															34715.5	950.3	357.8	131.1	36.5311	2.72921	0.366406	80746.1	2366.8	977.6	117.2	34.1161	8.3413	0.119885	221215	4584.9	1084.8	422.6	48.2487	2.56697	0.389565								448433	6616.2	1567.1	454.6	67.778	3.44721	0.29009
															31019.9	1279.5	348	150.6	24.2438	2.31076	0.432759	23334.6	812.3	311.1	111.8	28.7266	2.78265	0.35937	58932.3	2320.3	829.1	139.1	25.3986	5.96046	0.167772								920925	6512.5	2008.3	787.5	141.409	2.55022	0.392123
															169821	4015.6	1167.3	259.9	42.2904	4.49134	0.222651	61624.1	1502.3	661.4	128.9	41.0198	5.13111	0.19489	372928	4873	1837.5	280.3	76.5296	6.55548	0.152544								17864.7	800.1	285.5	91	22.3281	3.13736	0.318739
															11969	571.8	239	67.9	20.9321	3.51988	0.2841	21195.3	761.1	263	116.9	27.8482	2.24979	0.444487	309738	3975.7	1311.4	349.2	77.9078	3.75544	0.26628								18300.7	725.2	173.2	143.6	25.2354	1.20613	0.829099
															114706	3207.5	1157.1	155.9	35.7619	7.42207	0.134733	74966.9	1563.4	460.3	231.3	47.9512	1.99006	0.502498	90002.9	2172.1	613.7	198.9	41.4359	3.08547	0.3241								848026	6056.5	1615	768.9	140.019	2.1004	0.476099
															40236.2	1334.4	410.5	194.5	30.153	2.11054	0.473812	46618.6	1754.6	340	243.8	26.5694	1.39459	0.717059	29164.5	913.8	300.2	139.4	31.9156	2.15352	0.464357								16171.5	865.6	216.7	105	18.6824	2.06381	0.484541
															25124.2	1473.8	500.3	105	17.0472	4.76476	0.209874	128683	1905.9	578.5	305	67.5181	1.89672	0.527226	20465.3	623.9	177	159.9	32.8022	1.10694	0.90339								48565.3	1289.5	363	195	37.6621	1.86154	0.53719
															24982.2	677.6	248.7	132.5	36.8687	1.87698	0.53277	229332	2233.1	624.2	492.3	102.696	1.26793	0.78869	98053.2	2141.8	815.1	161.9	45.7807	5.03459	0.198626								329225	4431.8	914.5	641	74.2869	1.42668	0.700929
															9069.2	741.5	226.2	70.1	12.2309	3.22682	0.309903	19481.9	598.5	216	117.4	32.5512	1.83986	0.543519	27298.9	1302.5	583.1	63.6	20.9588	9.16824	0.109072								74596.9	1551.9	450.8	233.5	48.0681	1.93062	0.517968
															152747	4039.7	1146.9	359.5	37.8116	3.19026	0.313454	17550.4	1013.5	384.2	69	17.3166	5.56812	0.179594	33635.8	1150.1	460.1	102.8	29.246	4.47568	0.22343								209540	4267.9	1204.4	280.3	49.0968	4.29682	0.23273
															9474.8	623.4	280	45.2	15.1986	6.19469	0.161429	27187.4	972.2	280.3	160.3	27.9648	1.7486	0.571887	72493	1482.8	569.3	171	48.8893	3.32924	0.300369								702133	8153.1	2009.4	1192	86.1185	1.68574	0.593212
															82697.8	2984.5	518.3	281	27.7091	1.84448	0.542157								189511	4893.1	1540.4	441.4	38.7303	3.48981	0.286549								15198.2	672.7	248.6	83.6	22.5928	2.97368	0.336283
															30731	1355.1	370.5	130.4	22.678	2.84126	0.351957					49.1175	3.50182	0.389565	87965	2174.1	936.9	128.3	40.4604	7.30242	0.136941								101328	2356.9	459.7	365.7	42.9921	1.25704	0.795519
															22706	1507.5	393.6	196.3	15.062	2.00509	0.49873					32.8135	1.62744	0.211183	75458.7	2213	996.1	105.2	34.0979	9.46863	0.105612								385962	3851	1118.7	520.2	100.224	2.15052	0.465004
															39232.4	1569.2	567.1	96.8	25.0015	5.85847	0.170693								91204.3	3673.6	975.3	413.8	24.827	2.35694	0.42428								403426	4152.9	1237.7	454.9	97.1433	2.72082	0.367537
															160230	4737.3	1025.1	451.7	33.823	2.26943	0.44064								136414	3799.1	1504	138.1	35.9068	10.8907	0.0918218								16521.3	939	410.2	55.8	17.5946	7.35125	0.136031
															34893	1323.8	566.6	86.5	26.3582	6.55029	0.152665								21408.3	849.5	197.2	151.2	25.2011	1.30423	0.766734								13854.8	739.5	191.8	114.9	18.7354	1.66928	0.599062
															9170.6	516.6	182	82.2	17.7518	2.21411	0.451648								213880	5163.2	1477.7	232.5	41.4239	6.3557	0.157339								484101	5676.2	1874.6	366.1	85.2862	5.12046	0.195295
															40043.5	1445.9	357.5	208.4	27.6945	1.71545	0.582937								204217	2636.1	1005.5	279.2	77.4695	3.60136	0.277673								126934	1885.9	673.4	252.8	67.3068	2.66377	0.375408
															345361	7293	1706.1	620.4	47.3551	2.75	0.363636								185491	3842	1613.2	164.4	48.2798	9.81265	0.101909								15395.9	581	163.2	129.1	26.499	1.26414	0.791054
															26112.7	919.9	308.3	112.8	28.3865	2.73316	0.365877								12673.6	677.7	243.3	88.1	18.7009	2.76163	0.362104								39992.8	941.9	306.5	172.2	42.4597	1.77991	0.561827
															96618.5	4388.9	1428.4	319	22.0143	4.47774	0.223327								399097	6657.2	2436.5	361.1	59.9497	6.74744	0.148204								17910.3	586.6	203.2	118.7	30.5324	1.71188	0.584154
															20683.3	1009.3	438.5	75.2	20.4927	5.83112	0.171494								7812	492.1	185.3	57.3	15.8748	3.23386	0.309228								9459.6	525.3	208.6	68.3	18.008	3.05417	0.327421
															24657.8	930.9	406.9	80.8	26.4881	5.03589	0.198575								20881	678.8	232.5	123	30.7616	1.89024	0.529032								30852.6	1095.3	338.6	151.7	28.1682	2.23204	0.448021
															11527.9	775.4	324.8	51.9	14.867	6.25819	0.159791								9059.1	521	178.4	80.3	17.3879	2.22167	0.450112								311938	4762.2	1590.4	315.4	65.5029	5.04249	0.198315
															22741.5	1125.5	322	105.1	20.2057	3.06375	0.326398								164848	2347.6	699.5	317.1	70.2198	2.20593	0.453324								458115	6344.7	1627.6	613.5	72.2044	2.65297	0.376935
																																											315431	4072.8	804.3	607	77.4482	1.32504	0.754694
																			37.1242	4.21882	0.322586												41.4598	4.46893	0.296796								354608	4230	1087.3	545.9	83.8316	1.99176	0.502069
																			23.9194	2.52649	0.1765												26.9071	2.64099	0.157222								242664	3790.6	1510.2	319.3	64.0173	4.72972	0.211429
																																											119892	2068.5	627.9	274.7	57.961	2.28577	0.43749
																																											86322.5	1611.8	467.3	253.5	53.5566	1.84339	0.542478
																																											231435	2900.7	860.3	391.9	79.786	2.1952	0.455539
																																											10868.9	526	191.6	75.3	20.6633	2.54449	0.393006
																																											13337.7	622.9	167.9	113.6	21.4123	1.47799	0.676593
																																											72994.9	2517.9	444.7	330	28.9904	1.34758	0.742073
																																											8303.7	428.4	161.7	67.2	19.3831	2.40625	0.415584
																																											427836	6757	1688	575.2	63.3174	2.93463	0.340758
																																											106935	2619.8	698.1	266.4	40.8179	2.6205	0.381607
																																											127988	1998.4	757.6	228.5	64.0453	3.31554	0.30161
																																											112623	1979.4	547.2	288	56.8974	1.9	0.526316
																																											28617	909.9	236.1	170.9	31.4507	1.38151	0.723846
																																											144555	2151.5	705.6	301	67.1881	2.34419	0.426587
																																											178059	2695.8	759.8	342.3	66.0506	2.21969	0.450513
																																											412850	6913.1	1929.3	627.4	59.72	3.07507	0.325196
																																											215147	3625.8	1231.1	263.4	59.3379	4.67388	0.213955
																																											305708	4199	1111.8	428.5	72.8049	2.59463	0.385411
																																											361451	4659.4	1001.2	576.4	77.5746	1.73699	0.575709
																																											9038.8	646.4	253.8	52.8	13.9833	4.80682	0.208038
																																											71610.9	2176.1	731.7	170.7	32.9079	4.28647	0.233292
																																											34127.5	1058.6	406.9	115.4	32.2383	3.526	0.283608
																																											368341	4156.7	1544.5	362.1	88.6137	4.2654	0.234445
																																											1.0806e+06	15005.4	2945.8	877.6	72.0139	3.35665	0.297916
																																											587772	5687.4	1773.8	488.9	103.346	3.62814	0.275623
																																											434710	6269.6	1322.7	492.4	69.3361	2.68623	0.372269
																																											17423.7	613.7	180.1	129.2	28.3912	1.39396	0.717379
																																											20308.2	852.2	201.1	169.5	23.8303	1.18643	0.842864
																																											32114.9	1719.1	664.7	114	18.6812	5.8307	0.171506
																																											183909	2850.4	768.5	383.7	64.5205	2.00287	0.499284
																																											335663	6070.6	2256.8	266.4	55.2932	8.47147	0.118043
																																											16992.8	583.1	174.5	131.4	29.1422	1.32801	0.753009
																																											7888.1	495.5	175.8	68.8	15.9195	2.55523	0.391354
																																											24718.6	1034.5	232.3	187.8	23.8942	1.23695	0.808437
																																											638451	7391.9	1714	706	86.3717	2.42776	0.411902
																																											412323	3892.4	1033.6	555.4	105.93	1.861	0.537345
																																											725346	8025.3	1829.1	1053.4	90.3824	1.73638	0.575912
																																											474951	3890	1039.5	633.2	122.095	1.64166	0.609139
																																											54638.5	1221.9	345.8	214.5	44.716	1.61212	0.620301
																																											525199	6004.4	1282.2	678.5	87.4691	1.88976	0.529169
																																											65755.7	1555.5	447.4	214.3	42.273	2.08773	0.47899
																																											309971	3550.8	1267	325	87.2961	3.89846	0.256511
																																											142320	3000.4	939.6	225.9	47.4335	4.15936	0.240421
																																											900414	8831.3	2630.2	626.8	101.957	4.19623	0.238309
																																											11771.2	561.3	161.1	105.4	20.9713	1.52846	0.654252
																																											122559	2632.3	571.3	302.7	46.5596	1.88735	0.529844
																																											21109.2	870.7	324	96	24.2439	3.375	0.296296
																																											42801.3	1866.8	501.1	201.6	22.9276	2.48562	0.402315
																																											22837.8	1119.7	359.8	112	20.3964	3.2125	0.311284
																																															53.738	2.70573	0.442432
																																															32.4865	1.25482	0.18059
[truncated: 119 more columns]

## Sheet: 400 degree C
	Area	Perimetre	Lenght	Width	A/P	L/W	W/L		Area	Perimetre	Lenght	Width	A/P	L/W	W/L		Area	Perimetre	Lenght	Width	A/P	L/W	W/L	Area	Perimetre	Lenght	Width	A/P	L/W	W/L	Area	Perimetre	Lenght	Width	A/P	L/W	W/L	Area	Perimetre	Lenght	Width	A/P	L/W	W/L	Area	Perimetre	Lenght	Width	A/P
Graminoids																																													Forbs
	Agropyron cristatum S&L	Agropyron cristatum S&L	Agropyron cristatum S&L	Agropyron cristatum S&L	Agropyron cristatum S&L	Agropyron cristatum S&L	Agropyron cristatum S&L		Agropyron cristatum I	Agropyron cristatum I	Agropyron cristatum I	Agropyron cristatum I	Agropyron cristatum I	Agropyron cristatum I	Agropyron cristatum I		Festuca sp.	Festuca sp.	Festuca sp.	Festuca sp.	Festuca sp.	Festuca sp.	Festuca sp.	Festuca sp.	Festuca sp.	Festuca sp.	Festuca sp.	Festuca sp.	Festuca sp.	Festuca sp.	Stipa capilata	Stipa capilata	Stipa capilata	Stipa capilata	Stipa capilata	Stipa capilata	Stipa capilata	Poa sp.	Poa sp.	Poa sp.	Poa sp.	Poa sp.	Poa sp.	Poa sp.	Astragalus sp.	Astragalus sp.	Astragalus sp.	Astragalus sp.	Astragalus sp.
	27897.1	1450.5	227.9	186.5	19.2327	1.22198	0.818341		97449.9	2028.2	633.7	223	48.0475	2.8417	0.351902		120445	3389.6	844.8	303.4	35.5337	2.78444	0.359138	181816	2528	785.5	317.1	71.9207	2.47714	0.403692	10919.6	863.3	247.2	90.7	12.6487	2.72547	0.366909	392147	5458.5	1712.3	420.3	71.8415	4.07399	0.245459	262683	4220.4	1073.2	364	62.2413
	102824	1731.1	467.1	340.9	59.3978	1.3702	0.729822		66734.1	1687.5	603.7	167.5	39.5461	3.60418	0.277456		370647	6386.2	1899.5	392.3	58.0388	4.84196	0.206528	267134	3759.4	949.2	426.3	71.0577	2.2266	0.449115	37077.9	1250	404	130.9	29.6623	3.08633	0.32401	9702.9	725.8	329.2	40.5	13.3686	8.1284	0.123026	211928	3872	764.4	433.6	54.7335
	47951.9	1224.5	334.3	203.9	39.1604	1.63953	0.609931		266693	2734.6	866.2	429.6	97.5255	2.01629	0.495959		13667.2	1052.5	248.7	106.1	12.9855	2.34402	0.426618	361015	3124	957.6	501.4	115.562	1.90985	0.523601	18224.6	822.9	354	70.2	22.1468	5.04274	0.198305	12121	622.1	268.1	67.9	19.484	3.94845	0.253264	71970.9	2566.8	497.3	295.6	28.0392
	29504.2	975.9	305	147.9	30.2328	2.0622	0.484918		691528	5348.4	1886.7	501.6	129.296	3.76136	0.265861		139070	2409.9	610.9	320.6	57.7078	1.90549	0.524799	28115.1	1329	328.5	187.4	21.1551	1.75293	0.570472	46917.7	1174.6	403.9	156.1	39.9436	2.58744	0.386482	27466.2	788.1	249.7	147.7	34.8512	1.69059	0.59151	8638.3	529.7	150.6	95.5	16.3079
	1.40832e+06	23566.1	4054.8	2227.3	59.7603	1.8205	0.5493		790326	5049.5	1732.6	587.9	156.516	2.9471	0.339317		66440.1	2857.5	957.6	115.6	23.2511	8.28374	0.120718	517529	4415	1240.8	560.1	117.221	2.21532	0.451402	26285.1	1399.5	302.3	223.2	18.7818	1.35439	0.738339	25266.1	734.8	225.2	152.9	34.385	1.47286	0.678952	53437	1330.5	327.8	236.1	40.1631
	225033	3921.4	1348.3	249.2	57.3858	5.41051	0.184825		124571	2155.8	677.3	249.9	57.7843	2.71028	0.368965		16419.9	607.9	225.2	101.5	27.0109	2.21872	0.45071	123466	2045	559.6	311.5	60.3747	1.79647	0.556648	26269.9	916.1	268.7	150	28.6758	1.79133	0.558243	19269	992	340.2	84.3	19.4244	4.03559	0.247795	162805	2807.7	832	298.4	57.9853
	183605	2507.2	727.3	359.8	73.2311	2.0214	0.494706		166800	2213.7	723.7	313.4	75.3489	2.30919	0.433052		294737	6439.5	1208.3	631.7	45.7702	1.91278	0.522801	165761	2776.5	621.4	385.8	59.7013	1.61068	0.620856	67423.6	1467.7	551.7	165.4	45.9383	3.33555	0.299801	222270	11246.1	2946.6	991.2	19.7642	2.97276	0.336388	21996.3	972	295.3	121	22.6299
	100963	2383.5	690	260.5	42.3591	2.64875	0.377536		506584	3925.1	1452	452.7	129.063	3.20742	0.311777		7644.7	577.1	161.9	91.6	13.2468	1.76747	0.565781	544818	5253.3	1213.7	607.4	103.71	1.99819	0.500453	132911	2482.5	704.2	278.9	53.5391	2.52492	0.396052	9926	863.8	423.1	40.6	11.4911	10.4212	0.0959584	691482	5317.9	1976.8	505	130.029
	3.01664e+06	20048.6	3051.1	2378.3	150.467	1.28289	0.779489		676700	4231.3	1566.8	559.4	159.927	2.80086	0.357033		10047.6	679.5	190.2	85.8	14.7868	2.21678	0.451104	22097.7	1227.7	213.8	161.5	17.9993	1.32384	0.755379	196096	2378	756.6	348.3	82.4627	2.17227	0.460349	224607	3944.1	1134.3	368.9	56.9475	3.07482	0.325223	66536.4	1248.5	434.8	206.1	53.2931
	8805.6	722.6	304.6	40.1	12.186	7.59601	0.131648		12293.4	521.5	183	91.5	23.5732	2	0.5		10610.3	824.4	243.7	93.1	12.8703	2.61762	0.382027	22822.6	961.8	247.2	149.7	23.729	1.6513	0.605583	8197.3	517.9	160.6	77.4	15.828	2.07494	0.481943	42182.8	1521.7	536.9	126.8	27.7208	4.23423	0.236171	68031.9	1592.9	360.9	298.6	42.7095
	138740	3061	643.9	388.8	45.3252	1.65612	0.60382		86403.6	2070.9	423.6	337	41.7227	1.25697	0.795562		21570.5	1039.9	306	107.7	20.7429	2.84123	0.351961	28581.5	1102.9	286.3	157.7	25.9149	1.81547	0.550821	18087.8	822.4	367.5	66.5	21.9939	5.52632	0.180952	80097.2	1516.1	551.2	189.5	52.8311	2.90871	0.343795	86520.2	2830.6	472.7	366.8	30.566
	16850.8	1088.5	510.8	45.5	15.4808	11.2264	0.089076		395741	4651.9	1180	594.5	85.0708	1.98486	0.503814		18893.8	1486.7	465.6	87.2	12.7085	5.33945	0.187285	35283.3	790.7	290.4	159.6	44.6229	1.81955	0.549587	8379.8	456.6	195.3	57.4	18.3526	3.40244	0.293907	67879.8	2503	904.3	178.5	27.1194	5.06611	0.19739	915531	4916.4	1484	824	186.22
	19248.7	1039.3	288.9	105.2	18.5208	2.7462	0.36414		15517.6	715.9	163.2	137.6	21.6757	1.18605	0.843137		50060.7	1288	472.3	148.5	38.867	3.18047	0.314419	595568	4460.6	1400.7	549.9	133.518	2.54719	0.392589	27030.3	1118.3	458.3	93.3	24.1709	4.91211	0.203578	72432.2	1985.6	782.3	136.3	36.4787	5.73955	0.17423	17575.8	763.6	234.8	108.2	23.017
	372817	4233.2	935.1	594.5	88.0698	1.57292	0.635761		149838	2204.2	834.9	236.8	67.9782	3.52576	0.283627		7680.2	695	312.9	35.6	11.0506	8.78933	0.113774	33133.9	1045	245.9	185	31.7071	1.32919	0.752338	15527.7	707.2	222.9	104.4	21.9566	2.13506	0.468371	58481.1	2778.8	554.6	352.8	21.0455	1.572	0.636134	573912	9486.9	1618.7	788.8	60.4952
	17525.1	744.1	214.3	117.4	23.5521	1.82538	0.54783		230310	2251.2	661.9	456.6	102.305	1.44963	0.689832		397444	13126.4	2835.7	700.7	30.2782	4.04695	0.247099	34086.9	1372.6	294.7	198.8	24.8338	1.48239	0.674584	8597.8	517.5	217.9	54.9	16.6141	3.96903	0.25195	124658	4666.7	935.5	519.5	26.7122	1.80077	0.555318	26406.7	746.5	254.8	135.7	35.374
	482190	9097.6	2774.3	756.7	53.0019	3.66631	0.272753		244139	3212.1	761.5	477.8	76.0061	1.59376	0.627446		145260	5715.7	950	473	25.4142	2.00846	0.497895	44291.7	1421.1	360.2	181.9	31.1672	1.98021	0.504997	56585.1	1247.6	424.3	177.2	45.3552	2.39447	0.417629	19167.6	931.3	238.9	147.9	20.5816	1.61528	0.619087	19481.9	1007	330.2	114.5	19.3465
	201272	3235	991.8	291.3	62.217	3.40474	0.293708		137772	3055.6	673.8	376	45.0884	1.79202	0.558029		28799.5	1145.5	449.8	87.5	25.1414	5.14057	0.194531	245178	4149.3	840.5	412.8	59.0891	2.03609	0.491136	48986	2046.1	572.1	172.3	23.9412	3.32037	0.301171	24282.6	2371.3	413.3	219.6	10.2402	1.88206	0.531333	191513	3402.7	1043.9	296.9	56.2828
	134011	4916.9	1226.3	200.2	27.2551	6.12537	0.163255		27273.6	956.3	345.2	114.9	28.5199	3.00435	0.332851		29225.3	909.2	346.3	110.4	32.144	3.13678	0.318799	15735.6	613.3	194	108.8	25.6573	1.78309	0.560825	9875.3	696.8	285.4	51.6	14.1724	5.53101	0.180799	95716.1	4445.8	1348.7	492.1	21.5296	2.7407	0.36487	1.26554e+06	6786.5	1758.4	999.7	186.478
	163211	2317.1	698.4	339.3	70.4375	2.05836	0.485825		87189.3	1590	500.2	257.9	54.836	1.93951	0.515594		49401.7	3179.1	1420.9	58.8	15.5395	24.165	0.0413822	240185	2905.5	911.9	343.4	82.6657	2.6555	0.376576	146258	2542	719.7	298.4	57.5368	2.41186	0.414617	28713.3	1060.1	355.6	126.6	27.0855	2.80885	0.356018	316673	3196.7	1113.9	389.4	99.0624
	781262	9536.2	3102.3	414.9	81.9259	7.47722	0.133739		75144.3	2197.5	664.3	198	34.1954	3.35505	0.298058		16151.2	773.6	286.3	80	20.878	3.57875	0.279427	13581	860.2	220	93.1	15.7882	2.36305	0.423182	76143	1808.1	658.1	174.6	42.1122	3.76919	0.265309	400734	8673.4	1802.4	394.3	46.2027	4.57114	0.218764	229489	2853.5	914.4	361.2	80.4236
	72467.7	2035	497.8	206.8	35.6107	2.40716	0.415428		29073.3	915.3	317	121.2	31.7637	2.61551	0.382334		298996	7253.4	1408.9	434.8	41.2215	3.24034	0.30861	81425.4	1417.9	419.1	262.2	57.4268	1.5984	0.625626	14361.7	559.9	170	112.8	25.6505	1.50709	0.663529	9302.4	782.9	335.2	52	11.882	6.44615	0.155131	10934.8	899.4	385.8	73.2	12.1579
	314660	8349.6	1453.3	571.1	37.6857	2.54474	0.392968		13124.8	700.8	273.3	63.6	18.7283	4.29717	0.232711		108643	2698.7	758.4	225.1	40.2576	3.36917	0.296809	34310	1313.1	353.4	168.7	26.129	2.09484	0.477363	18214.5	848.5	362.2	69.9	21.4667	5.18169	0.192987	93161.1	3665.2	931.3	351.2	25.4177	2.65177	0.377107	27511.9	1049.2	412.7	93.9	26.2218
	36206	1058	381.5	129.9	34.2212	2.93687	0.340498		42537.7	1263.3	397.2	170.8	33.6719	2.32553	0.43001		17048.5	1057.4	392.5	76.4	16.123	5.13743	0.19465	89987.7	1834.6	500.2	277.4	49.0503	1.80317	0.554578	50770.5	1464.5	514.1	146.1	34.6675	3.51882	0.284186	41392	1638.5	409.8	200.8	25.2621	2.04084	0.489995	189531	3061	1023.7	287.1	61.9181
	30918.5	1014.8	240	182.1	30.4676	1.31796	0.75875		137047	3724.1	1551.6	135.3	36.8001	11.4678	0.0872003		15821.7	1074.8	527.7	46.8	14.7206	11.2756	0.0886868	23572.9	838.2	278.4	121	28.1232	2.30083	0.434626	13662.1	976.7	444.5	68.1	13.988	6.52717	0.153206	28018.8	2640.8	775.8	159.4	10.61	4.867	0.205465	264716	3327	954.1	390.9	79.566
	162825	3560	1190.6	181.2	45.7375	6.57064	0.152192		71083.7	1440.9	489.8	196.2	49.3328	2.49643	0.400572		72624.8	2799.5	1225.9	95.7	25.9421	12.8098	0.0780651	604780	4758.1	1432.4	549.1	127.105	2.60863	0.383343	22128.1	1055	434	72.9	20.9745	5.95336	0.167972	22675.6	1501.3	581.9	81.8	15.104	7.11369	0.140574	15877.5	1546.8	713	42.8	10.2647
	16359.1	586.6	209.8	103.7	27.888	2.02314	0.49428		456909	4783.3	1147.5	701.5	95.5217	1.63578	0.611329		26888.3	1038.1	449.7	84.1	25.9015	5.34721	0.187014	8749.9	462.6	151.3	78.4	18.9146	1.92985	0.518176	67540.2	2901.4	978.6	458.7	23.2785	2.13342	0.468731	19938.1	917.9	260.8	145.4	21.7214	1.79367	0.557515	169218	2812.3	781.5	345.6	60.1707
	27268.5	1595.9	352.9	124.5	17.0866	2.83454	0.352791		341427	3839.2	1192.4	396.6	88.9318	3.00656	0.332607		8952.6	442.2	167.6	70.4	20.2456	2.38068	0.420048	109830	1707.8	460.1	329.4	64.3105	1.39678	0.715931	182606	6277	1539.2	592.4	29.0913	2.59824	0.384875	138254	5358.4	977.2	760.6	25.8013	1.28478	0.778346	14807.8	584.3	178.6	113.5	25.3428
	31400.1	914.1	321.8	130.1	34.3508	2.47348	0.404288		13834.5	561.1	161.8	115.9	24.656	1.39603	0.716316		14052.5	885.1	267.4	123.2	15.8767	2.17045	0.460733	53918.6	1575.1	358.4	229.2	34.2319	1.5637	0.639509	11710.4	533.3	185.9	83.8	21.9584	2.21838	0.45078	44301.9	1060.5	362.9	166.1	41.7745	2.18483	0.457702	237939	4330	1011.3	463.7	54.9514
	17814	640.1	193.4	121.9	27.83	1.58655	0.6303		303700	3135.8	1084.1	382.1	96.8494	2.83722	0.352458		227304	3880.9	607.2	513.7	58.5698	1.18201	0.846014	863250	9478.5	1347.5	1197.4	91.0745	1.12535	0.888609	29347	1002.8	398.7	98.1	29.2651	4.06422	0.24605	30923.6	1285.5	413.8	112.9	24.0557	3.66519	0.272837	10240.3	486.7	167.9	84.2	21.0403
	10574.9	599.1	262.5	53.9	17.6513	4.87013	0.205333		326705	3690.4	1032.9	456.3	88.5284	2.26364	0.441766		23278.9	1023.4	376.7	117.9	22.7466	3.19508	0.312981	14331.3	774.4	223.2	125.7	18.5063	1.77566	0.563172	42537.7	2523.7	630.1	198.1	16.8553	3.18072	0.314395	69497	1518	433.8	228.6	45.7819	1.89764	0.526971	375818	3343.7	1029.2	554.1	112.396
	1.14204e+06	8974.8	3199.2	481.6	127.25	6.64286	0.150538		37042.4	916.3	236.8	220	40.4261	1.07636	0.929054		277435	6784.5	2190.3	318.9	40.8925	6.8683	0.145596	37807.9	1170.6	352.2	147.1	32.2979	2.39429	0.41766	14442.8	771.9	276.1	80.9	18.7107	3.41286	0.29301	33164.3	1902	560.5	255.9	17.4365	2.19031	0.456557	30107.4	1158	295.1	160.6	25.9995
	40743.1	1672	499.2	181.8	24.3679	2.74587	0.364183		355784	3170.5	1250.5	370.2	112.217	3.3779	0.296042		30472.4	852.6	327.5	125.3	35.7406	2.61373	0.382595	16303.3	639.5	189.3	113.6	25.4938	1.66637	0.600106	24718.6	1004	246.8	145.8	24.6201	1.69273	0.590762	25737.6	1326.7	450.7	153.9	19.3997	2.92853	0.341469	379716	3871.2	1027.4	523.8	98.0875
	9566	626.3	244.7	58.4	15.2738	4.19007	0.23866		95807.4	1921.5	679.4	203.1	49.8607	3.34515	0.29894		213058	3980.2	1064.4	323.3	53.5296	3.2923	0.303739	34629.4	1874.2	355.8	157	18.4769	2.26624	0.441259	67829.1	1750.9	523.9	187.8	38.7396	2.78967	0.358465	28241.9	1030.1	379.6	114.8	27.4167	3.30662	0.302424	67793.7	1660.5	519.7	222	40.8273
	724880	9416.9	2126.9	868.1	76.9765	2.45006	0.408153		344159	2973.9	865.4	516.1	115.727	1.67681	0.596372		138837	2809.1	884.5	221.2	49.4239	3.99864	0.250085	12840.9	524.4	198.9	85.1	24.4868	2.33725	0.427853	37742	1285.8	357.4	174	29.3529	2.05402	0.486849	746693	10083.6	2225.5	850.5	74.0503	2.6167	0.382161	32297.4	980.2	393.6	114.5	32.9498
	476720	6639.2	1912.2	363.4	71.8039	5.26197	0.190043		23187.6	764.3	271.5	117.8	30.3383	2.30475	0.433886		289714	3635.9	917.6	442.1	79.6814	2.07555	0.4818	197551	4691.6	834.4	397.6	42.1074	2.09859	0.47651	17611.2	851.9	227.7	121.9	20.6728	1.86792	0.535354	24814.9	778.6	296.1	117.1	31.8712	2.52861	0.395475	15309.7	741.6	201	114.1	20.6441
	181415	2429.9	800.6	296.2	74.6595	2.7029	0.369973		110970	1907	671.4	219.4	58.1909	3.06016	0.32678		110661	2894.6	1042.8	170.9	38.2301	6.10181	0.163886	15051.2	754.3	250.2	90.2	19.9539	2.77384	0.360512	7872.8	549.6	173.2	75.3	14.3246	2.30013	0.434758	11538.1	879.7	194.7	120.3	13.1159	1.61845	0.617874	100395	2936.9	574.8	413.5	34.1841
	1.34525e+06	11902.6	2487.4	1254.6	113.022	1.98262	0.504382		219624	2339.6	608.9	512.3	93.8722	1.18856	0.841353		22163.6	877.9	347.8	86.8	25.2462	4.00691	0.249569	417205	3734	1218.6	459.2	111.731	2.65375	0.376826	11573.5	635.2	263.3	61.2	18.2202	4.30229	0.232434	47744	2069.9	467.7	386.2	23.0658	1.21103	0.825743	32018.6	800	242.2	175.4	40.0232
	8592.7	616.8	242.8	48.7	13.9311	4.98563	0.200577		23304.2	815.6	302	110.7	28.5731	2.72809	0.366556		261791	6036.2	2062.3	237.5	43.3702	8.68337	0.115163	61238.9	1482.2	464.2	181.8	41.3162	2.55336	0.391642	29651.2	1268.7	467.9	101.6	23.3713	4.60531	0.21714	13672.3	886.7	380.4	50.8	15.4193	7.48819	0.133544	313570	3647.6	947.1	566.3	85.9662
	18468	982.4	323.3	90.5	18.7989	3.57238	0.279926		33889.2	1058.6	316	160.2	32.0132	1.97253	0.506962		458617	6334.3	2060.1	421.8	72.4022	4.88407	0.204747	23872	753.2	217.7	150.7	31.6941	1.44459	0.692237	25615.9	1028.8	310.7	128.5	24.8988	2.4179	0.413582	25681.8	1305	540.9	80.1	19.6795	6.75281	0.148087	121388	2461.8	843.2	254.1	49.3086
	69933	2695.1	746.6	204.1	25.9482	3.65801	0.273373		98524.6	1609.6	418.6	331.7	61.2106	1.26198	0.792403		845061	6867	2395.1	554.2	123.061	4.32173	0.231389	250207	3029.9	1079.7	322.1	82.5794	3.35206	0.298324	11122.4	707.5	250.8	71.2	15.7207	3.52247	0.283892	8937.4	654.8	262.7	73.7	13.6491	3.56445	0.280548	9424.1	497.1	198.5	63.2	18.9582
	1.34036e+06	17285.7	4476.6	812.6	77.5413	5.50898	0.181522		268848	3503.3	1020.6	380.6	76.7413	2.68156	0.372918		83493.7	2822.7	967.9	159.4	29.5794	6.07215	0.164686	339424	3409.5	803.4	571.3	99.5526	1.40627	0.711103	58947.5	1217.1	401.4	191.7	48.4327	2.0939	0.477578	55145.4	2993.9	1013.9	213.5	18.4193	4.74895	0.210573	30700.5	832.4	246.8	168.7	36.8819
	66485.7	1595.2	430.9	222.5	41.6786	1.93663	0.516361		329651	3807.5	913.2	550.4	86.5793	1.65916	0.602716		11071.7	873.9	264.9	107.7	12.6693	2.45961	0.406569	18944.5	701.6	223	116.9	27.0019	1.90761	0.524215	38031	1084.4	310.1	169.5	35.071	1.8295	0.546598	90433.8	2917.6	1201.5	271.3	30.996	4.42868	0.225801	10934.8	567.7	214.9	66.7	19.2616
	18300.7	1411.2	520.7	76.6	12.9682	6.79765	0.14711		504572	4002.8	1433	467.4	126.055	3.0659	0.326169		46877.1	3219.8	913	158.1	14.559	5.77483	0.173165	44661.8	1182	305.5	225.4	37.7849	1.35537	0.737807	32256.9	1237	515.1	85.7	26.0767	6.0105	0.166375	19963.5	1340.5	598.4	53.1	14.8926	11.2693	0.0887366	81182.1	1351.2	426.2	252.9	60.0815
	73517.1	3338.2	656.9	329.6	22.023	1.99302	0.501751		77121.4	2363.8	413.8	338.3	32.626	1.22317	0.817545		28718.4	1036.4	462.1	86.3	27.7098	5.35458	0.186756	16237.4	720.5	184.3	126.9	22.5363	1.45232	0.688551	72832.7	2729.7	709.2	279.9	26.6816	2.53376	0.39467	54420.5	1469.1	589	133.4	37.0434	4.41529	0.226486	1.08389e+06	5703.1	1546.3	961.1	190.052
	294712	3091.8	903.4	450.3	95.3206	2.00622	0.49845		28414.2	1110	304.1	186.8	25.5984	1.62794	0.614272		48068.5	1214.3	525.7	121.6	39.5854	4.32319	0.231311	35759.8	890.5	235.9	212.1	40.157	1.11221	0.89911	29093.5	1297.9	406.8	108.5	22.4158	3.74931	0.266716	50182.4	2327.4	826.1	186.3	21.5616	4.43425	0.225517	510544	9408.9	1555	677.6	54.2618
	19877.3	1191.1	262.1	134.5	16.6882	1.9487	0.513163		361102	3285.5	1040.7	456.7	109.908	2.27874	0.438839		124703	2591.8	923.3	332.7	48.1145	2.77517	0.360338	34056.5	969	366.3	144.8	35.146	2.5297	0.395304	47708.5	2666.7	775.7	397.9	17.8905	1.94948	0.512956	56722	2392.5	607.9	291.3	23.7083	2.08685	0.479191	14133.6	600.9	155	135	23.5207
	8040.1	612.1	222	61.6	13.1353	3.6039	0.277477		15122.1	749.5	226.9	111.1	20.1763	2.0423	0.489643		93318.3	2825.6	1161.4	116.9	33.026	9.93499	0.100654	41011.8	1440.8	439.5	181.3	28.4646	2.42416	0.412514	47008.9	1581.1	561.9	165	29.7318	3.40545	0.293647	51642.4	1485.5	588.6	116.9	34.7643	5.03507	0.198607	267727	3417.1	1186.7	322.9	78.3493
	273618	4193.8	1708.5	219.5	65.2435	7.7836	0.128475		840057	6749.8	1729.7	683.6	124.457	2.53028	0.395213		10676.2	842.5	397.6	39	12.672	10.1949	0.0980885	144829	2533.6	686.7	327.6	57.1633	2.09615	0.477064	8425.4	865.9	176.9	115	9.73022	1.53826	0.650085	13251.5	889.8	379.2	46.9	14.8927	8.08529	0.123681	15913	697.3	204.1	122.7	22.8209
	34857.5	969.6	372.5	123.4	35.9504	3.01864	0.331275		29093.5	1065.2	332.5	134	27.3127	2.48134	0.403008		105090	4164.7	932.8	304.6	25.2334	3.06238	0.326544	78921.1	3177.8	515.6	334.3	24.8351	1.54233	0.648371	16592.3	698.9	259.2	85.3	23.7406	3.03869	0.32909	62389.6	2341.1	791.8	219.2	26.6497	3.61223	0.276838	35699	942.9	275.2	178.7	37.8609
	8019.9	658.6	305.4	38.5	12.1772	7.93247	0.126064		31608	1062.1	254.1	191	29.7599	1.33037	0.751673		141159	4707.2	1021.5	240.9	29.9878	4.24035	0.23583	474444	4940.5	1297.9	496.3	96.0316	2.61515	0.382387	12739.5	1050.2	463.5	40.3	12.1305	11.5012	0.0869471	51759	2799.3	993.3	303.2	18.49	3.27606	0.305245	10427.8	542.5	202.4	69.3	19.2218
	324703	4155.6	1727.6	248.7	78.1362	6.94652	0.143957		49736.3	1514.9	415.4	178.6	32.8314	2.32587	0.429947		12415.1	909.2	421.8	57.2	13.655	7.37413	0.135609	260250	5255.9	1606.5	262	49.5158	6.13168	0.163087	58111	1459	468.3	169.7	39.8293	2.75958	0.362375	14508.7	1410.6	662	49.4	10.2855	13.4008	0.0746224	14660.8	872.3	210.1	116.9	16.8071
	86109.6	1894	414.7	310.9	45.4644	1.33387	0.749699		13601.3	987.5	275.2	108.6	13.7735	2.53407	0.394622		159774	4596.1	1053.6	320	34.7629	3.2925	0.303721	122549	2419.1	523.6	335.6	50.6588	1.56019	0.640947	30751.2	1160.5	503.9	82.6	26.4982	6.10048	0.163921	71752.9	2184.4	742.9	170.7	32.8479	4.35208	0.229775	8719.4	456.3	164.1	69.6	19.1089
	10093.3	1127.3	475.5	57.1	8.95352	8.3275	0.120084		30315.3	1082.6	316.8	171.5	28.0023	1.84723	0.541351		207969	4760.9	1430.2	367.3	43.6827	3.89382	0.256817	1.25956e+06	12274.1	3163.9	860.7	102.619	3.67596	0.272038	8278.4	676.2	242.5	60.1	12.2425	4.03494	0.247835	46877.1	2995.8	693.5	320.8	15.6476	2.16178	0.462581	10691.5	573.9	157.8	100.3	18.6296
	273517	4476.2	980.2	504.7	61.1047	1.94214	0.514895		291833	4113.3	1166.1	352.4	70.9485	3.30902	0.302204		117697	2600.1	1066.9	158.5	45.2665	6.73123	0.148561	215172	3308.3	673.1	424.4	65.0402	1.586	0.630516	40591	1760	420.4	207.4	23.0631	2.027	0.49334	26062	1304.9	301.9	156.1	19.9724	1.93402	0.517059	382930	4509	1000	550.3	84.9258
	497317	5843.6	1572.2	444.3	85.1046	3.5386	0.282598		172731	3506.2	1283.9	195.1	49.2645	6.58073	0.151959		134599	1939.5	640.6	274.4	69.3987	2.33455	0.428348	93911.4	2376.4	762.7	177.3	39.5183	4.30175	0.232464	28530.8	1022.6	408.1	96	27.9003	4.25104	0.235236	61411.2	1589	600.3	160.5	38.6477	3.74019	0.267366	139861	2251.6	590	339.8	62.1162
	134305	2623.3	889.4	206.5	51.1969	4.30702	0.232179		12901.7	575.3	176.9	100.1	22.426	1.76723	0.565856		344585	7017.9	2118.1	470.7	49.1009	4.49989	0.222227	405337	5391.7	1052.3	520.1	75.178	2.02326	0.494251	8957.7	806.6	339.7	38.5	11.1055	8.82338	0.113335	24764.2	1202.8	485.9	89.9	20.5888	5.40489	0.185017	11771.2	823.5	354.7	48.3	14.2941
	16972.5	607.5	159.3	144.3	27.9383	1.10395	0.905838		275367	7764.9	3091.1	440	35.4631	7.02523	0.142344		12354.2	943.4	189.2	159	13.0954	1.18994	0.840381	16156.3	940.1	186.2	139.7	17.1857	1.33286	0.750269	10037.5	571.3	161.4	89.2	17.5696	1.80942	0.552664	23937.9	2013.4	520.5	272.4	11.8893	1.91079	0.523343	18478.1	719.1	254.1	99.6	25.6961
	8242.9	724.4	361.3	31.8	11.3789	11.3616	0.0880155		38598.7	1026.9	292.6	187.4	37.5876	1.56137	0.640465		9003.3	819	386.1	34	10.993	11.3559	0.0880601	120019	2660.8	724.8	261	45.1064	2.77701	0.360099	38020.8	1632.9	509.3	174.6	23.2842	2.91695	0.342823	245650	8609	2555.8	1078.6	28.5341	2.36955	0.422021	586976	5768.9	1200.4	829	101.748
	22163.6	686.8	193.7	156.4	32.2708	1.23849	0.807434		33468.5	1329.9	386.3	171.1	25.1662	2.25774	0.44292		101597	1811.2	578.7	231.4	56.0936	2.50086	0.399862	274039	4699.7	1148.1	374.9	58.3099	3.06242	0.32654	20972.3	1368.8	457.3	134.4	15.3217	3.40253	0.293899	10585	585.9	164.7	95.5	18.0662	1.72461	0.579842	486068	3667.8	936.9	783	132.523
	486058	9256.5	1652.4	458.4	52.5099	3.60471	0.277415		30305.1	1055.8	439	92	28.7034	4.77174	0.209567		69608.5	1480.1	628.6	148.4	47.0296	4.23585	0.23608	69233.4	2573.8	436.7	248.7	26.8993	1.75593	0.569499	8795.5	502	184.5	65.8	17.5209	2.80395	0.35664	32773.9	2123.6	896.2	191.7	15.4332	4.67501	0.213903	102778	1580.2	597.6	226.7	65.0411
	320658	4854	1205.4	479.3	66.0605	2.51492	0.397627		236530	3742.3	1183.1	317.6	63.2045	3.72513	0.268447		13545.6	1055.3	490.1	50.5	12.8358	9.70495	0.10304	50025.3	1066.7	385.6	167.1	46.8973	2.3076	0.433351	54400.2	2946.7	1089.2	389.2	18.4614	2.79856	0.357326	90352.7	1847.4	457	296.6	48.908	1.5408	0.649015	34766.2	1274.3	466	122.7	27.2826
	8810.7	427.4	154.7	76	20.6146	2.03553	0.491273		357375	5380	1558.1	404.4	66.4267	3.85287	0.259547		344073	4294.8	1231.7	420.2	80.1139	2.93122	0.341155	30051.7	906.5	210	191.3	33.1514	1.09775	0.910952	42329.8	1062.8	380.4	148.2	39.8286	2.5668	0.38959	23861.9	1337	619.6	55.8	17.8473	11.1039	0.0900581	16744.4	801.1	340.8	68	20.9018
	384294	4742.2	1393.5	392.7	81.0371	3.54851	0.281808		12263	600.1	176.5	98.1	20.4349	1.79918	0.555807		18057.4	1028.6	379.5	76.5	17.5553	4.96078	0.201581	922933	6867	1779.1	712.6	134.401	2.49663	0.40054	24323.2	923.9	270.9	141	26.3267	1.92128	0.520487	14138.7	670.3	257.9	76.3	21.0931	3.38008	0.295851	46998.8	1322.4	319.9	209.3	35.5405
	8557.2	738	224.2	65.8	11.5951	3.40729	0.293488		8947.6	498.6	200	60.1	17.9454	3.32779	0.3005		14082.9	1125.7	441.5	51.9	12.5103	8.50674	0.117554	96410.7	1643.9	477.4	286	58.6475	1.66923	0.599078	58344.2	2875	966.6	455.8	20.2936	2.12067	0.47155	36155.3	2511	959.9	239.7	14.3988	4.00459	0.249714	192710	2257.5	788.8	322.5	85.3643
	27167.1	1146	403.2	98	23.706	4.11429	0.243056		9601.5	492.1	192.1	67.1	19.5113	2.86289	0.349297		507735	9396.4	1892.8	1199.5	54.0351	1.57799	0.633717	94180.1	2380.5	678.6	266.7	39.5632	2.54443	0.393015	10605.3	728.2	269.8	65.9	14.5637	4.09408	0.244255	39110.8	2201.3	557.8	165.2	17.7671	3.37651	0.296163	323055	2675.7	715.8	582.6	120.737
	26082.3	1151.6	242.4	173.4	22.6487	1.39792	0.715347		229144	6764.1	1262.5	596.2	33.8765	2.11758	0.472238		45817.6	1086.7	363.8	180.1	42.1621	2.01999	0.495052	638334	7582.2	1309.2	666.5	84.1885	1.96429	0.50909	18244.9	1245.3	485.8	77	14.651	6.30909	0.158501	60397.3	2751.3	715.4	233.7	21.9523	3.06119	0.32667	194002	2370.3	733.5	391.5	81.8472
	23187.6	2396.6	655	197.1	9.67521	3.32319	0.300916		30031.4	914.4	253.1	170.8	32.8427	1.48185	0.674832		155262	3952.4	1199.6	383	39.2829	3.13211	0.319273	15700.1	592.5	161.3	136.7	26.4981	1.17996	0.847489	115522	4049	1075.5	657.6	28.5311	1.63549	0.611437	17236.1	656.8	264.5	87.4	26.2425	3.02632	0.330435	31613	1250.3	355.1	218.3	25.2843
	14017	532.9	193.2	96.3	26.3032	2.00623	0.498447		662855	6200.7	1803.6	526.8	106.9	3.42369	0.292083		104461	1952.3	686.9	223.4	53.5066	3.07475	0.325229	39004.3	1394.1	305.3	185.8	27.9781	1.64316	0.608582	24257.3	1118.3	296	152.2	21.6912	1.94481	0.514189	10209.9	924.5	416.5	34	11.0437	12.25	0.0816327	111781	2071	780.4	205.5	53.9745
	963377	8937.6	2894	502.2	107.789	5.76264	0.173531		21317	805.9	300.9	95.4	26.4512	3.15409	0.317049		448316	9982.4	2179.8	787.4	44.9107	2.76835	0.361226	743555	7278.1	1853	933.4	102.163	1.98522	0.503724	109444	2997.4	1084.9	256.4	36.513	4.23128	0.236335	48616	2427.3	1163.3	67.7	20.0288	17.1832	0.0581965	57913.3	1693.1	349.1	276.1	34.2055
	252950	4685.6	1661.7	219.9	53.9845	7.55662	0.132334		7725.8	689.3	171	110.1	11.2082	1.55313	0.64386		8516.7	638.8	298.1	44	13.3323	6.775	0.147601	14275.6	682.4	187.3	114.5	20.9197	1.63581	0.611319	22736.5	735.5	277.9	108.1	30.913	2.57077	0.388989	14594.9	893.2	356.7	72	16.34	4.95417	0.20185	10240.3	774.2	351.1	43.7	13.2269
	15299.6	1017.7	436.6	47.9	15.0335	9.11482	0.109711		12116	514.4	202.9	82.8	23.5537	2.45048	0.408083		439303	3825.3	875.8	688.2	114.841	1.2726	0.785796	13074.1	558.2	185.6	101	23.4219	1.83762	0.544181								15578.4	1470.2	404.8	220	10.5961	1.84	0.543478	53026.4	1906.2	541.7	158.9	27.8179
	33524.2	1982.6	629.9	300.6	16.9092	2.09548	0.477219		106174	3715.9	1178.3	304.9	28.573	3.86455	0.258763		36500	1608.7	657.9	77.1	22.6891	8.53307	0.117191	546106	4946.8	1386.7	512.8	110.396	2.70417	0.369799					25.9953	3.393	0.359158	11340.3	837.4	392.8	56.9	13.5423	6.90334	0.144857	19284.2	659.8	223.4	113.9	29.2273
	1.44097e+06	17986.2	2694.9	1166.9	80.1155	2.30945	0.433003		51819.8	1910.2	386.7	243.3	27.1279	1.5894	0.62917		67190.4	1622.1	537.7	172.9	41.4219	3.10989	0.321555	243379	6491.3	1513.6	291.2	37.4931	5.1978	0.192389					12.3613	1.7696	0.144413	7852.6	728	336.8	31.8	10.7865	10.5912	0.0944181	125484	2150	618.6	352.9	58.3646
	128272	5270	1755.4	236.5	24.3401	7.42241	0.134727		22011.5	701.2	252.9	117.6	31.3912	2.15051	0.465006		14290.8	599.7	200.3	94.3	23.8299	2.12407	0.470794	9277.1	568.6	221.9	56	16.3157	3.9625	0.252366								149741	4474.2	826.2	469.4	33.4677	1.76012	0.568143	354435	5703.6	1209.2	571.9	62.1424
	9784	624.9	254.3	52.7	15.6569	4.82543	0.207236		24419.5	2772.9	1335.4	175.8	8.80648	7.59613	0.131646		115609	2595.6	676	274.3	44.5402	2.46445	0.405769	354192	3977.9	1230.7	400.6	89.0399	3.07214	0.325506								28039.1	1514.8	576.4	184.1	18.5101	3.13091	0.319396	32556	1291.2	519.8	120.1	25.2138
	27618.3	866.6	323	111.2	31.8697	2.90468	0.344272		114772	4082.5	1595.7	173.7	28.1132	9.18653	0.108855		81668.7	1932.2	664.3	200.6	42.2672	3.31157	0.301972	12374.5	604	173.9	101.5	20.4876	1.7133	0.583669								106570	2574	604.2	318.9	41.4024	1.89464	0.527805	265106	3625.2	863.2	562.2	73.1288
	12896.7	898.7	302.7	91.9	14.3504	3.2938	0.303601		77420.5	1301.1	378.3	269.9	59.5039	1.40163	0.713455		679534	11495.4	1641.5	716.7	59.1135	2.29036	0.436613	55784.1	1605.7	396.4	191.9	34.7413	2.06566	0.484107								212846	5390.5	957.3	643.4	39.4853	1.48788	0.672099	195381	5076.2	1164.7	408.6	38.4897
	32348.1	2415.8	541.7	192.5	13.3902	2.81403	0.355363		68239.8	1334.7	346.9	272.1	51.1274	1.2749	0.784376		115056	2219.5	784	195.9	51.8387	4.00204	0.249872	21935.5	1171.1	346	100.9	18.7307	3.42914	0.291618								108010	4131.6	1082.1	563.3	26.1423	1.921	0.520562	171641	3425.7	1466.9	275.7	50.104
	20257.5	790.3	303.2	91	25.6327	3.33187	0.300132		13505	549.4	220.9	80.1	24.5814	2.7578	0.362608		9510.3	809.1	150.1	106.3	11.7542	1.41204	0.708195	209525	5940	935.3	437.5	35.2736	2.13783	0.467764								20622.5	989.4	423.9	66.8	20.8434	6.34581	0.157584	18381.8	869.5	297.7	97.1	21.1407
	1.07965e+06	19958	3121.1	1132.8	54.0961	2.75521	0.362949		199964	2942.8	547.3	527.1	67.9503	1.03832	0.963092		10721.9	542.5	213.2	68.2	19.7639	3.1261	0.319887	503208	3764.3	1190.6	550.2	133.679	2.16394	0.46212								113287	2515.1	734.9	252.8	45.0427	2.90704	0.343992	43744.2	1001	364.1	163.2	43.7005
	170496	4467.5	1822.6	172.2	38.1635	10.5842	0.0944804		23425.9	911.3	279.2	123.7	25.706	2.25707	0.443052		466353	4359	1518.1	412	106.986	3.68471	0.271392	75686.8	1889.4	511.6	201.5	40.0586	2.53896	0.393862								33209.9	1469	621.7	118	22.6071	5.26864	0.189802	175367	2325.4	576.3	444.8	75.4138
	392902	6598.4	2101.8	341.8	59.5451	6.14921	0.162623		37914.4	1051.6	424.3	120.6	36.054	3.51824	0.284233		19451.5	889.6	329.3	80.5	21.8654	4.09068	0.244458	406042	4931.4	1296	504.7	82.3381	2.56786	0.389429								69091.4	2071.2	718	151.4	33.3581	4.7424	0.210864	15781.2	585.4	192.3	107.4	26.958
	83463.3	1554.4	515.5	214.7	53.6949	2.40102	0.416489		143922	2471.2	919.5	208.8	58.2395	4.40374	0.22708		388710	5681.1	850.8	815.2	68.4216	1.04367	0.958157	383721	3259.5	1176.5	423.8	117.724	2.77607	0.360221								32064.2	1203.1	382.2	148.5	26.6513	2.57374	0.38854	24835.2	1299.6	274.8	170	19.1099
	11573.5	708	228.2	111.7	16.3468	2.04297	0.489483		131288	3965.8	1712.5	115.2	33.1051	14.8655	0.0672701		8901.9	631.4	261.8	56.9	14.0987	4.60105	0.217341	61502.5	1432.8	364.5	232.1	42.9247	1.57044	0.636763								714883	10777.2	1826.1	1055.6	66.3329	1.72992	0.578063	9708	475.9	170.4	84.6	20.3992
	539951	10847.3	1636.8	997.1	49.7775	1.64156	0.609176		159429	4572.6	1188.7	731.3	34.8661	1.62546	0.61521		53137.9	1565	556.9	136	33.9539	4.09485	0.244209	454927	5061.4	1297.7	513.1	89.8816	2.52914	0.395392								11573.5	912.3	249.1	132.3	12.6861	1.88284	0.531112	54308.9	1292.2	344.9	238.1	42.0282
	275022	4370.3	1612.8	238.1	62.9298	6.77362	0.147631		103523	2346.2	556.5	270.4	44.1237	2.05806	0.485894		80720.7	2110.9	913.3	124.5	38.2399	7.33574	0.136319	15679.8	783	221.6	115.1	20.0253	1.92528	0.519404								11629.3	479.4	181.7	84.6	24.258	2.14775	0.465603	9753.6	498.6	173.2	74.2	19.562
	20576.9	1470	524.3	98.2	13.9979	5.3391	0.187297		43815.2	1631.8	344.3	289.6	26.8508	1.18888	0.841127		369350	10785	2704.9	860.3	34.2466	3.14414	0.318052	142801	2059.5	571.3	372.5	69.3378	1.53369	0.652022								7685.3	515.8	158.5	75.6	14.8998	2.09656	0.476972	88061.3	1420.5	422.7	271.9	61.9932
	15811.6	625.2	202.3	116.6	25.2905	1.73499	0.576372		76411.7	1723.8	583	184.5	44.3275	3.15989	0.316467		152605	2955.7	941.4	276.3	51.6309	3.40717	0.293499	75012.5	1330	418.5	248	56.4004	1.6875	0.592593								14934.6	1121.2	493	41.5	13.3202	11.8795	0.0841785	57715.6	1913.8	749.6	114.4	30.1576
	495690	6199.5	1653.3	521.9	79.9565	3.16785	0.315672		11183.2	585.7	157.1	111	19.0937	1.41532	0.706556		56397.6	1391	558.7	137.1	40.5446	4.07513	0.245391	389222	3206.2	1043.3	506.5	121.397	2.05982	0.485479								79134	4159.1	1146.1	464.4	19.0267	2.46792	0.4052	41310.9	1491.4	398.6	177.6	27.6994
	272853	3339	1051.9	344.1	81.7169	3.05696	0.327122		34152.8	1325.2	450.7	128.2	25.7718	3.5156	0.284446		48833.9	1971.7	432.7	266.1	24.7674	1.62608	0.614976	305008	3907.8	895.2	468.9	78.0511	1.90915	0.523794								48585.5	2191.7	606.6	221.5	22.168	2.7386	0.36515	32910.8	1067.3	255.2	200.3	30.8356
	16906.6	977.5	432	53.5	17.2958	8.07477	0.123843		16267.8	861.1	281.7	79.5	18.8919	3.5434	0.282215		13728.1	571.6	187.2	101.2	24.017	1.8498	0.540598	31826	991.2	235.2	194	32.1086	1.21237	0.82483								47809.9	1729.6	598	219.6	27.6422	2.72313	0.367224	300212	4316.4	796.3	544.5	69.5516
	33554.6	1118.6	301.3	162.2	29.997	1.85758	0.538334		77435.7	1947.1	470	266.3	39.7698	1.76493	0.566596		50983.4	1260.5	389.8	200.7	40.447	1.9422	0.514879	305262	3497.5	939.6	457	87.2799	2.05602	0.486377								36702.8	1925	664.9	267.8	19.0664	2.48282	0.402767	38441.6	1278.6	402.3	174	30.0654
	247176	5175.2	946.9	615	47.7616	1.53967	0.649488		19953.3	663.4	206.6	131.8	30.0773	1.56753	0.637948		44012.9	1872.9	846.3	76.6	23.4999	11.0483	0.0905116	623501	5825.6	1305.3	650.2	107.028	2.00754	0.498123								155586	4741.1	1146.3	278.3	32.8165	4.11894	0.242781	195954	2865.9	865.6	341.6	68.3744
	687178	7966.1	2442.1	394.9	86.2628	6.1841	0.161705		60199.6	2266.7	778.5	155.6	26.5583	5.00321	0.199872		301936	2796	921	427.8	107.989	2.15288	0.464495	440002	8234.6	1335.2	528.9	53.4334	2.52448	0.39612								90155	4856	1236.8	356.3	18.5657	3.47123	0.288082	315324	2706	734.5	582.8	116.528
	18564.3	1114.3	219.2	146	16.6601	1.50137	0.666058		147708	3695.4	1110.4	227.1	39.9709	4.88948	0.204521		81313.9	3560	1274.5	142.5	22.841	8.94386	0.111809	224434	2565.1	689.3	458.9	87.4954	1.50207	0.665748								15836.9	1057.8	286.1	141.3	14.9715	2.02477	0.493883	201886	2754.4	909.3	305.2	73.2956
	95853	1879.2	506.9	292.4	51.0073	1.73358	0.57684		173390	2914.1	683	462.3	59.5004	1.4774	0.676867		143582	3832.1	1847.9	201.4	37.4682	9.17527	0.108989	25159.6	827.7	282.7	127.9	30.397	2.21032	0.452423								42623.9	2025.5	467.3	262.8	21.0436	1.77816	0.56238	43201.8	964	305.6	195.1	44.8151
	323375	4526	1976.5	218.7	71.4482	9.03749	0.11065		169694	2580.3	592.2	410.1	65.7654	1.44404	0.692503		22924	763.9	234.6	132.8	30.0092	1.76657	0.56607	28799.5	1767.7	347.5	178.6	16.2921	1.94569	0.513957								12714.2	943.2	352.3	141.7	13.4799	2.48624	0.402214	45244.8	978.9	348	174	46.22
	224774	5362.9	1202	326.1	41.9128	3.68599	0.271298		11649.6	796.1	199.2	144.1	14.6333	1.38237	0.723394		51196.3	1536.3	551.3	174.3	33.3244	3.16294	0.316162	379387	3397.2	890.6	564.5	111.676	1.57768	0.633842								18574.4	888.1	361.4	78.4	20.9148	4.60969	0.216934	97896	2142	516.5	399.4	45.7031
	672776	5971.1	1846.8	488.7	112.672	3.77901	0.26462		316597	5000.3	924.7	595.9	63.3156	1.55177	0.644425		58268.2	1316.2	524.6	147.5	44.27	3.55661	0.281167	44611.1	1160.9	335.5	186.7	38.428	1.797	0.556483								174941	5618.3	1978.5	404.1	31.1378	4.89607	0.204246	124556	2892.1	909	342.7	43.0677
	14133.6	846	212.8	130.6	16.7064	1.6294	0.613722		12901.7	547.5	201.7	83.8	23.5647	2.40692	0.415469		9981.7	749.7	318.4	44.8	13.3143	7.10714	0.140704	312957	4444.5	695.7	647.4	70.4144	1.07461	0.930574								102469	2509.9	979.4	197	40.8258	4.97157	0.201144	11933.5	524.1	180.4	88.9	22.7695
	15771	727.5	298.3	73.5	21.6784	4.0585	0.246396		9723.2	622.6	177.1	94	15.6171	1.88404	0.530774		35181.9	2214.4	478.3	285.8	15.8878	1.67355	0.597533	29286.2	766.3	209.6	182.4	38.2177	1.14912	0.870229								35719.3	1418.9	499.8	105.6	25.1739	4.73295	0.211285	118980	2552.2	694.6	342.5	46.6185
	718634	9364.6	1614.9	721.2	76.7394	2.23918	0.446591		56767.6	2331.8	471.4	314.8	24.345	1.49746	0.667798		46922.8	4853.9	878.2	189.5	9.66703	4.6343	0.215782	28814.7	1062	256.9	159.7	27.1325	1.60864	0.621643								444053	5558.8	2120.1	290.7	79.8829	7.29309	0.137116	7781.6	481.8	157.4	84.6	16.1511
	14214.7	628.2	177.7	115.6	22.6277	1.5372	0.650535		12039.9	700.6	299.6	55.7	17.1851	5.37882	0.185915		268270	7947.4	1795.3	562.6	33.7557	3.19108	0.313374	14331.3	621.2	196	107.7	23.0703	1.81987	0.54949								116400	2342.9	652.2	247.3	49.6818	2.63728	0.379178	285714	7616.1	2602	319.4	37.5144
	529402	10524.8	1981.9	886.7	50.3004	2.23514	0.447399		28850.2	927	268	149.6	31.1221	1.79144	0.558209		61091.9	1298.7	389.2	220.1	47.0408	1.76829	0.565519	242791	4335.6	1095.9	362.7	55.9994	3.02151	0.330961								13723	767.7	297.9	94.8	17.8755	3.14241	0.318228	288507	4488.8	1798.6	255.7	64.2727
	241245	3182.9	961.3	351.4	75.794	2.73563	0.365547		47003.9	2393.8	962.5	82	19.6357	11.7378	0.0851948		68772.1	1802.1	673.1	145.3	38.1622	4.63248	0.215867	21428.5	1313.2	281.8	135.1	16.3178	2.08586	0.479418								81161.8	1931.2	612.4	210.2	42.0266	2.91342	0.34324	60392.3	1254.7	345.2	260.8	48.1329
	221849	3366.9	920.4	328.6	65.8912	2.80097	0.357019		83955	2390.9	1061.6	108.4	35.1144	9.79336	0.10211		11269.4	579.8	225.5	69.2	19.4367	3.25867	0.306874	419628	4611.5	1198.7	472.6	90.996	2.53639	0.39426								11239	809.7	351.7	60.6	13.8804	5.80363	0.172306	18270.3	693.4	166.5	154.1	26.3489
	9028.7	850.3	248.9	67.6	10.6183	3.68195	0.271595		25671.7	1623.4	592	112.9	15.8135	5.24358	0.190709		11882.8	1481.9	445.2	60.7	8.01862	7.33443	0.136343	442015	6304.7	1184.1	564.8	70.1088	2.09649	0.476987								11081.8	713.7	300.9	50.4	15.5273	5.97024	0.167498	76604.3	2063.6	547	235.8	37.1217
	7695.4	811.7	273.1	61.7	9.4806	4.42626	0.225925		60164.1	1369.3	562.4	141.2	43.9379	3.983	0.251067		19441.3	1078.5	444.7	98.8	18.0262	4.50101	0.222172	352083	3929.1	1001.3	466.9	89.609	2.14457	0.466294								35405	1715.1	771.6	129.9	20.6431	5.93995	0.168351	19882.4	1077.7	361.5	100.2	18.4489
	12800.3	1234.9	373.7	152.3	10.3655	2.45371	0.407546		165766	2573.5	599.6	452.1	64.4126	1.32626	0.754003		161502	3989	1337.6	219.9	40.4869	6.08276	0.164399	368001	3655.3	1296	402.4	100.676	3.22068	0.310494								37655.8	1893.4	809.5	189.1	19.8879	4.2808	0.233601	356848	7830.4	1647.9	645.2	45.5722
	16151.2	965.1	207	157.6	16.7353	1.31345	0.761353		31927.4	1477	481.1	132.4	21.6164	3.63369	0.275203		1.51963e+06	13165.5	3085.7	1177.9	115.425	2.61966	0.381729	254319	3565.7	847.8	416.3	71.3236	2.03651	0.491036								21555.3	2046.3	914.8	57	10.5338	16.0491	0.0623087	59104.6	1073.8	306.9	255.3	55.0425
	291898	6604.4	1625.8	277.3	44.1976	5.86296	0.170562		79509.1	2115.8	684.8	195.8	37.5787	3.49745	0.285923		23299.2	916.6	331.5	94.7	25.4192	3.50053	0.285671	34107.2	922.8	274.4	166.5	36.9606	1.64805	0.606778								17454.1	1391.1	352.3	139.7	12.547	2.52183	0.396537	12420.1	857	233.8	107.1	14.4925
	259201	6058.4	1236.2	487.8	42.7837	2.53424	0.394596		25332	673.8	191.8	171.5	37.5957	1.11837	0.894161		255652	3532.2	1393.7	247.9	72.3776	5.62203	0.177872	569309	5953	1535.3	509	95.6339	3.01631	0.331531								83073	2791.9	863.5	411.6	29.755	2.09791	0.476665	39120.9	975.1	252.5	216.9	40.1199
	38537.9	1111.5	334.5	161.6	34.672	2.06993	0.483109		44139.6	1314.6	383.1	160.3	33.5764	2.38989	0.418429		18265.2	801	351.5	70.3	22.803	5	0.2	56296.2	1787.7	390.7	234.6	31.4909	1.66539	0.600461								145219	3884.4	780.4	396.4	37.3853	1.96872	0.507945	208927	3901	726.4	482.3	53.5573
	405986	4184.8	1681.5	319.4	97.0145	5.26456	0.189949		13621.6	740.6	177.2	121.4	18.3927	1.45964	0.685102		14235	1149.3	523.6	62.5	12.3858	8.3776	0.119366	110529	1657.9	573.3	260.4	66.6681	2.20161	0.454212								148438	2347.5	938.9	226.1	63.2325	4.15259	0.240814	102332	1839.6	591.3	241.3	55.6272
	170901	2783.8	795.9	299.9	61.3913	2.65388	0.376806		207193	5601	1555.8	441.3	36.9922	3.52549	0.283648		29478.8	1201.2	421.3	136.2	24.5411	3.09325	0.323285	12415.1	571.5	171.7	102.6	21.7237	1.67349	0.597554								12197.1	565	210.6	78.3	21.5878	2.68966	0.371795	941730	9776.5	2068.7	991.3	96.3259
	253934	4748.6	832.6	652.1	53.4754	1.2768	0.783209		101506	1836.2	485.4	291.2	55.2802	1.6669	0.599918		12450.6	735.2	296.3	81.5	16.935	3.63558	0.275059	17910.3	871.1	194.7	137.2	20.5606	1.4191	0.704674								76198.8	2402.3	558.7	239.8	31.7191	2.32986	0.429211	11877.7	579.9	189.4	88.7	20.4823
	303969	2846.9	1065.7	377.3	106.772	2.82454	0.35404		27816	827.2	258.4	146.6	33.6267	1.76262	0.567337		259155	4241.6	1310	398.3	61.0984	3.28898	0.304046	148489	2764.6	778.7	255.8	53.7108	3.04418	0.328496								48509.5	2045.6	530.9	256.3	23.7141	2.0714	0.482765	9505.2	583.2	214.3	66.1	16.2984
	317246	4990.4	1417.9	357	63.5712	3.97171	0.251781		75124.1	3723.9	1425.6	150.2	20.1735	9.49134	0.105359		360985	4384	1461.7	326.9	82.3414	4.4714	0.223644	8466	601.3	164	102.5	14.0795	1.6	0.625								24526	1006.5	312.7	113.6	24.3676	2.75264	0.363287	74079.8	2410	613.3	191.3	30.7385
	278414	4368.7	1112	336.3	63.7292	3.30657	0.302428		41351.4	1303.8	566.3	108	31.7161	5.24352	0.190712		1.30764e+06	10883.8	2758.9	924.2	120.145	2.98518	0.334989	373076	4209.3	1144.2	440.2	88.6312	2.59927	0.384723								22128.1	1354.8	619.6	48.6	16.3331	12.749	0.0784377	387463	8838.7	1402.6	791.3	43.8371
	154197	2595.5	898.1	242.3	59.4094	3.70656	0.269792		147247	3433.9	721.3	354.3	42.8804	2.03585	0.491196		20460.3	647.1	195.6	138.2	31.6185	1.41534	0.706544	289840	3303.1	975	409.8	87.748	2.37921	0.420308								24155.9	1409.2	619.2	54.5	17.1416	11.3615	0.0880168	8298.7	451.4	157.9	79.1	18.3844
	38000.5	1509.1	490.4	119.2	25.1809	4.11409	0.243067		18569.4	683.8	194.1	128.7	27.1562	1.50816	0.66306		838597	6477.6	2178.8	515.1	129.461	4.22986	0.236415	178034	2502.5	534.6	461.7	71.1424	1.15789	0.863636								215852	6473.5	1287.3	643.4	33.3439	2.00078	0.499806	137919	2032.2	562	347.7	67.867
	73162.2	1629	421.4	244.8	44.9123	1.72141	0.580921		13687.5	667.1	203.4	96.4	20.5179	2.10996	0.473943		595751	7022.3	2667.8	333	84.837	8.01141	0.124822	238903	3048.3	639.4	568.3	78.3724	1.12511	0.888802								466216	9225.7	3578.4	359.2	50.5345	9.96214	0.10038	80061.7	2368.8	923.1	132	33.7984
	694919	5067.7	1755.5	526.8	137.127	3.33238	0.300085		165223	2500.6	640.1	384.2	66.0735	1.66606	0.600219		48676.8	1591	477	175.3	30.5951	2.72105	0.367505	119542	2027.5	673.7	247.6	58.9605	2.72092	0.367523								48103.9	1033.6	262.1	242.2	46.5402	1.08216	0.924075	254598	6161	1467.3	639.9	41.3241
	515973	8128.7	1904.9	967.4	63.4755	1.96909	0.507848		27562.6	816	247.1	148.2	33.7777	1.66734	0.599757		130280	2661.3	1045.2	170.8	48.9534	6.11944	0.163414	11664.8	506.5	184.5	86.3	23.0302	2.13789	0.467751								27684.2	1295.2	549.6	136.3	21.3745	4.03228	0.247999	11751	700.2	299.3	66.7	16.7823
	8004.7	637	266.8	43.8	12.5662	6.09132	0.164168		25038	939.6	388.1	91.2	26.6475	4.25548	0.234991		174105	3376.7	1441.1	187.1	51.5607	7.7023	0.129831	9135.1	522.6	171.4	76.3	17.4801	2.2464	0.445158								10311.2	787	297.4	88.5	13.1019	3.36045	0.297579	16318.5	636.5	192.9	117.2	25.6379
	74120.3	1317.9	441.8	227.6	56.2412	1.94112	0.515165		41310.9	1039.2	322.3	170.7	39.7526	1.88811	0.529631		357482	5703.2	1176.9	469.7	62.6809	2.50564	0.399099	9023.6	739.8	169.4	117.1	12.1974	1.44663	0.691263								33123.7	861.6	278.1	160.3	38.4444	1.73487	0.576411	46035.6	1269.4	412.2	154.3	36.2656
	141088	5130.5	1670.6	433.5	27.4998	3.85375	0.259488		96040.6	1494.1	395.4	316.5	64.2799	1.24929	0.800455		7979.3	554.9	187.9	61.2	14.3797	3.07026	0.325705	255226	4991.1	797.7	536.7	51.1363	1.48631	0.672809								30528.2	792.8	218.7	184.6	38.5068	1.18472	0.844079	20379.2	612.6	185.1	144.3	33.2667
	114265	2771.2	1147.7	143.3	41.2331	8.00907	0.124858		9018.5	656.5	256.5	54.6	13.7372	4.6978	0.212865		240134	3750.7	1126.1	346.3	64.0239	3.2518	0.307522	80943.8	1724	442.1	262.6	46.9512	1.68355	0.593983								13469.5	1268.8	572.2	42.9	10.6159	13.338	0.0749738	44403.2	2437.1	813.7	190.7	18.2197
	172123	3833	1202.1	213.4	44.9055	5.63308	0.177523		10711.7	539.8	181.7	83.9	19.8438	2.16567	0.46175		195711	3109.8	1177.2	237.2	62.9336	4.9629	0.201495	269268	3225.9	798	459.4	83.4708	1.73705	0.575689								7801.9	585.9	239.3	53.7	13.3161	4.45624	0.224405	13520.2	1200.9	482	137.5	11.2584
	24885.9	748.3	242.5	138.6	33.2566	1.74964	0.571546		338892	6283.1	1279.5	631.8	53.9371	2.02517	0.493787		69649.1	2147.7	707.9	288.5	32.4296	2.45373	0.407543															9343	680.7	301.8	48	13.7256	6.2875	0.159046	15355.3	925.9	362.4	59.8	16.5842
	18635.3	885.5	244.7	136.3	21.0449	1.7953	0.557009		22919	665.7	231.5	128.4	34.4284	1.80296	0.554644		43936.9	1185	368.9	160.3	37.0776	2.30131	0.434535					54.8154	2.10606	0.52421								18701.2	644.1	217	113.5	29.0346	1.91189	0.523041	13195.8	524.3	165.7	109.9	25.1684
	12379.6	689.4	272	62.1	17.9571	4.38003	0.228309		21575.5	1149.3	411.5	96.5	18.7727	4.26425	0.234508		36003.2	2013	982.6	85.2	17.8853	11.5329	0.0867087					32.7647	0.754554	0.157565								32272.1	1130.7	492.9	88.5	28.5417	5.56949	0.17955	250319	2686.4	677.7	521.7	93.1801
	512551	12176.9	2105.9	411.9	42.0921	5.11265	0.195593		34948.7	1112.2	281.5	166.2	31.423	1.69374	0.590409		39785	1881.9	532.9	137	21.1409	3.88978	0.257084															10159.2	841.8	353.1	51.2	12.0684	6.89648	0.145001	9505.2	716.3	228.8	70	13.2699
	10149	757.3	217.1	71.3	13.4016	3.04488	0.32842		53061.9	1274.7	333	216.7	41.627	1.53669	0.650751		63454.2	1626.3	553.3	164.2	39.0175	3.36967	0.296765															14214.7	1262.3	607.4	38	11.261	15.9842	0.0625617	18341.2	615.1	185.4	134.4	29.8182
	11659.7	607.2	222.1	75.2	19.2024	2.95346	0.338586		24226.9	807	308.1	102.9	30.0209	2.99417	0.333982		684344	13113.9	3710.1	739.9	52.1847	5.01433	0.199429															8613	459.3	193.8	60.6	18.7524	3.19802	0.312693	54719.6	1264.3	360.8	238.8	43.2806
	272766	4625.4	1437.7	298.2	58.9714	4.82126	0.207415		44124.4	1055.5	378.2	163.1	41.8043	2.31882	0.431253		873911	10658.7	1750.2	1345.8	81.9904	1.30049	0.768941															8354.4	577.6	250.2	56.2	14.464	4.45196	0.22462	169025	4687.2	1679.8	261.3	36.0611
	15862.3	723.2	282	75.2	21.9335	3.75	0.266667		60148.9	1408	449.4	183.1	42.7194	2.4544	0.407432		18675.8	904.3	373.6	80.3	20.6522	4.65255	0.214936															10007.1	1058	260	175	9.45851	1.48571	0.673077	59682.5	1187.8	322	260.3	50.2463
	44200.5	1862.4	835.4	75.6	23.7331	11.0503	0.0904956		18113.1	649.6	205.2	121.2	27.8835	1.69307	0.590643		76655	3156.7	1256.6	150.1	24.2833	8.37175	0.119449															24926.5	1074.6	496.4	76.6	23.1961	6.48042	0.154311	249249	5973.5	1711.9	611.3	41.7258
	83742.1	1619.8	575.2	193.1	51.699	2.97877	0.335709		57751.1	1187.5	382.4	211.5	48.6325	1.80804	0.553086		497576	5317.4	1656.1	427	93.575	3.87845	0.257835															45067.3	1786	794.6	85.6	25.2337	9.28271	0.107727	49356.1	1144.2	347.8	191.9	43.1359
	138376	2183.2	634.6	283.7	63.382	2.23687	0.447053		15051.2	543.9	163.2	128.6	27.6727	1.26905	0.78799		414265	4180.7	1486.4	384.3	99.0898	3.86781	0.258544															14838.3	921.8	387.2	73.1	16.0971	5.29685	0.188791	135805	2664.8	493.6	421.7	50.9627
	332378	5757.8	1380.9	381.5	57.7266	3.61966	0.276269		427658	7545.2	2918.5	540.5	56.6795	5.39963	0.185198		164524	2940.1	589.8	454.7	55.9585	1.29712	0.770939															93576.8	3700.6	1200	338.7	25.2869	3.54296	0.28225	113885	2116	476.3	355.1	53.8209
	86140	2906.5	826.6	201	29.637	4.11244	0.243165		413687	7086.7	1176.3	687.6	58.3751	1.71073	0.584545		437032	5321.3	1495.8	441.1	82.1287	3.39107	0.294892															125540	2444.8	746.7	257.6	51.3497	2.89868	0.344985	40656.9	850.7	237.4	219.9	47.7923
	85628	2667.9	1127.6	117.7	32.0957	9.58029	0.104381		362465	3590	1032.1	466.1	100.965	2.21433	0.451604		219208	2908	767.3	388.2	75.3809	1.97656	0.50593															34112.3	1281	317	179.7	26.6294	1.76405	0.566877	11309.9	587.4	236.8	71.2	19.2542
	10899.3	826.9	190.2	133.9	13.1809	1.42046	0.703996		115173	1584.4	465.3	328.5	72.6917	1.41644	0.705996		300304	4311.9	1138.1	411.1	69.6453	2.76843	0.361216															87894	4170	1069.5	673.6	21.0777	1.58774	0.629827	239972	4522.2	1288.1	310.5	53.0654
	122042	4042.9	1137.6	166.6	30.1867	6.82833	0.146449		62268	1758.9	351.3	277.8	35.4017	1.26458	0.790777		22858.1	1108.4	376.2	86.1	20.6226	4.36934	0.228868															76457.3	1867.3	613.4	241.7	40.9454	2.53786	0.394033	234041	2756.1	671.3	494.8	84.9175
	311913	4255.1	1660.6	290.9	73.3033	5.70849	0.175178		65988.9	1356.6	411.3	222.4	48.6429	1.84937	0.540725		97439.8	1711	565.1	228.3	56.949	2.47525	0.403999															46755.5	1361.1	539.9	134.8	34.3513	4.00519	0.249676	265390	2870.9	871.8	430.4	92.4415
	652468	17854.1	2017.2	1610.8	36.5444	1.2523	0.798533		9510.3	574.8	210.6	72.5	16.5454	2.90483	0.344255		20754.3	819	297.8	104.3	25.341	2.85523	0.350235															15984	1013	356.2	75.2	15.7789	4.7367	0.211117	71469	1555	611	151.7	45.9608
	9510.3	710.1	314.6	42.2	13.3929	7.45498	0.134139		116896	2347.3	438.9	412.5	49.8003	1.064	0.93985		255394	5095.7	1822.7	218	50.1194	8.36101	0.119603															8506.5	1051.6	528.5	39.1	8.0891	13.5166	0.073983	55961.6	1100.6	273.7	268.5	50.8464
	29747.5	992.7	347.3	119.2	29.9663	2.91359	0.343219		19380.5	782.5	294.7	93	24.7674	3.16882	0.315575		29189.9	1628.1	766.4	60.4	17.9288	12.6887	0.07881															39815.4	2082.4	745	139.2	19.12	5.35201	0.186846	329909	3824.4	935.7	556.9	86.2643
	35040	1725.2	375.3	292.5	20.3107	1.28308	0.779376		59454.4	1161.2	390.1	205.4	51.2008	1.89922	0.526532		7908.3	489	224.8	47	16.1724	4.78298	0.209075															15507.4	701.5	225.9	91.6	22.1061	2.46616	0.405489	82474.8	1842.3	446.6	279.8	44.7673
	10326.5	775.3	362.2	39	13.3194	9.28718	0.107675		63758.4	1446.4	525.6	175.3	44.0808	2.99829	0.333524		921848	7306.9	1859.1	719.6	126.161	2.58352	0.387069															52235.5	3121.2	914.7	526.3	16.7357	1.73798	0.57538	209023	4703.7	1651.7	371.8	44.4381
	13251.5	800.7	219.2	138.4	16.5499	1.58382	0.631387		281096	2853.6	878.1	440.9	98.5056	1.99161	0.502107		217271	4053	1386.9	224	53.6075	6.19152	0.161511															136180	3899.7	1431.8	191.1	34.9207	7.49241	0.133468	48712.3	1222.6	357.7	204.8	39.8432
	21104.1	1243	250	172.5	16.9784	1.44928	0.69		26827.5	1087.6	274.9	146.3	24.6667	1.87902	0.532194		724626	10992.9	2339.3	650.9	65.9176	3.59395	0.278246															107878	2760.2	1255.1	188.4	39.0833	6.66189	0.150108	69882.3	2931.3	1202.5	248.5	23.84
	20637.7	1186.4	415.1	70.4	17.3952	5.89631	0.169598		293409	3954	970.1	446.5	74.2057	2.17268	0.460262		372280	3541.8	987.9	512.7	105.11	1.92686	0.51898															121454	2914.4	752.2	263.8	41.6737	2.8514	0.350705	99812.3	2041.8	507.7	340.8	48.8845
	17697.4	1090.9	424.6	79.1	16.2228	5.36789	0.186293		31978	1050	379.6	114.6	30.4552	3.31239	0.301897		763362	13522.4	3028.4	577.7	56.4517	5.24217	0.190761															64300.8	2054.6	747.5	263.9	31.296	2.83251	0.353043	9206.1	464.5	171.8	71.2	19.8194
	142411	3120.7	1182.6	191.6	45.6342	6.17223	0.162016		273446	3558.6	893.9	513.9	76.8408	1.73944	0.574897		11456.9	540.2	209.4	74.3	21.2086	2.8183	0.354823															20977.4	689.5	260.8	104.3	30.4241	2.50048	0.399923	231998	5924.2	1297.9	497.6	39.1611
	532038	6607.3	2587.6	273.8	80.5228	9.45069	0.105812		26376.3	806.7	282.7	124	32.6965	2.27984	0.438628		24145.8	1462.3	533.4	79	16.5122	6.7519	0.148106															63621.5	2101.4	812.8	127	30.2758	6.4	0.15625	18184.1	1920.2	638.3	126.5	9.4699
	240469	6381.7	1155.7	452.7	37.681	2.5529	0.391711		15122.1	637.5	183.6	113	23.7209	1.62478	0.615468		215796	4038.4	1063.4	456.4	53.436	2.32997	0.429189															149138	3503.9	955.9	453.7	42.5634	2.1069	0.474631	12922	503.5	157.9	107.2	25.6643
	87853.4	2856.2	1200.1	98.8	30.7588	12.1468	0.0823265		12916.9	625.3	213.1	89.3	20.6571	2.38634	0.419052		645173	7254.9	2447.8	369.4	88.9292	6.62642	0.150911															15147.5	1129.2	510.1	92.7	13.4144	5.5027	0.181729	139602	3982	1039.1	291.4	35.0583
	101835	4992.2	1450.5	130.7	20.3988	11.0979	0.0901069		100527	3054.8	997.2	209.7	32.9079	4.75536	0.210289		15674.7	701.4	205.6	113	22.3477	1.81947	0.549611															45706.1	2053.3	780.6	306.4	22.2598	2.54765	0.392519	10569.8	498.4	179.9	81.6	21.2075
	40479.5	1978.7	949.8	63.5	20.4576	14.9575	0.0668562		21083.8	727.6	216.3	136.8	28.9772	1.58114	0.632455		213500	3716.9	768.8	404.8	57.4402	1.89921	0.526535															324987	6228.9	1507.3	1050.1	52.174	1.43539	0.696676	15923.1	576.9	218.4	95.4	27.6011
	60382.1	3583.8	1589.3	62.8	16.8486	25.3073	0.0395143		32510.3	850.8	270.9	156.5	38.2114	1.73099	0.577704		15558.1	809.1	345.2	64.2	19.2289	5.37695	0.185979															21459	1125	459.9	67.2	19.0747	6.84375	0.146119	54070.7	1143.7	422	168.7	47.277
	52945.3	1467.4	558	127.4	36.081	4.37991	0.228315		24019	691.8	198.9	159.9	34.7196	1.2439	0.803922		243769	3638.5	1376	262.1	66.9972	5.2499	0.19048															22452.6	699.3	220.6	135.4	32.1073	1.62925	0.613781	10367	469.5	160	85.8	22.0809
	46826.4	1019.1	292.6	210.4	45.9488	1.39068	0.71907		93369	2145.6	609.9	296.6	43.5165	2.0563	0.486309		9256.8	471.4	165.3	77	19.6368	2.14675	0.46582															51784.4	2075.9	754.9	305.4	24.9455	2.47184	0.404557	194286	2029.5	563.3	467.5	95.7312
	55581.4	2801	1147.3	146.5	19.8434	7.8314	0.127691		33270.8	1178.2	382.1	117.1	28.2387	3.26302	0.306464		12790.2	615.2	238.5	78.4	20.7903	3.04209	0.328721															18037.1	1215.2	603.8	41.2	14.8429	14.6553	0.0682345	12410	606.2	230.3	76.7	20.4718
	202007	4866.7	1437.4	250.4	41.508	5.74042	0.174203		225210	2686.7	684.6	468.2	83.824	1.4622	0.683903		129443	2204.3	664.6	269.2	58.723	2.4688	0.405056															29068.2	1142.4	410.2	114.5	25.4449	3.58253	0.279132	9728.3	541.1	220.3	58.9	17.9787
	15968.7	1061.9	306.4	81.3	15.0379	3.76876	0.265339		68873.4	2090.7	695.7	171.8	32.9427	4.04948	0.246946		236576	5615.9	1383.6	602.5	42.1261	2.29643	0.435458															78429.3	3120.7	611.9	323.2	25.132	1.89325	0.528191	17565.6	771.2	249.2	114.8	22.777
	12977.8	752.9	314.9	58.8	17.2371	5.35544	0.186726		64250.1	1294.5	377.8	235.1	49.6331	1.60698	0.622287		108278	5596.1	1736.5	148.6	19.3489	11.6857	0.0855744															116252	2411.1	807.4	220.8	48.2155	3.6567	0.27347	142061	2703.1	1004.7	253.4	52.5548
	53720.9	2023.3	588	135	26.5511	4.35556	0.229592		12805.4	685.2	220.8	87.2	18.6886	2.53211	0.394928		641041	14885.8	3106.7	607.5	43.0639	5.11391	0.195545															232515	6690.4	2854.2	462.6	34.7535	6.16991	0.162077	113642	2690.3	609.3	307.7	42.2413
									381623	6207.1	1441.3	683.4	61.4816	2.10901	0.474155		11122.4	510.4	182.1	79.1	21.7915	2.30215	0.434377															16987.7	725.7	294.4	77.3	23.4087	3.80854	0.262568	128074	1612.8	482.8	347.7	79.4112
					42.088	4.17178	0.352869		22599.6	792.6	294.8	105.2	28.5132	2.80228	0.356852		443353	5237.4	1407.8	433.7	84.6514	3.24602	0.308069															86302.2	1631.5	598.7	222.9	52.8975	2.68596	0.372307	9429.2	488.1	169.2	82.7	19.3182
					28.0454	3.11131	0.20128		380036	5514.5	1463.2	402.6	68.9157	3.63438	0.27515		79118.8	2145.9	927.2	117.1	36.8698	7.91802	0.126294															8866.5	567.2	200	68.3	15.6321	2.92826	0.3415	18123.3	848.6	280.4	105.7	21.3567
									50993.5	1343.5	321.6	212.9	37.9557	1.51057	0.662002		127268	2053.7	812.8	208.3	61.9703	3.90206	0.256275															10585	639.1	172	93.1	16.5624	1.84748	0.541279	17023.2	884.5	305.9	112.9	19.2461
									20526.2	619.1	186.9	145.7	33.1549	1.28277	0.779561		37595	1234	523.1	100.6	30.466	5.1998	0.192315															52930.1	1768.1	621.7	133.5	29.9361	4.65693	0.214734	30142.9	778.4	269.3	146.9	38.7242
									18569.4	735.8	210.2	132.8	25.237	1.58283	0.631779		261462	3943.8	1413.2	271.8	66.2969	5.19941	0.192329															27177.3	1314.7	330.2	192.9	20.6719	1.71177	0.584191	18174	701.4	270.8	87.4	25.911
									12851	570.6	203.4	85.7	22.5219	2.3734	0.421337		62932.1	2978.8	909.7	148	21.1267	6.14662	0.162691															490144	5272.9	1718.5	462.6	92.9553	3.71487	0.269188	435060	5750.8	939.5	714.2	75.652
									66161.3	1922.1	323.8	299	34.4214	1.08294	0.92341		206778	4492.4	1316.8	272.4	46.0283	4.83407	0.206865															23679.4	1147.2	480.4	65.7	20.641	7.31202	0.136761	12729.4	824.5	211.6	129.1	15.4389
									73998.7	1913.4	511.7	286.5	38.6739	1.78604	0.559898		19127	918.5	408.4	62.8	20.8242	6.50318	0.153771															8085.8	552.4	178.5	83.4	14.6376	2.14029	0.467227	170105	4692.4	855.7	520.7	36.2512
									42831.7	1059	333.7	169.8	40.4454	1.96525	0.50884		105794	2941.8	953.3	231.1	35.9624	4.12505	0.242421															162866	4308.4	1628.6	343.3	37.802	4.74396	0.210795	315740	6056.5	1874.2	282.3	52.1324
									53092.3	1370.2	411.4	183.3	38.7478	2.24441	0.445552		57852.5	3067	1353.3	133.9	18.8629	10.1068	0.0989433															27446	1858.2	798.3	221.9	14.7702	3.59757	0.277966	28946.5	1157.8	377.2	122	25.0013
									12967.6	980	257.9	113.7	13.2322	2.26825	0.440869		82626.8	3343.6	1282.9	107.6	24.7119	11.9229	0.0838725															13028.5	712.2	230.2	81.7	18.2933	2.81763	0.354909	101313	1674.4	557.8	251.1	60.5069
									358790	3697	967.4	504.9	97.0489	1.91602	0.521914		111315	3300.7	1145.7	166.5	33.7246	6.88108	0.145326															36636.9	1655.2	388.4	243.9	22.1344	1.59246	0.627961	74419.4	1613	580.8	167.1	46.1373
									15735.6	551.9	174.4	122.1	28.5117	1.42834	0.700115		19740.4	1076.9	441.3	75	18.3308	5.884	0.169952															420059	4595.3	1852.8	299	91.4106	6.19666	0.161377	9373.4	467.2	157.9	80.8	20.0629
									910528	7096.4	1615.5	751.8	128.308	2.14884	0.465367		111026	2836.3	971.1	197.5	39.1446	4.91696	0.203378
									37970.1	1134.2	433.1	126	33.4774	3.4373	0.290926		38522.7	2201.4	672	111.4	17.4992	6.03232	0.165774																			26.6803	4.35146	0.333432					45.9297
									358896	3533.8	945.6	507.4	101.561	1.86362	0.536591		7629.5	786	372.5	33.1	9.70674	11.2538	0.0888591																			14.8785	3.1944	0.181304					31.3233
									306073	9510.3	1381.1	810	32.1833	1.70506	0.586489		68011.6	1316.2	407.8	225.2	51.6727	1.81083	0.552231
									286860	3126.4	921.3	426.8	91.7539	2.15862	0.463258		49594.4	1720.4	755.5	106.8	28.8272	7.07397	0.141363
									51226.7	1294.5	431.7	157.2	39.5726	2.74618	0.364142		155064	5159	1518	270.9	30.057	5.60354	0.178458
									322787	3191.6	1023.3	432.9	101.136	2.36383	0.423043		89293.2	2097.7	572	251.6	42.5672	2.27345	0.43986
									750774	6020.2	2098.8	491	124.709	4.27454	0.233943		113312	1998.7	824.8	180.4	56.693	4.57206	0.21872
									11502.6	499.8	181.8	87.3	23.0144	2.08247	0.480198		10448.1	602.6	188.9	91.8	17.3384	2.05773	0.485971
									28951.6	737.7	229.5	166	39.2458	1.38253	0.723312		13915.6	709.2	284.3	72.7	19.6215	3.91059	0.255716
									40144.9	1406	611.9	105.7	28.5526	5.78903	0.172741		261188	6025.8	1375.8	397	43.3449	3.46549	0.288559
									293272	2732.3	772	500.4	107.335	1.54277	0.648187		9439.3	616.8	245.2	67.2	15.3037	3.64881	0.274062
									14402.3	548.4	172.9	113.2	26.2624	1.52739	0.654714		9606.6	652.6	278.6	46.7	14.7205	5.96574	0.167624
									25565.2	839	309.3	109.7	30.471	2.81951	0.354672		26776.8	1399.4	555.1	71.1	19.1345	7.80731	0.128085
									22310.6	938.6	281.2	127.2	23.7701	2.21069	0.452347		11862.5	693.5	247.5	63.7	17.1053	3.8854	0.257374
									138203	2654.7	676.5	391.8	52.0598	1.72665	0.579157		9505.2	613.1	252.5	56.8	15.5035	4.44542	0.22495
									21114.2	860	223.6	167.1	24.5514	1.33812	0.747317		53878	3129.3	970.4	234	17.2173	4.14701	0.241138
									157239	2583.6	476.6	461.8	60.8604	1.03205	0.968947		25043	1047	323.7	122.3	23.9188	2.64677	0.377819
									395538	4567.4	1254.8	460.5	86.6003	2.72486	0.366991		56782.8	1725.6	641.4	126.8	32.9061	5.05836	0.197693
									108876	3097.5	888.1	316.4	35.1498	2.80689	0.356266		119208	4206.5	1692.8	136.2	28.339	12.4288	0.0804584
									306326	3499	1138.9	387.5	87.5468	2.9391	0.340241		435531	6880	1564.9	730.6	63.3039	2.14194	0.466867
									9616.7	681.6	203.9	78.7	14.109	2.59085	0.385974		105860	3277.5	1013.9	164.2	32.299	6.17479	0.161949
									15183	637.3	243.3	81.6	23.8239	2.98162	0.335388		10858.7	753.6	326.7	53.4	14.4091	6.11798	0.163453
									53345.7	1894.4	669	167.9	28.1597	3.98451	0.250972		14873.7	666.6	209	102.9	22.3128	2.0311	0.492344
									9799.2	743.9	337.1	42.7	13.1727	7.89461	0.126669		178972	4486.4	1638.3	167.8	39.892	9.76341	0.102423
									629746	7322.1	1461.3	657.2	86.0063	2.22352	0.449737		119690	3141.8	1013.9	271.4	38.0958	3.73581	0.267679
									16810.3	541.9	152.1	144.5	31.021	1.0526	0.950033		36712.9	1021.8	302.5	174.8	35.9296	1.73055	0.577851
									36140.1	1003.4	376.1	128.9	36.0176	2.91777	0.342728		16612.6	778.4	340	64.1	21.342	5.30421	0.188529
									34766.2	1011.7	331.3	167	34.3641	1.98383	0.504075		127755	3414.7	1364.9	132.7	37.4132	10.2856	0.0972232
									30781.7	934.8	334.4	129.2	32.9286	2.58824	0.386364		38913	1751.1	526.8	132.8	22.222	3.96687	0.252088
									480117	5039.8	1337.1	522.5	95.2651	2.55904	0.390771		9763.7	577.1	260.4	52.7	16.9186	4.94118	0.202381
									8967.8	743.8	150.8	122.2	12.0567	1.23404	0.810345		10164.2	492.1	190.6	69.1	20.6547	2.75832	0.362539
									17976.2	781.3	238.3	112.2	23.0081	2.12389	0.470835		18701.2	956.3	366.8	88.1	19.5558	4.16345	0.240185
									13226.2	585.5	238	73.9	22.5896	3.22057	0.310504		62024.6	2174.3	536	215.4	28.5262	2.48839	0.401866
																	17986.4	1089.4	422.1	69.9	16.5104	6.03863	0.165601
													46.6531	2.7245	0.471488		13570.9	738.7	270.8	79.2	18.3713	3.41919	0.292467
													29.9583	1.87588	0.199228		57928.5	2227.5	976.4	137.3	26.0061	7.11143	0.140619
																	25595.6	1195.7	505.3	67	21.4064	7.54179	0.132594
																	52722.2	1754.1	686	137.1	30.0566	5.00365	0.199854
																	18244.9	866.5	319.4	81.8	21.0559	3.90465	0.256105
																	10666.1	852.9	385.4	37.5	12.5057	10.2773	0.0973015
																	118311	2673	721	294.6	44.2614	2.44739	0.408599
																	252580	4955.3	888.6	459.7	50.9717	1.933	0.517331
																	66232.3	2662.4	1238.1	94.2	24.8769	13.1433	0.0760843
																	12465.8	703.4	282	61.8	17.7222	4.56311	0.219149
																	56032.6	1108.1	279.4	267.8	50.5664	1.04332	0.958482
																	12562.1	544.5	186	92.9	23.0709	2.00215	0.499462
																	11882.8	674.7	282.6	63.2	17.612	4.47152	0.223638
																	17793.7	652.2	232.9	101.2	27.2826	2.30138	0.434521
																	42917.9	1281.2	294.9	279.1	33.4982	1.05661	0.946423
																	62288.2	2589.2	962.3	124.3	24.0569	7.74175	0.12917
																	477714	5691.8	2216.5	415.1	83.9302	5.33968	0.187277
																	272482	3692.7	1014.9	369.5	73.7895	2.74668	0.364075
																	10007.1	560.2	228.3	64.9	17.8634	3.51772	0.284275
																	15715.3	685.9	287.7	73.7	22.9119	3.90366	0.25617
																	10884.1	1141	496.5	57.7	9.53909	8.60485	0.116213
																	235440	3304.5	1051	333.3	71.2483	3.15332	0.317127
																					38.2227	4.66271	0.297275
																					24.8973	2.95251	0.173072
[truncated: 86 more columns]
